# Supplementary material
Source: PubMed Central journal article supplement (PMC3192229)
Supplement: NIHMS312734-supplement-1.pdf [file NIHMS312734-supplement-1.pdf]

# Supplementary Information

## A human memory T cell subset with stem cell-like properties

Luca Gattinoni<sup>1\*</sup>, Enrico Lugli<sup>2\*</sup>, Yun Ji<sup>1</sup>, Zoltan Pos<sup>3</sup>, Chrystal M. Paulos<sup>4</sup>, Máire F. Quigley<sup>5,6</sup>, Jorge R. Almeida<sup>6</sup>, Emma Gostick<sup>5</sup>, Zhiya Yu<sup>1</sup>, Carmine Carpenito<sup>4</sup>, Ena Wang<sup>3</sup>, Daniel C. Douek<sup>6</sup>, David A. Price<sup>5,6</sup>, Carl H. June<sup>4</sup>, Francesco M. Marincola<sup>3</sup>, Mario Roederer<sup>2\*</sup>, Nicholas P. Restifo<sup>1\*</sup>

<sup>1</sup>*Center for Cancer Research, National Cancer Institute, National Institutes of Health, Bethesda, Maryland, USA.*

<sup>2</sup>*ImmunoTechnology Section, Vaccine Research Center, National Institute of Allergy and Infectious Diseases, National Institutes of Health, Bethesda, Maryland, USA.*

<sup>3</sup>*Infectious Disease and Immunogenetics Section, Department of Transfusion Medicine, Clinical Center, and Center for Human Immunology, National Institutes of Health, Bethesda, Maryland, USA.*

<sup>4</sup>*Abramson Family Cancer Research Institute and Department of Pathology and Laboratory Medicine, University of Pennsylvania, Philadelphia, Pennsylvania, USA.*

<sup>5</sup>*Department of Infection, Immunity and Biochemistry, Cardiff University School of Medicine, Heath Park, Cardiff, UK.*

<sup>6</sup>*Human Immunology Section, Vaccine Research Center, National Institute of Allergy and Infectious Diseases, National Institutes of Health, Bethesda, Maryland, USA.*

\* L.G, E.L, N.P.R. and M.R. contributed equally to this study

Correspondence should be addressed to L.G. ([gattinol@mail.nih.gov](mailto:gattinol@mail.nih.gov)) or N.P.R. ([restifo@nih.gov](mailto:restifo@nih.gov)).

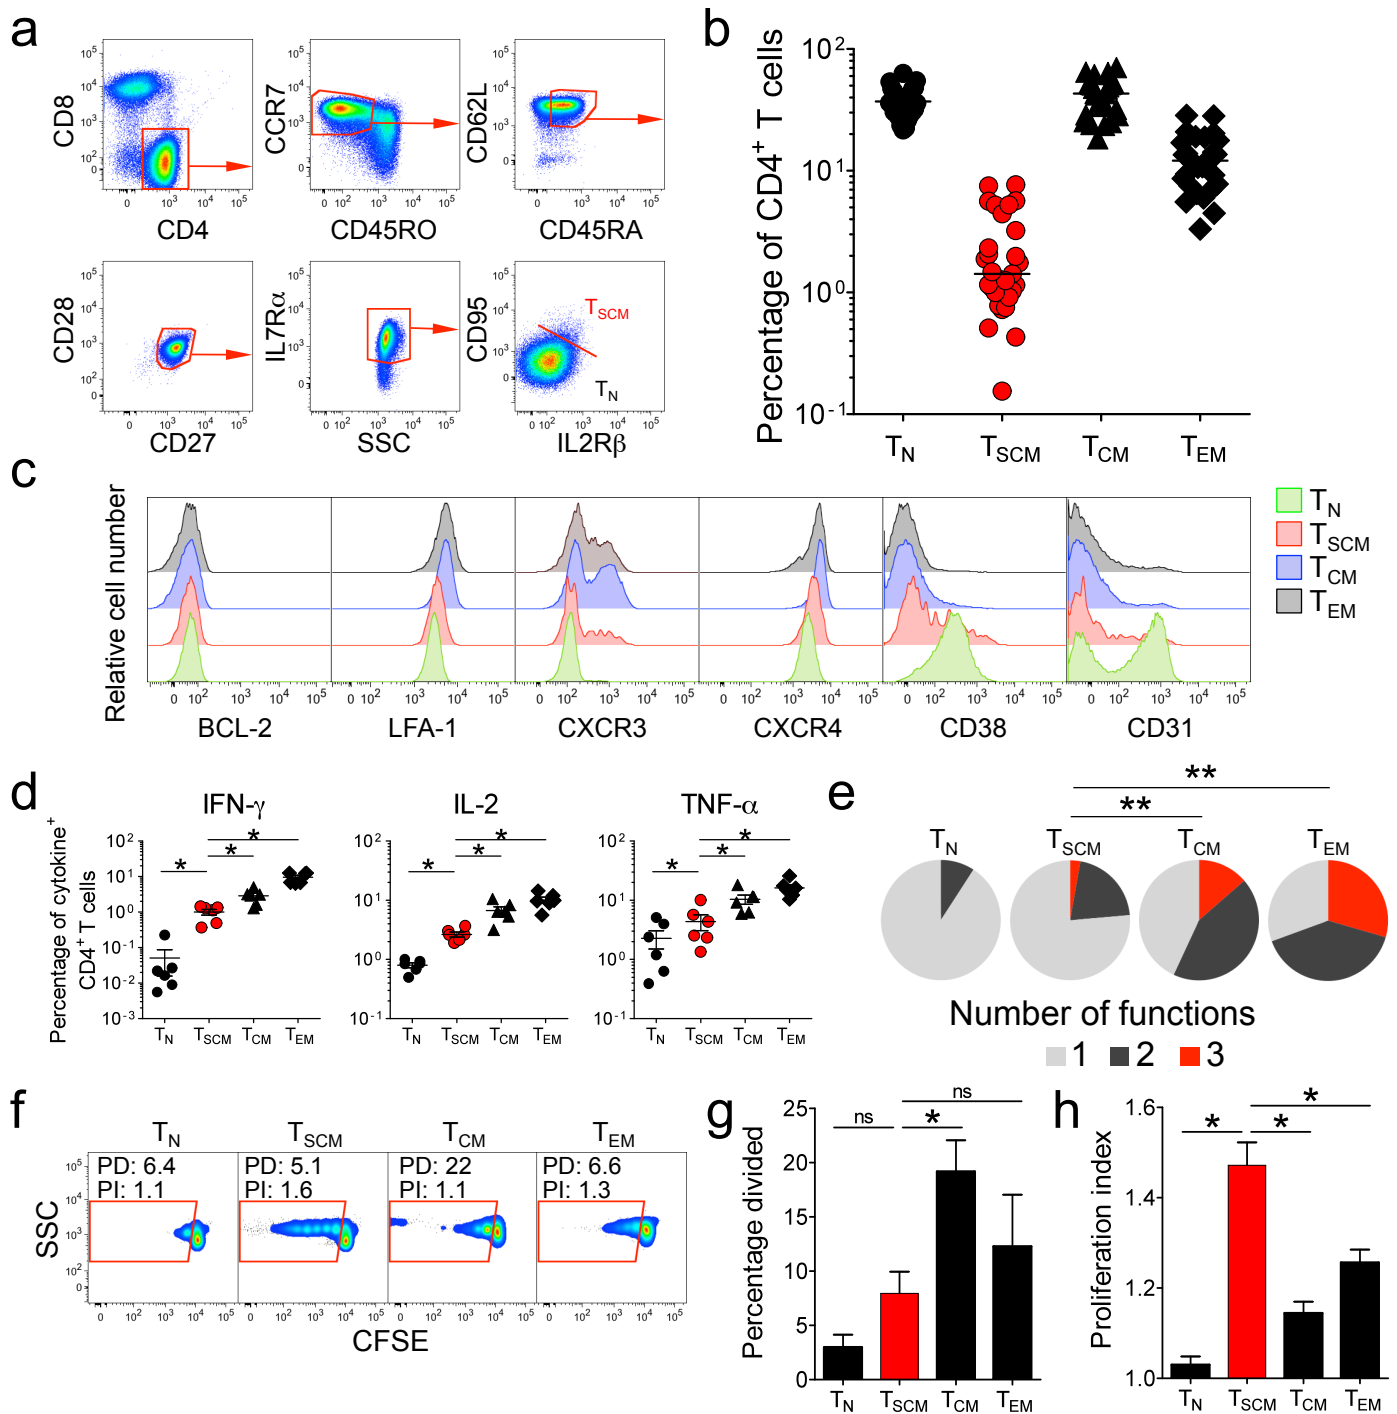

**Supplementary Fig. 1. T<sub>SCM</sub> cells are found within the CD4<sup>+</sup> T-cell compartment.** **a**, Flow cytometry analysis of PBMC of a healthy donor. Dot plots identify CD95<sup>+</sup>, IL2R $\beta$ <sup>+</sup> T<sub>SCM</sub> following depicted sequential gating. **b**, Percent of circulating CD4<sup>+</sup> T cell subsets in 29 healthy donors. **c**, Flow cytometry analysis of PBMC from a healthy donor. Overlaid histogram plots show expression levels of a given molecule in different CD4<sup>+</sup> T cell subsets. **d**, Percentage of CD4<sup>+</sup> T cell subsets, producing IFN- $\gamma$ , IL-2 and TNF- $\alpha$  after stimulation with SEB. Graph depicts the results from 6 healthy donors. **e**, Pie charts depicting the quality of the cytokine response in CD4<sup>+</sup> T cell subsets as determined by the Boolean combination of gates identifying IFN- $\gamma$ <sup>+</sup>, IL-2<sup>+</sup> and TNF- $\alpha$ <sup>+</sup> cells. **f**, CFSE dilution in sorted CD4<sup>+</sup> T cell subsets after stimulation with 25 ng ml<sup>-1</sup> of IL-7 for 14 days. Data are shown after gating on CD4<sup>+</sup> cells. PD: percent divided; PI: proliferation index. **g**, Percent divided cells and **h**, Proliferation index of different CD4<sup>+</sup> T cell subsets after stimulation as in **e**. Data are represented as means  $\pm$  s.e.m of 4 different donors. \*= $p < 0.05$ ; \*\*= $p < 0.01$ ; \*\*\*= $p < 0.001$ ; ns= not significant.

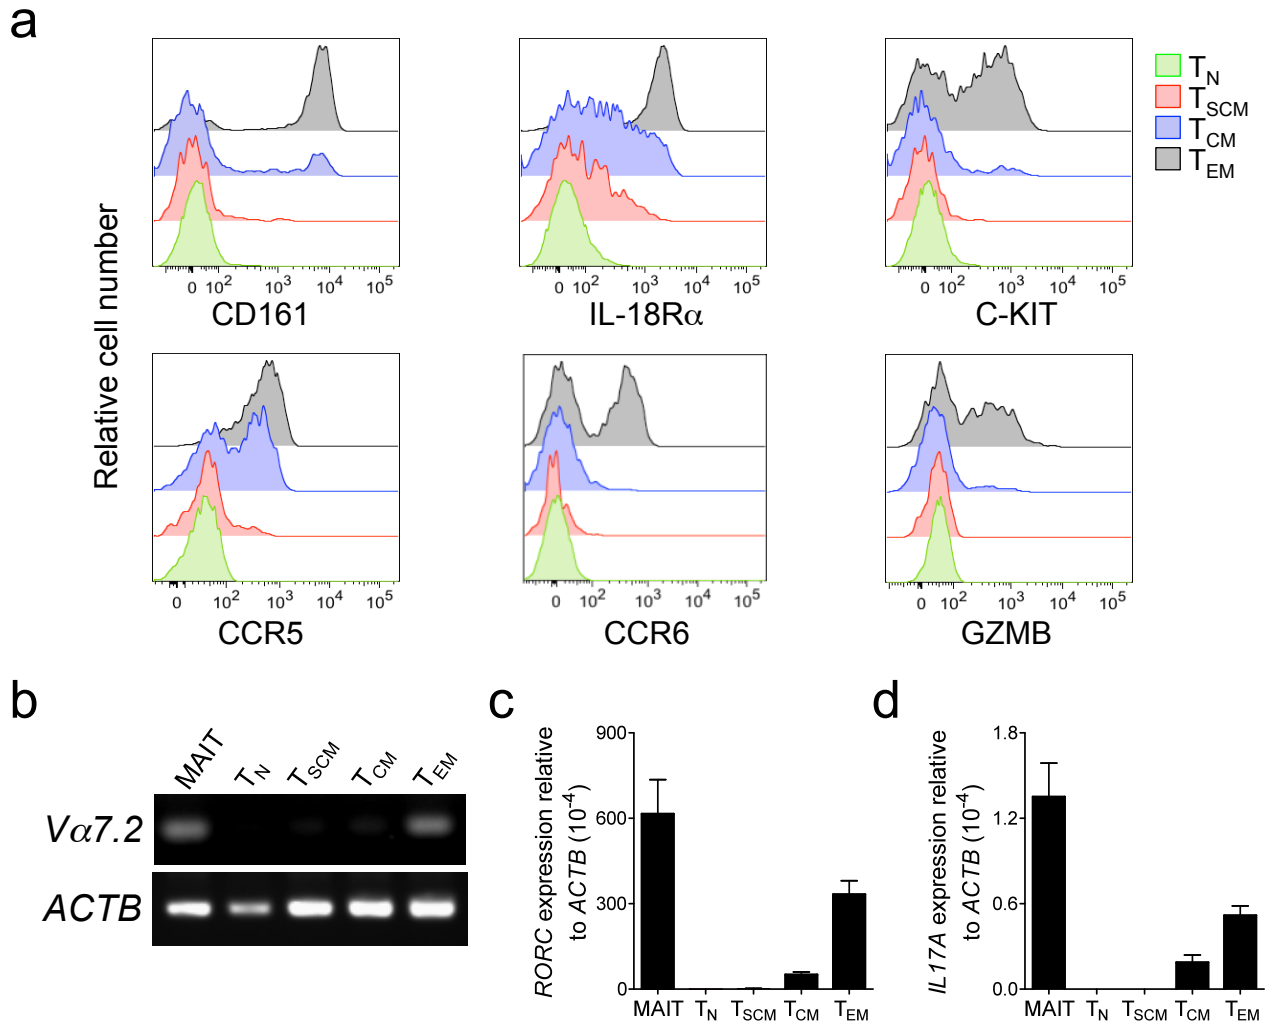

**Supplementary Fig. 2. T<sub>SCM</sub> cells do not comprise MAIT cells.** **a**, Flow cytometry analysis of PBMC from a healthy donor. Overlaid histogram plots show expression levels of CD161, IL-18R $\alpha$ , c-Kit, CCR5, CCR6 and GZMB in different CD8<sup>+</sup> T cell subsets. **b**, RT PCR products of V $\alpha$ 7.2 from sorted CD8<sup>+</sup> T cell subsets and MAIT. MAIT were sorted for CD3<sup>+</sup>, CD8<sup>+</sup>, CD45RO<sup>+</sup>, CD62L<sup>-</sup>, CD161<sup>+</sup>, IL18R $\alpha$ <sup>+</sup>. ACTB was used as control. **c,d** Quantitative RT-PCR analysis of the expression of RORC (**c**) and IL17A (**d**) in CD8<sup>+</sup> T cell subsets and MAIT obtained as in panel **b**. Data are represented as means  $\pm$  s.e.m.

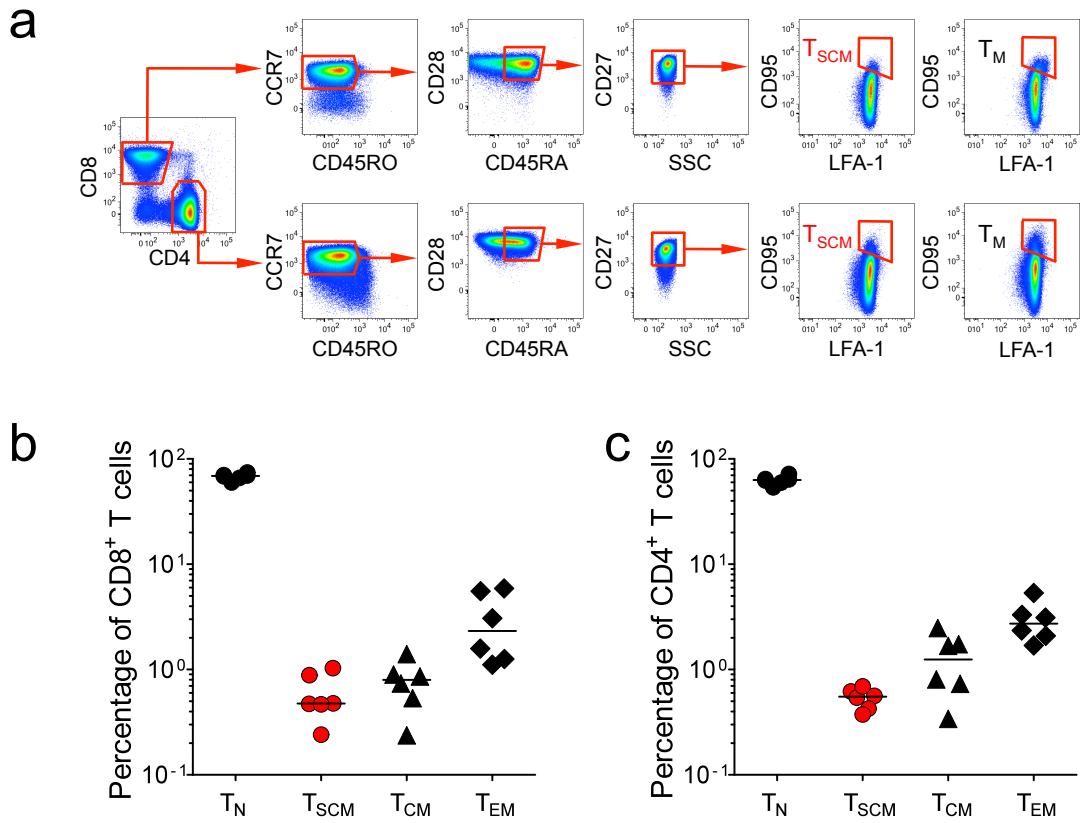

**Supplementary Fig. 3.  $T_{SCM}$  cells are found in cord blood.** **a**, Representative flow cytometry analysis of cord blood. Dot plots identify  $CD95^+$ ,  $LFA-1^+$   $T_{SCM}$  following depicted sequential gating.  $T_M$ , Total memory cells in  $CD8^+$  and  $CD4^+$  T cells from cord blood. **b**, Percent of  $CD8^+$  T cell subsets in the cord blood of 6 donors. **c**, Percent of  $CD4^+$  T cell subsets in the cord blood of 6 donors.

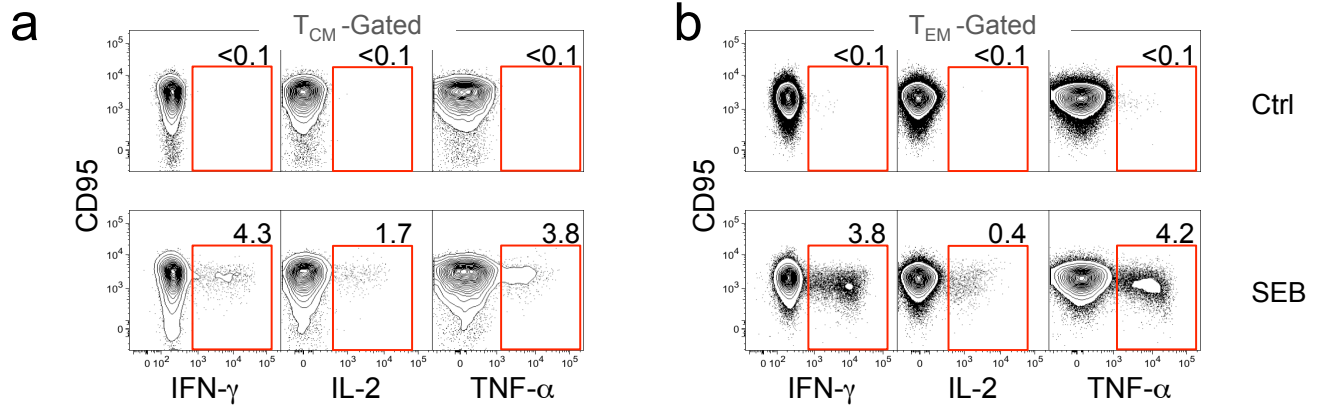

**Supplementary Fig. 4.  $T_{CM}$  and  $T_{EM}$  cells rapidly acquire effector functions.** Intracellular cytokine staining of PBMC from a healthy donor after a 4h stimulation with SEB. Dot plots show **a**,  $T_{CM}$  ( $CD45RO^+CCR7^+CD45RA^-$ ) gated  $CD8^+$  T cells, and **b**,  $T_{EM}$  ( $CD45RO^+CCR7^-CD45RA^-$ ) gated  $CD8^+$  T cells. Numbers represent the percentage of cells producing a single cytokine.

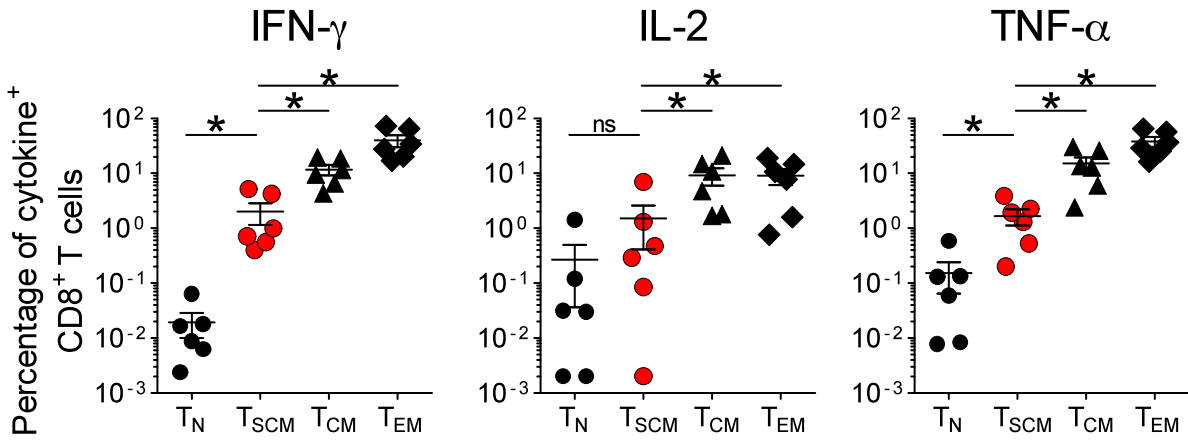

**Supplementary Fig. 5. T<sub>SCM</sub> cells rapidly acquire effector functions similar to conventional memory T cells.** Percentage of CD8<sup>+</sup> T cell subsets producing IFN- $\gamma$ , IL-2 and TNF- $\alpha$  after a 4h stimulation with  $\alpha$ -CD3/CD2/CD28 beads. Graphs depict the results from 6 healthy donors

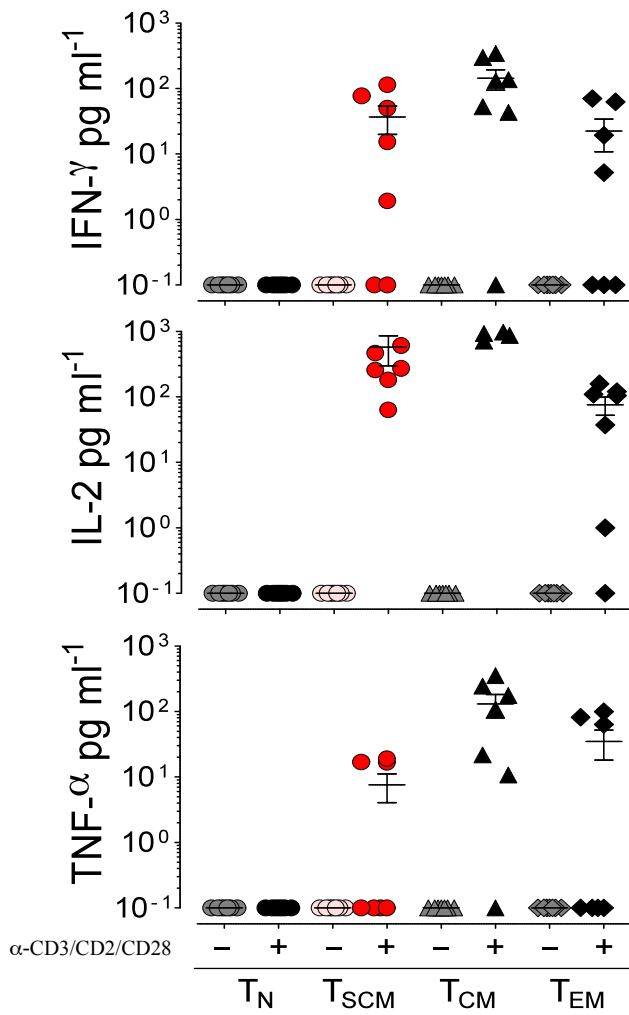

**Supplementary Fig. 6. T<sub>SCM</sub> cells rapidly release cytokines similar to conventional memory T cells.** IFN- $\gamma$ , IL-2 and TNF- $\alpha$  release by sorted CD8<sup>+</sup> T cell subsets after a 24h stimulation with  $\alpha$ -CD3/CD2/CD28 beads. Cytokine levels were determined using cytokine bead arrays. Graphs depict the results from 6 healthy donors.

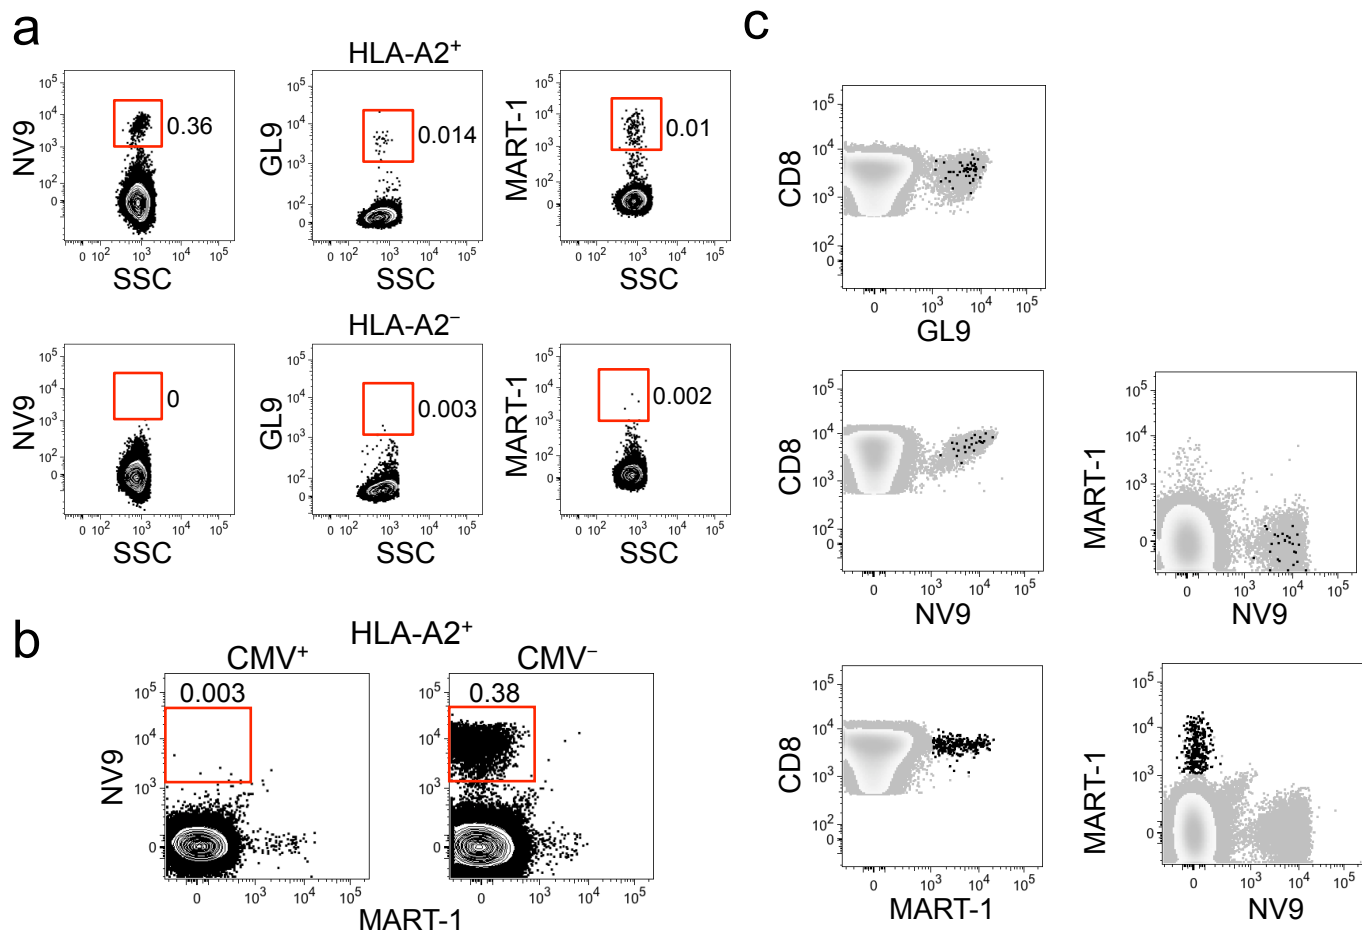

**Supplementary Fig. 7. Specificity of tetramer binding. a**, Representative flow cytometry of PBMC of HLA-A2<sup>+</sup> and HLA-A2<sup>-</sup> donors. Graphs are shown after gating on CD8<sup>+</sup> T cells. **b**, Representative flow cytometry of PBMC of CMV<sup>+</sup> and CMV<sup>-</sup> donors. Graphs are shown after gating on CD8<sup>+</sup> T cells. **c**, Representative flow cytometry of PBMC of healthy donors. Black dots show tetramer<sup>+</sup> NL-gated (CD45RO<sup>-</sup>CCR7<sup>+</sup>CD45RA<sup>+</sup>CD27<sup>+</sup>IL7R $\alpha$ <sup>+</sup>) CD8<sup>+</sup> T cells over bulk CD8<sup>+</sup> T cells (grey density plot).



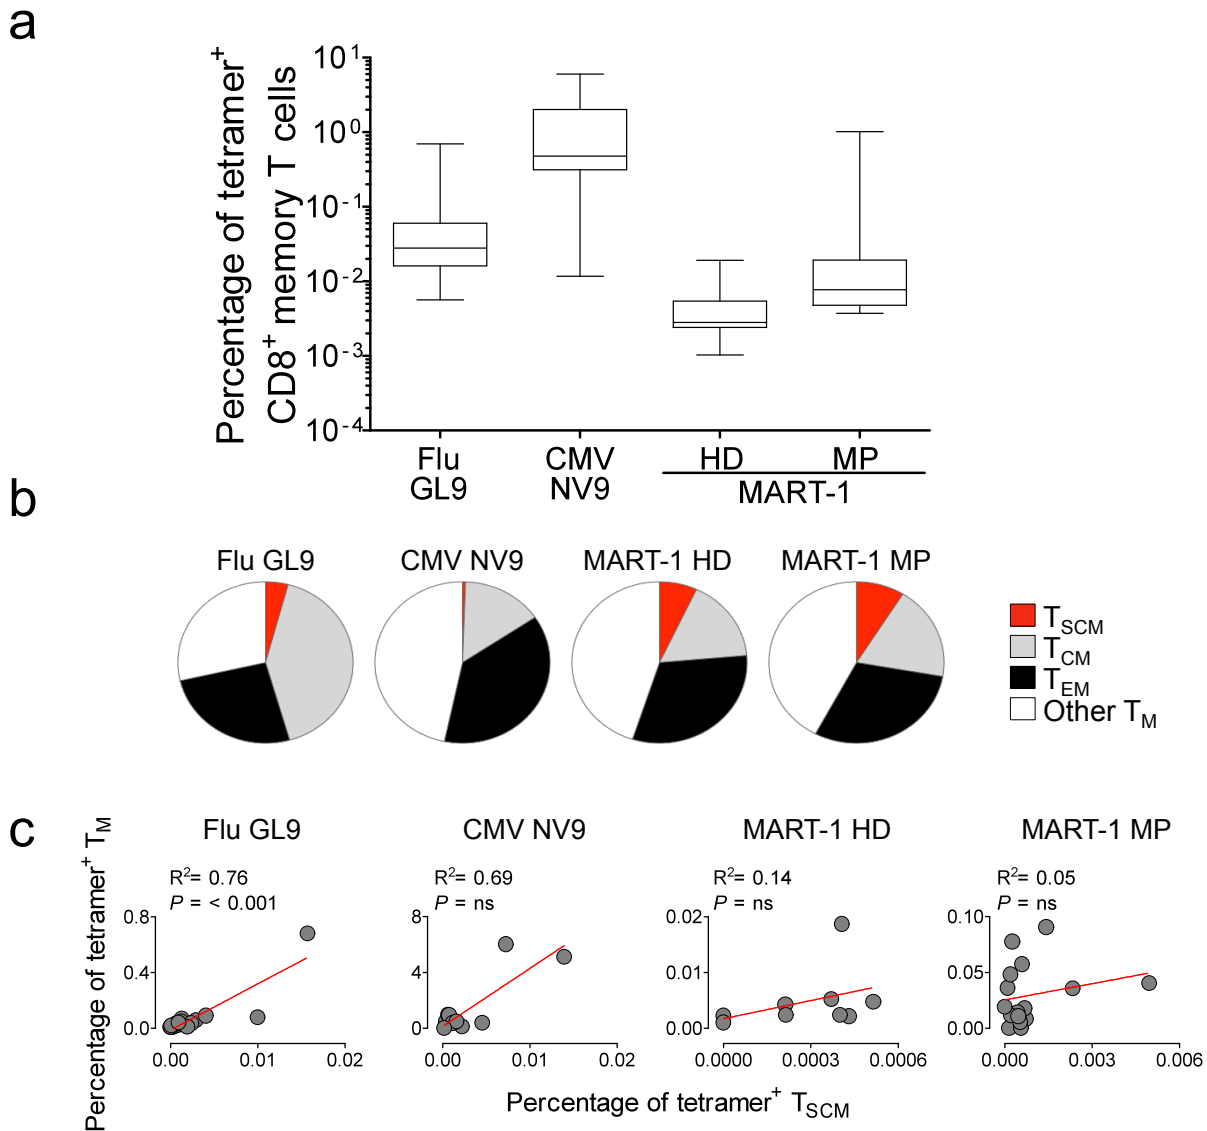

**Supplementary Fig. 8. T<sub>SCM</sub> cells bear viral and self/tumour specificities.** **a**, Percent of tetramer<sup>+</sup> CD8<sup>+</sup> memory T cells for Influenza matrix protein<sub>58-66</sub> (GL9), CMV pp65<sub>495-503</sub> (NV9), and MART-1<sub>26-35</sub> (27L). Data are represented as means  $\pm$  s.e.m of 19 donors (GL9), 10 donors (NV9), 9 donors (MART-1 HD) and 17 donors (MART-1 MP). **b**, Pie charts depicting the distribution of different memory CD8<sup>+</sup> T cell subsets among tetramer<sup>+</sup> memory T cells. Data are represented as means of 19 donors (GL9), 10 donors (NLV), 9 donors (MART-1 HD) and 17 donors (MART-1 MP). Memory subsets were defined as follows: T<sub>SCM</sub>: CD45RO<sup>-</sup>CCR7<sup>+</sup>CD45RA<sup>+</sup>CD27<sup>+</sup>IL7R $\alpha$ <sup>+</sup>CD95<sup>+</sup>; T<sub>CM</sub>: CD45RO<sup>+</sup>CD45RA<sup>-</sup>CCR7<sup>+</sup>; T<sub>EM</sub>: CD45RO<sup>+</sup>CD45RA<sup>-</sup>CCR7<sup>-</sup>; Other T<sub>M</sub>: cells that do not have a T<sub>SCM</sub>, T<sub>CM</sub>, or a T<sub>EM</sub> phenotype. **c**, Correlation between percent of tetramer<sup>+</sup> conventional memory T cells (T<sub>M</sub>) and tetramer<sup>+</sup> T<sub>SCM</sub>. Conventional memory were defined as CD8<sup>+</sup> T cells that were not CD45RA<sup>+</sup>CCR7<sup>+</sup>CD27<sup>+</sup>. HD: healthy donor; MP: melanoma patient.

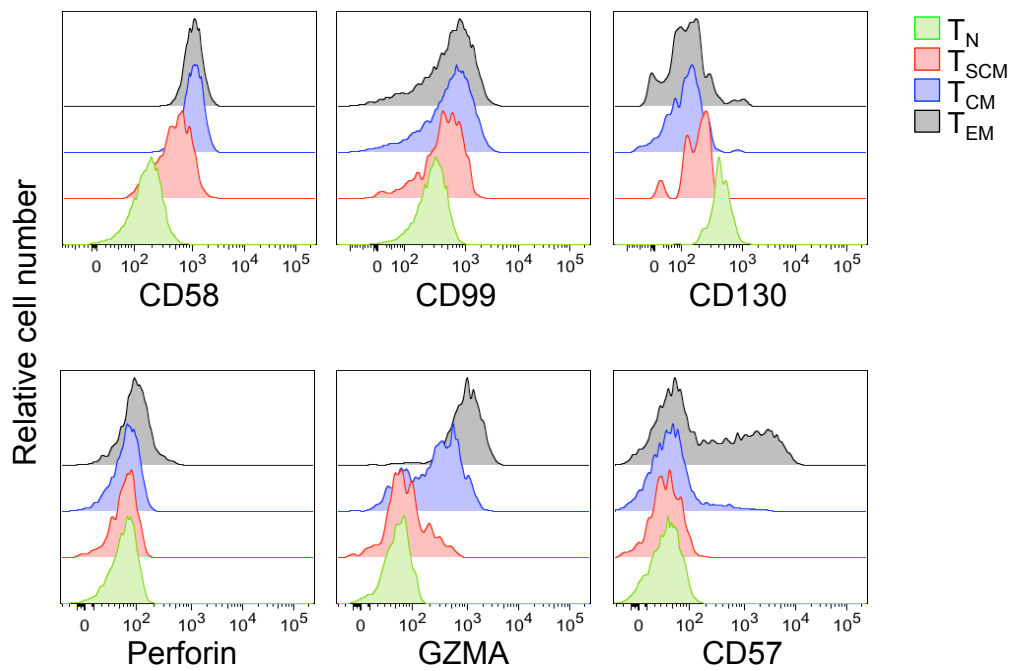

**Supplementary Fig. 9. Phenotypic characterization of T<sub>SCM</sub> cells.** Flow cytometry analysis of PBMC from a healthy donor. Overlaid histogram plots show expression levels of a given molecule in different CD8<sup>+</sup> T cell subsets.

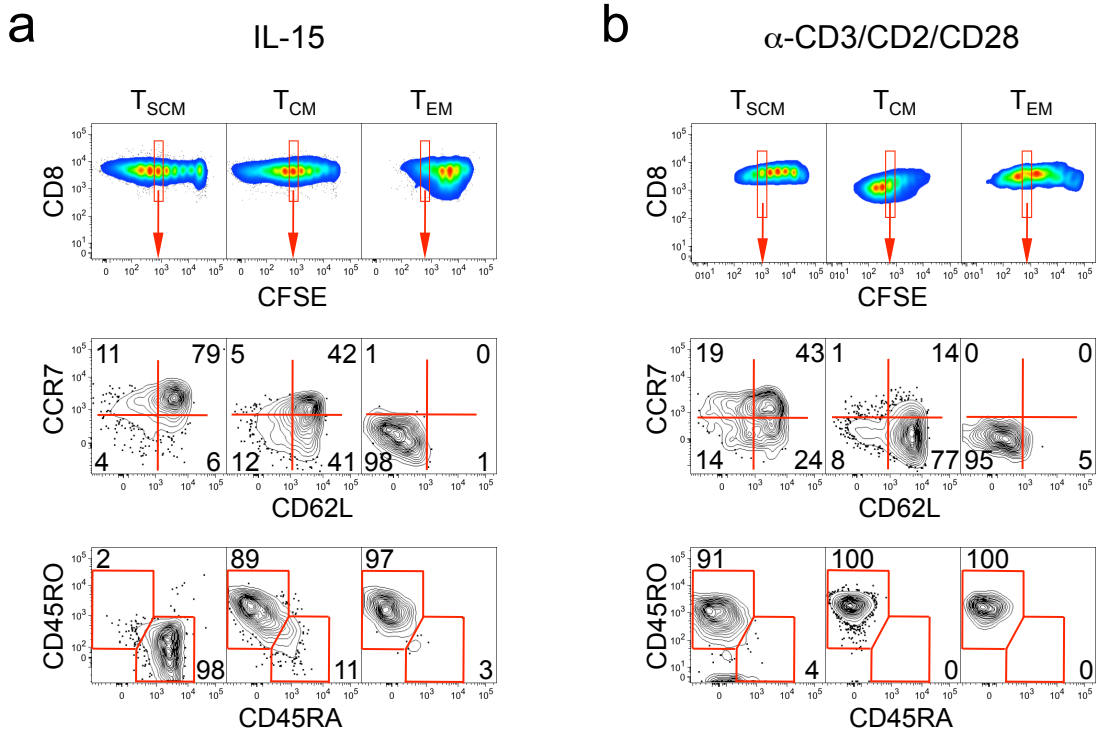

**Supplementary Fig. 10. Self-renewal and multipotency of T<sub>SCM</sub> cells.** **a**, CFSE dilution of sorted T<sub>SCM</sub>, T<sub>CM</sub> and T<sub>EM</sub> after exposure to 25ng ml<sup>-1</sup> of IL-15. Graphs show the phenotype of CD8<sup>+</sup> T cells that underwent 5 divisions in a representative experiment. **b**, CFSE dilution of sorted T<sub>SCM</sub>, T<sub>CM</sub> and T<sub>EM</sub> after stimulation with  $\alpha$ -CD3/CD2/CD28-coated beads. Dot plots show the phenotype of CD8<sup>+</sup> T cells that underwent 5 divisions in a representative experiment.

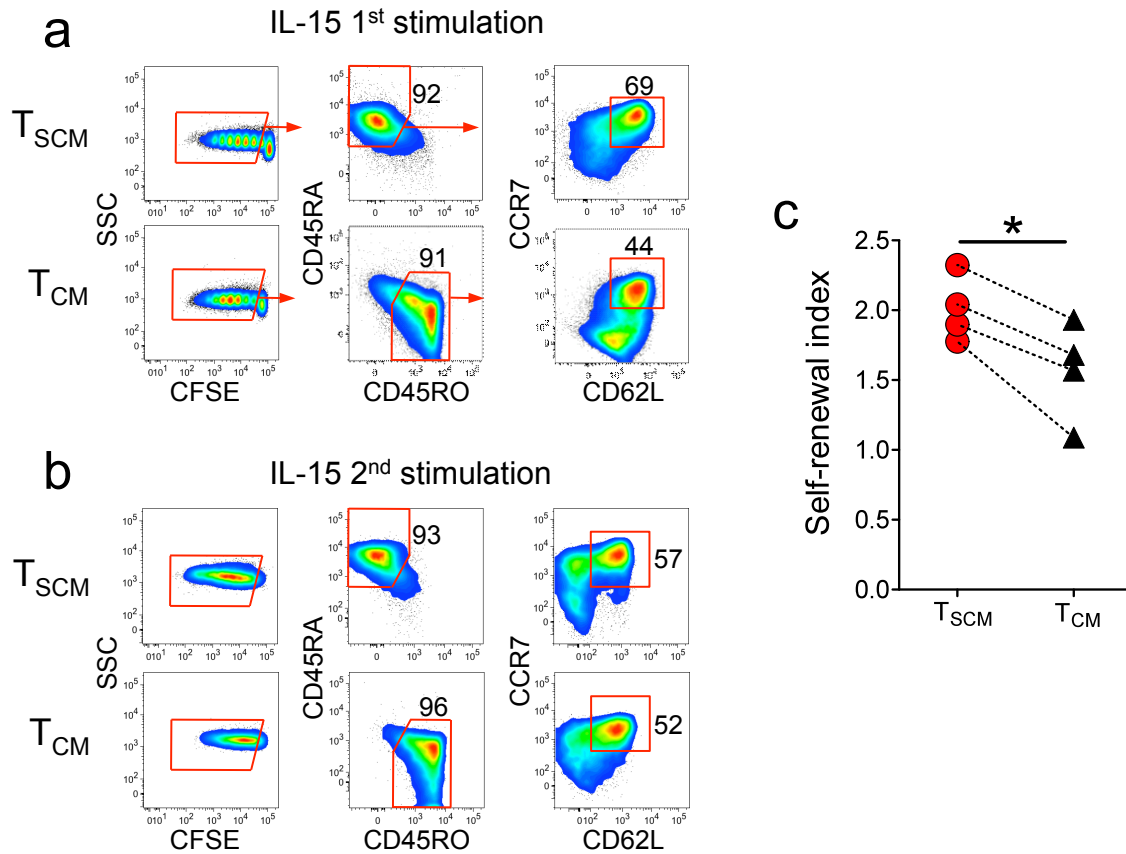

**Supplementary Fig. 11. Increased self-renewal of T<sub>SCM</sub> cells following secondary IL-15 stimulation. a,** Sorting strategy of CFSE-diluted T<sub>SCM</sub> and T<sub>CM</sub> after exposure to 25ng ml<sup>-1</sup> of IL-15. **b,** Flow cytometry analysis of sorted T<sub>SCM</sub> and T<sub>CM</sub> after a secondary stimulation with 25ng ml<sup>-1</sup> of IL-15. Dot plots show the phenotype of CFSE-diluted CD8<sup>+</sup> T cells in a representative experiment. **c,** Self-renewal Index (SI) of CD8<sup>+</sup> memory T cell subsets following secondary stimulation with 25ng ml<sup>-1</sup> of IL-15. SI was calculated as follows:  $SI = 2^{PI} P_{RP}$ , PI=Proliferation Index, P<sub>RP</sub>= Percent of cells retaining the input phenotype. Graph depicts the results from 4 healthy donors; \*p= <0.05

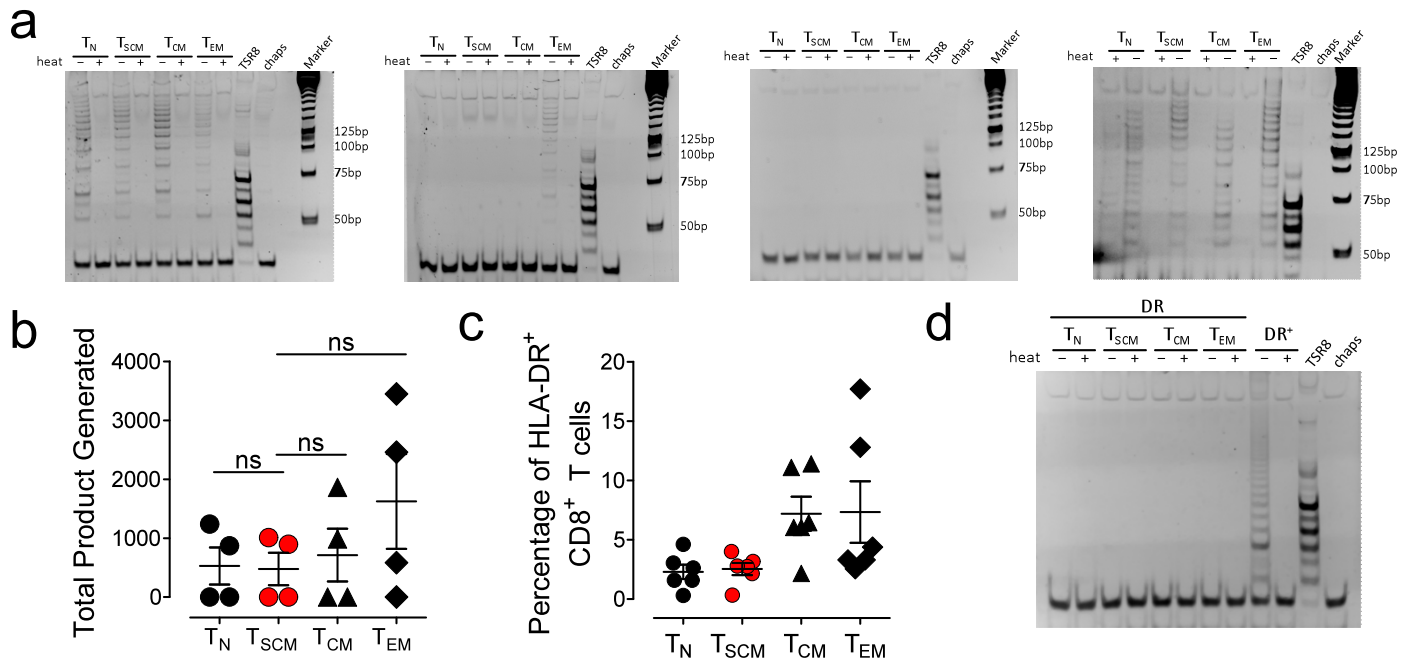

**Supplementary Figure 12 . Telomerase activity is reflective of recent cellular activation rather than a property of resting memory T cells. a,** Trapeze assay on CD8<sup>+</sup> T cell subsets from 4 healthy donors. **b,** Total Product Generated (TPG) in CD8<sup>+</sup> T cell subsets **c,** Percent of HLA-DR<sup>+</sup> cells in different CD8<sup>+</sup> T cell subsets. **d,** Trapeze assay of CD8<sup>+</sup> HLA-DR<sup>-</sup> T cell subsets and HLA-DR<sup>+</sup> bulk CD8<sup>+</sup> T cells from a representative healthy donor. Data are consistent with those found by Romero *et al.*<sup>1</sup>

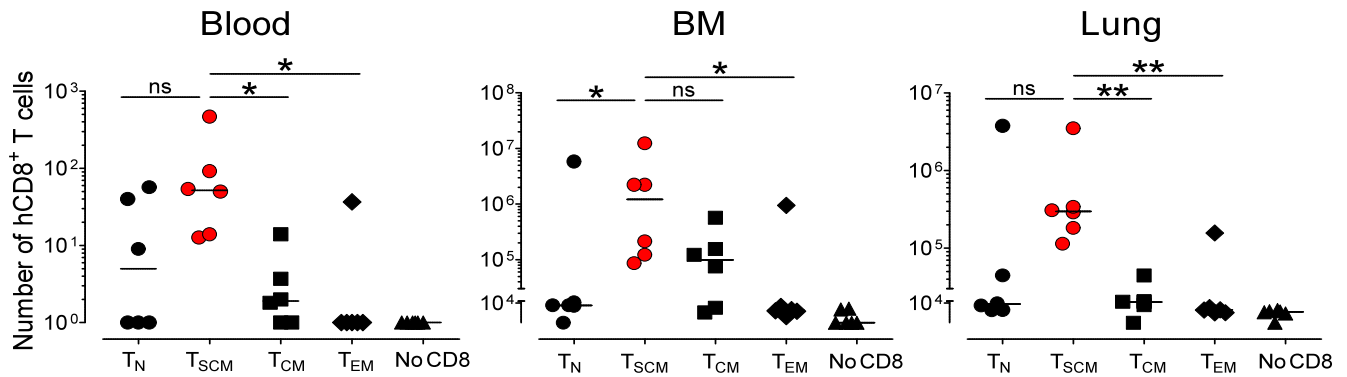

**Supplementary Fig. 13. T<sub>SCM</sub> cells reconstitute immunodeficient hosts more efficiently than other CD8<sup>+</sup> T-cell subsets.** Absolute human CD8<sup>+</sup> T cell recovery in the blood, bone marrow (BM) and lung of NSG mice 4 weeks following adoptive transfer of CD4<sup>+</sup> T cells with or without sorted CD8<sup>+</sup> T cell subsets. A total of 6 mice per T cell subset from two independent experiments (3 replicate mice per T cell subset/experiment) are shown. Horizontal bars indicate median values. ns= not significant \*= $p < 0.05$ ; \*\*= $p < 0.01$ .

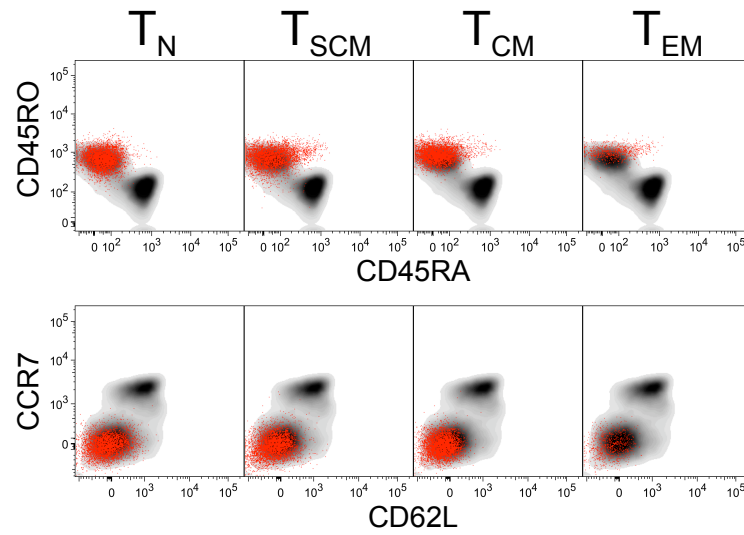

**Supplementary Fig. 14. Effector differentiation of human CD8<sup>+</sup> T cells following transfer in NSG mice.** Flow cytometry analysis of human T cells (in the spleen of a representative NSG mouse at 4 weeks following adoptive transfer of CD4<sup>+</sup> T cells ( $5 \times 10^6$ ) with or without sorted CD8<sup>+</sup> T cell subsets ( $1 \times 10^6$ )). Graphs show T cells (red dots) overlaid to lymphocytes from peripheral blood of a healthy donor shown as density plot.

**a**

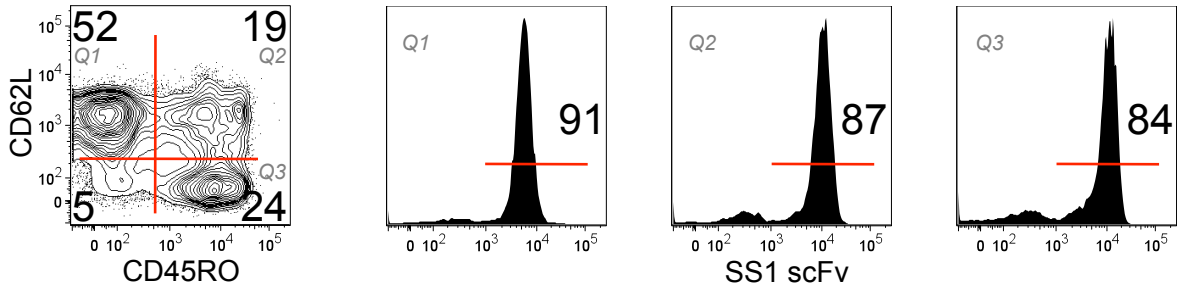

**b**

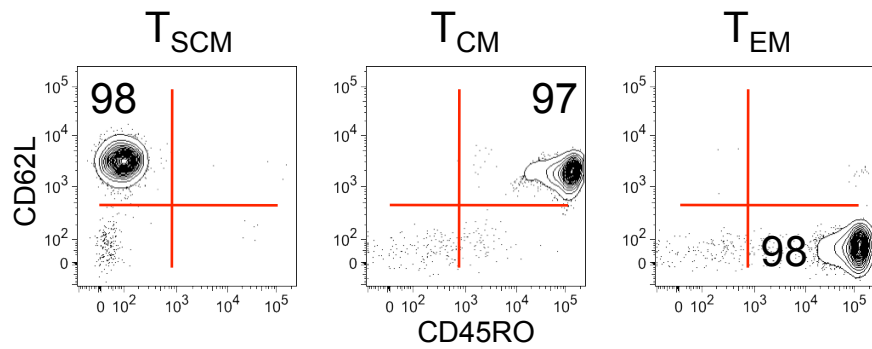

**Supplementary Fig. 15. Generation of mesothelin-specific CD8<sup>+</sup> T-cell memory subsets.** **a**, Flow cytometry analysis of enriched CD8<sup>+</sup> T cells transduced with the anti-mesothelin chimeric receptor SS1–BB:TCR- $\zeta$  after 17 days stimulation with  $\alpha$ -CD3/CD28-coated beads and IL-2 in the presence of TWS119. **b**, Flow cytometry analysis of CD8<sup>+</sup> T cell memory subsets after sorting with MACS positive selection Multisort kits.





# Supplementary Table 2 Differentially regulated genes among CD8+ T cell subsets

| Gene Symbol | p-value(T cell subtype) | p-value(TSCM vs. TN) | Fold-Change(TSCM vs. TN) | p-value(TSCM vs. TEM) | Fold-Change(TSCM vs. TEM) | p-value(TN vs. TEM) | Fold-Change(TN vs. TEM) | p-value(TSCM vs. TEM) | Fold-Change(TSCM vs. TEM) | p-value(TN vs. TEM) | Fold-Change(TN vs. TEM) |
|-------------|-------------------------|----------------------|--------------------------|-----------------------|---------------------------|---------------------|-------------------------|-----------------------|---------------------------|---------------------|-------------------------|
| 991E-08     | 0.0022627               | 1.6927               | 0.0012842                | 1.6927                | 0.00129176                | 3.06E-05            | 2.84134                 | 0.20612               | 2.84134                   | 0.20612             | 1.06189                 |
| THBS1       | 1.30E-07                | 0.0012839            | 2.22071                  | 0.539797              | 0.0026058                 | -2.37571            | 0.00062317              | -11.7726              | 1.84E-05                  | -4.85542            | -1.85213                |
| ADAM8       | 0.0004504               | 1.7278               | 1.0004504                | 1.7278                | 0.0004504                 | -2.45769            | 0.00117821              | -4.28523              | 0.00411281                | -4.28523            | 0.00411281              |
| CD58        | 0.000637                | 0.00471822           | 0.000637                 | 0.00471822            | 0.000637                  | -0.85231            | 0.000512303             | -0.79448              | 0.0016847                 | -0.79448            | 0.0016847               |
| SNORD115-42 | 5.42E-07                | 0.00507121           | 1.66351                  | 0.332156              | 0.0025897                 | 1.67957             | 0.00125824              | 1.61594               | 0.493039                  | 0.000825205         | 1.63154                 |
| ABO2        | 1.15E-02                | 0.0014776            | 1.15022                  | 0.0014776             | 1.15022                   | -1.28043            | 0.00075178              | -1.28043              | 0.00075178                | -1.28043            | 0.00075178              |
| MAN1A       | 1.42E-06                | 0.00176308           | 1.34504                  | 0.00176308            | 1.34504                   | -2.58619            | 0.00121487              | -1.5721               | 0.00220774                | -2.12866            | 0.00220774              |
| NSUN5B      | 1.53E-06                | 0.0061013            | 1.14155                  | 0.0012585             | 1.2194                    | 0.00089202          | 1.38545                 | 0.00148922            | 1.39201                   | 0.00210726          | 1.58156                 |
| PIRFBP2     | 1.70E-06                | 0.00097059           | 1.78024                  | 0.00097059            | 1.78024                   | 0.002002362         | 1.46844                 | 0.00191413            | 1.46844                   | 0.00191413          | 1.36234                 |
| FOSL2       | 1.78E-06                | 0.00031153           | 3.95086                  | 0.0217722             | 0.0015417                 | 1.67908             | 0.00129176              | 3.06E-05              | 2.84134                   | 0.20612             | 1.06189                 |
| NBEAL2      | 1.94E-06                | 0.00112484           | 2.22995                  | 0.0163264             | -2.38181                  | 2.52E-06            | 0.00027459              | -5.31132              | 0.00177255                | -7.49775            | 0.0048659               |
| MYL6        | 1.97E-06                | 0.00089762           | 3.93023                  | 0.0403337             | -1.57598                  | 0.0143397           | -5.95705                | -0.19395              | 0.00136838                | -23.4149            | 0.00620714              |
| SNORD115-26 | 1.98E-05                | 0.000498396          | 1.98925                  | 0.935878              | 1.00034                   | 0.00171497          | 1.8433                  | 0.00037234            | -2.04472                  | 1.48004             | 0.00891325              |
| CLND1D      | 2.17E-06                | 0.00427788           | 2.94177                  | 0.0176366             | 0.97318                   | 1.00185             | 0.00129176              | 3.64197               | 0.00530209                | -2.96334            | 0.0768838               |
| TM6D        | 2.51E-06                | 0.0044821            | 32.979                   | 0.174343              | -1.03011                  | 0.00250324          | -1.43937                | 0.0075545             | -33.663                   | 0.00286564          | -47.0371                |
| SD22A       | 2.51E-06                | 0.00120844           | 2.02574                  | 0.0010689             | -1.3314                   | 0.0049069           | -2.77655                | 0.0004498             | -2.69706                  | 0.0041488           | -6.52454                |
| NBEA        | 3.08E-06                | 0.00532862           | 3.62393                  | 0.898431              | 1.0011                    | 0.0101654           | 2.03419                 | 0.0081575             | 3.62792                   | 0.000182885         | 7.37175                 |
| SNORD115-6  | 3.45E-06                | 0.00666883           | 1.65258                  | 0.0636104             | 1.25916                   | 0.00268378          | 1.4459                  | 0.00274415            | -1.57307                  | 0.232622            | 1.02638                 |
| CHST11      | 3.49E-06                | 0.00364439           | 1.38419                  | 0.0286141             | -1.26324                  | 0.0146163           | -1.4403                 | 0.00345869            | 1.74857                   | 0.00290503          | -1.99364                |
| TM4D        | 3.51E-06                | 0.392733             | -1.1021                  | 0.00292324            | 3.31465                   | 0.0089716           | 4.46749                 | 0.00090144            | 3.65308                   | 0.002142            | 1.71279                 |
| AUTS2       | 3.55E-06                | 0.0006008            | 1.69322                  | 0.162588              | -2.62064                  | 0.00089842          | -8.96817                | 0.00065825            | -4.22058                  | 0.00175802          | -3.97876                |
| SNORD115-11 | 3.56E-06                | 0.00022654           | 1.97287                  | 0.790166              | -1.01425                  | 0.00287006          | 1.81534                 | 0.00305121            | -2.00088                  | 0.170102            | -1.08678                |
| SNORD115-11 | 3.56E-06                | 0.00022654           | 1.97287                  | 0.790166              | -1.01425                  | 0.00287006          | 1.81534                 | 0.00305121            | -2.00088                  | 0.170102            | -1.08678                |
| SNORD115-11 | 3.56E-06                | 0.00022654           | 1.97287                  | 0.790166              | -1.01425                  | 0.00287006          | 1.81534                 | 0.00305121            | -2.00088                  | 0.170102            | -1.08678                |
| PP4K2A      | 3.56E-06                | 0.00179862           | 1.06454                  | 0.0061658             | -1.06454                  | 0.0061658           | -1.06454                | -1.10719              | 0.00308296                | -1.10719            | -1.10719                |
| MYO1F       | 3.99E-06                | 0.0058135            | 2.86031                  | 0.052977              | 1.62044                   | -8.0066322          | -2.88121                | 0.00795721            | -8.49644                  | 0.00109004          | -8.49644                |
| SNORD115-12 | 4.48E-06                | 0.00053372           | 1.98743                  | 0.661634              | -1.02297                  | 0.00587459          | 1.807                   | 0.00164297            | -2.03308                  | 0.178951            | -1.09895                |
| SNORD115-12 | 4.48E-06                | 0.00053372           | 1.98743                  | 0.661634              | -1.02297                  | 0.00587459          | 1.807                   | 0.00164297            | -2.03308                  | 0.178951            | -1.09895                |
| SNORD115-12 | 4.48E-06                | 0.00053372           | 1.98743                  | 0.661634              | -1.02297                  | 0.00587459          | 1.807                   | 0.00164297            | -2.03308                  | 0.178951            | -1.09895                |
| SDK2        | 4.88E-06                | 0.00385422           | -2.12094                 | 0.00077969            | 1.60821                   | 0.0163392           | 2.24881                 | 0.0014058             | 3.41124                   | 0.00245489          | 4.7896                  |
| UNKNOWN     | 5.02E-06                | 0.00323405           | 2.73392                  | 0.189789              | 0.00347522                | -5.34257            | 0.00359932              | -3.31227              | 0.00112961                | -12.6282            | 0.00655749              |
| FAM129A     | 5.04E-06                | 0.0019155            | 0.46155                  | 0.0019155             | 0.46155                   | 0.0019155           | 0.46155                 | 0.27132               | 0.00705899                | 0.27132             | 0.00705899              |
| DNAJC1      | 5.88E-06                | 0.0037474            | 1.35392                  | 0.0220099             | -1.2568                   | 0.0088751           | -1.80865                | 0.00809715            | -1.70161                  | 0.0068035           | -2.44877                |
| FLJ13953    | 6.22E-06                | 0.0012951            | -2.2138                  | 0.024004              | 1.05294                   | 0.0404187           | 1.12959                 | 0.00278489            | 1.28603                   | 0.00144665          | 1.37963                 |
| AC079       | 6.41E-06                | 0.00097059           | 1.78024                  | 0.00097059            | 1.78024                   | 0.00097059          | 1.78024                 | 0.00097059            | 1.78024                   | 0.00097059          | 1.78024                 |
| TARP        | 6.41E-06                | 0.00192343           | 2.09912                  | 0.0239152             | -1.40396                  | 0.0132221           | -4.92327                | 0.00481382            | -2.95841                  | 0.00119677          | -10.3345                |
| GBP2        | 6.61E-06                | 0.00623545           | 1.39534                  | 0.5489                | 1.02481                   | 0.0184151           | -1.30428                | 0.00242522            | -1.30778                  | 0.00145891          | -1.7654                 |
| SELL        | 6.84E-06                | 0.001176             | 1.92568                  | 0.001176              | 1.92568                   | 0.001176            | 1.92568                 | 0.001176              | 1.92568                   | 0.001176            | 1.92568                 |
| HMG3B       | 6.94E-06                | 0.0155738            | 1.68247                  | 0.00082397            | -2.02835                  | 0.0018988           | 1.24741                 | 0.00743696            | -1.34784                  | 0.0574914           | -1.34784                |
| FOPX1       | 6.96E-06                | 0.00121515           | -1.3705                  | 0.008018              | 0.0013601                 | 1.4436              | 0.000916398             | 1.59299               | 0.00253209                | 1.97844             | 0.0188445               |
| EMR1A       | 7.02E-06                | 0.0014352            | 1.00183                  | 0.0014352             | 1.00183                   | 0.0014352           | 1.00183                 | 0.0014352             | 1.00183                   | 0.0014352           | 1.00183                 |
| LRRN1       | 7.33E-06                | 0.00329559           | -2.67153                 | 0.00083301            | 1.01163                   | 0.0244868           | 2.89665                 | 0.000610973           | 4.84648                   | 0.00324048          | 7.7848                  |
| WNT7A       | 7.97E-06                | 0.0241275            | 1.11277                  | 0.986515              | 1.00612                   | 0.00381162          | 2.48233                 | 0.133627              | -1.11095                  | 0.0013352           | 2.22077                 |
| RNF166      | 8.34E-06                | 0.00583847           | 1.44910                  | 0.00583847            | 1.44910                   | 0.00583847          | 1.44910                 | 0.00583847            | 1.44910                   | 0.00583847          | 1.44910                 |
| FAM38A      | 9.28E-06                | 0.0028923            | 2.03802                  | 0.0118389             | -1.57233                  | 0.0115776           | -1.71683                | 0.00656741            | -3.20444                  | 0.00197569          | -3.48892                |
| PTFRM       | 9.33E-06                | 0.00797741           | 2.1391                   | 0.0234441             | -2.16005                  | 0.00891706          | -4.74301                | 0.00644218            | -4.82186                  | 0.0024364           | -0.28721                |
| MAI         | 9.45E-06                | 0.00369117           | 1.65439                  | 0.00369117            | 1.65439                   | 0.00369117          | 1.65439                 | 0.00369117            | 1.65439                   | 0.00369117          | 1.65439                 |
| STR3A1      | 9.70E-06                | 0.0077112            | 3.9827                   | 0.122733              | -1.34792                  | 0.17017             | -1.04361                | 0.00061705            | -3.58386                  | 0.000483408         | -4.1564                 |
| IDS         | 9.70E-06                | 0.0036625            | 1.16934                  | 0.0232766             | -1.18879                  | 0.00335054          | -1.18879                | 0.00335054            | -1.18879                  | 0.00335054          | -1.18879                |
| JOSD1       | 9.70E-06                | 0.00797741           | 2.1391                   | 0.0234441             | -2.16005                  | 0.00891706          | -4.74301                | 0.00644218            | -4.82186                  | 0.0024364           | -0.28721                |
| CLSTN3      | 1.01E-05                | 0.00890614           | 1.53354                  | 0.0764763             | -1.34947                  | 0.0172097           | -1.99443                | 0.00422362            | -2.09484                  | 0.00200357          | -3.05869                |
| IRF8        | 1.02E-05                | 0.0123566            | 1.64251                  | 0.00140133            | -1.26333                  | 0.00120308          | -1.09111                | 0.0074909             | -2.07504                  | 0.0063982           | -1.78216                |
| PRF8        | 1.02E-05                | 0.0123566            | 1.64251                  | 0.00140133            | -1.26333                  | 0.00120308          | -1.09111                | 0.0074909             | -2.07504                  | 0.0063982           | -1.78216                |
| LRIG1       | 1.06E-05                | 0.0089325            | 2.58571                  | 0.085408              | 0.0297177                 | -1.23479            | 0.00323754              | -3.52707              | 0.00468887                | -3.1828             | 0.25104                 |
| PLND1       | 1.10E-05                | 0.00372958           | 3.96404                  | 0.008104              | -2.0415                   | 0.0084936           | -4.06917                | 0.0269567             | -8.05279                  | 0.00178859          | -19.2139                |
| HBST1       | 1.10E-05                | 0.00372958           | 3.96404                  | 0.008104              | -2.0415                   | 0.0084936           | -4.06917                | 0.0269567             | -8.05279                  | 0.00178859          | -19.2139                |
| CACNB3      | 1.28E-05                | 0.0073627            | 1.35941                  | 0.0105111             | -1.68772                  | 0.00130565          | -2.30777                | 0.0142975             | -2.35507                  | 0.0031627           | -3.2203                 |
| MYB         | 1.27E-05                | 0.017835             | 1.39819                  | 0.0088121             | 2.96185                   | 0.0021667           | 6.88021                 | 0.0373774             | 2.22376                   | 0.00171711          | 6.51711                 |
| DCO4        | 1.30E-05                | 0.0014352            | 1.00183                  | 0.0014352             | 1.00183                   | 0.0014352           | 1.00183                 | 0.0014352             | 1.00183                   | 0.0014352           | 1.00183                 |
| RHOH        | 1.31E-05                | 0.00235656           | -1.3093                  | 0.0193259             | 1.06238                   | 0.00517862          | 1.39088                 | 0.0153207             | 1.39088                   | 0.00080369          | 1.83109                 |
| FAM113A     | 1.33E-05                | 0.00143708           | -1.2745                  | 0.014515              | 1.15454                   | 0.014088            | 1.40921                 | 0.00400793            | 1.47602                   | 0.0108941           | 1.68589                 |
| SNORD115-20 | 1.33E-05                | 0.00143708           | -1.2745                  | 0.014515              | 1.15454                   | 0.014088            | 1.40921                 | 0.00400793            | 1.47602                   | 0.0108941           | 1.68589                 |
| NP1         | 1.40E-05                | 0.0023133            | 1.63156                  | 0.03474               | 0.00065103                | -3.14888            | 0.00082624              | -2.19733              | 0.00617869                | -5.1376             | 0.0058172               |
| MXRAT       | 1.42E-05                | 0.0053305            | 1.46491                  | 0.0653788             | -1.25857                  | 0.00732335          | -2.02843                | 0.00266262            | -1.84237                  | 0.00551176          | -2.97148                |
| SC7B        | 1.50E-05                | 0.0019155            | 0.46155                  | 0.0019155             | 0.46155                   | 0.0019155           | 0.46155                 | 0.0019155             | 0.46155                   | 0.0019155           | 0.46155                 |
| ATG2A       | 1.56E-05                | 0.0022061            | 1.24664                  | 0.135856              | -1.0953                   | 0.0231172           | -1.26128                | 0.000293133           | -1.35887                  | 0.00103101          | -1.5648                 |
| ZNF238      | 1.56E-05                | 0.0023962            | 1.14016                  | 0.0082134             | 1.14537                   | 0.0010317           | 2.21422                 | 0.0017633             | 3.05951                   | 0.00255176          | 2.52457                 |
| NP1         | 1.56E-05                | 0.0022061            | 1.24664                  | 0.135856              | -1.0953                   | 0.0231172           | -1.26128                | 0.000293133           | -1.35887                  | 0.00103101          | -1.5648                 |
| NCAHP       | 1.68E-05                | 0.00784854           | 2.76333                  | 0.0144006             | -3.90517                  | 0.0420337           | -2.74215                | 0.00124699            | -10.7874                  | 0.00519856          | -7.54772                |
| OCH2        | 1.68E-05                | 0.0063401            | -1.03388                 | 0.032784              | 1.15258                   | 0.00140659          | 2.93399                 | 0.194078              | 1.19182                   | 0.000646608         | 3.03338                 |
| CHTRF       | 1.68E-05                | 0.0063401            | -1.03388                 | 0.032784              | 1.15258                   | 0.00140659          | 2.93399                 | 0.194078              | 1.19182                   | 0.000646608         | 3.03338                 |
| PHACTR2     | 1.68E-05                | 0.0197976            | 2.1235                   | 0.00015425            | -2.3582                   | 0.00214872          | -2.98937                | 0.00646335            | -5.00763                  | 0.00268193          | -6.34793                |
| CTSP1       | 1.68E-05                | 0.0029861            | -1.05071                 | 0.00087799            | -1.10893                  | 0.00630572          | -1.33986                | 0.00816778            | -1.0554                   | 0.00487595          | -1.27519                |
| HIF1-3A     | 1.68E-05                | 0.0029861            | -1.05071                 | 0.00087799            | -1.10893                  | 0.00630572          | -1.33986                | 0.00816778            | -1.0554                   | 0.00487595          | -1.27519                |
| UNKNOWN     | 1.78E-05                | 0.00497872           | 1.73441                  | 0.093414              | 1.17683                   | 6.35E-05            | 1.78281                 | 0.0005932             | -1.4738                   | 0.662793            | 1.01948                 |
| ADCY5       | 1.84E-05                | 0.0018301            | 1.27208                  | 0.0134048             | -1.11972                  | 0.0107422           | -2.0838                 | 0.0231401             | -1.42438                  | 0.00106477          | -2.65077                |
| EPHA4       | 2.00E-05                | 0.000451534          | 1.03023                  | 0.0059008             | -1.45813                  | 0.61864             | -1.16331                | 0                     |                           |                     |                         |

|           |             |             |           |            |            |             |            |             |            |             |            |            |           |         |
|-----------|-------------|-------------|-----------|------------|------------|-------------|------------|-------------|------------|-------------|------------|------------|-----------|---------|
| RGMB      | 6.39E-06    | 0.0786522   | -1.42335  | 0.10852    | -1.05236   | 0.0066771   | 1.94006    | 0.0619359   | 1.35253    | 0.0082802   | 2.76137    | 0.00712346 | 2.04164   |         |
| 15F17H    | 6.02E-06    | 0.0786522   | -1.42335  | 0.10852    | -1.05236   | 0.0066771   | 1.94006    | 0.0619359   | 1.35253    | 0.0082802   | 2.76137    | 0.00712346 | 2.04164   |         |
| CFE9B     | 6.50E-05    | 0.25325     | -1.10398  | 0.80564    | -1.02092   | 0.0021362   | 2.26061    | 0.431534    | 1.17207    | 0.00678429  | 2.49659    | 0.00222545 | 2.21429   |         |
| PRRL      | 6.50E-05    | 0.25325     | -1.10398  | 0.80564    | -1.02092   | 0.0021362   | 2.26061    | 0.431534    | 1.17207    | 0.00678429  | 2.49659    | 0.00222545 | 2.21429   |         |
| PK74      | 0.008174    | 0.031055    | 2.12998   | 0.0046213  | -3.43362   | 0.0242373   | -8.68834   | 0.00200866  | -9.25719   | 0.00894646  | -18.5059   | 0.129653   | -2.00225  |         |
| 16K74     | 0.008174    | 0.031055    | 2.12998   | 0.0046213  | -3.43362   | 0.0242373   | -8.68834   | 0.00200866  | -9.25719   | 0.00894646  | -18.5059   | 0.129653   | -2.00225  |         |
| 6.70E-05  | 0.031055    | 2.12998     | 0.0046213 | -3.43362   | 0.0242373  | -8.68834    | 0.00200866 | -9.25719    | 0.00894646 | -18.5059    | 0.129653   | -2.00225   |           |         |
| SNDR115-1 | 6.94E-05    | 0.0117041   | 1.64891   | 0.565028   | 1.04113    | 0.0179727   | 1.53743    | 0.00528886  | -1.58376   | 0.260942    | -0.107251  | 0.00112887 | 1.47668   |         |
| SNDR115-1 | 6.94E-05    | 0.0117041   | 1.64891   | 0.565028   | 1.04113    | 0.0179727   | 1.53743    | 0.00528886  | -1.58376   | 0.260942    | -0.107251  | 0.00112887 | 1.47668   |         |
| SNDR115-1 | 6.94E-05    | 0.0117041   | 1.64891   | 0.565028   | 1.04113    | 0.0179727   | 1.53743    | 0.00528886  | -1.58376   | 0.260942    | -0.107251  | 0.00112887 | 1.47668   |         |
| PRM1      | 7.34E-05    | 0.0304914   | 3.57947   | 0.017462   | -1.90451   | 0.0126655   | -5.26597   | 0.0144421   | -6.81716   | 0.00906542  | -18.8494   | 0.0654196  | -2.76489  |         |
| FNDR153B  | 7.45E-05    | 0.0291436   | 3.42678   | 0.016993   | -1.85204   | 0.0126655   | -5.26597   | 0.0144421   | -6.81716   | 0.00906542  | -18.8494   | 0.0654196  | -2.76489  |         |
| PNR153B   | 7.45E-05    | 0.0291436   | 3.42678   | 0.016993   | -1.85204   | 0.0126655   | -5.26597   | 0.0144421   | -6.81716   | 0.00906542  | -18.8494   | 0.0654196  | -2.76489  |         |
| YFGB      | 0.0185665   | 0.0234919   | -1.31998  | 0.0785665  | -1.17451   | 0.0040013   | 1.28432    | 0.0120522   | 1.55033    | 0.00789048  | 1.69528    | 0.122598   | 1.09325   |         |
| TNP3      | 7.39E-05    | 0.021607    | 5.32963   | 0.0024919  | -1.7867    | 0.0487888   | -3.08583   | 0.0110076   | -9.57576   | 0.00697884  | -16.4463   | 0.14262    | -1.7175   |         |
| SCDS      | 0.0287573   | 1.24504     | 0.0116796 | -1.87333   | 0.476676   | -1.07026    | 0.0131351  | -2.98002    | 0.0147281  | -1.94807    | 0.00877324 | 1.55038    | 1.0066613 |         |
| 7.72E-05  | 0.0287573   | 1.24504     | 0.0116796 | -1.87333   | 0.476676   | -1.07026    | 0.0131351  | -2.98002    | 0.0147281  | -1.94807    | 0.00877324 | 1.55038    | 1.0066613 |         |
| GFFT2     | 7.91E-05    | 0.127771    | 1.42217   | 0.0825789  | -2.50871   | 0.00251449  | -15.1223   | 0.0133483   | -3.56781   | 0.0076656   | -21.5066   | 0.050043   | -6.02793  |         |
| LOIN      | 7.94E-05    | 0.0237674   | 1.81655   | 0.0509171  | -1.83255   | 0.0146549   | -2.4704    | 0.00601402  | -2.98489   | 0.0164204   | -4.79342   | 0.0346614  | -2.08728  |         |
| EMB       | 8.00E-05    | 0.0592665   | 1.14865   | 0.0322222  | -1.13522   | 0.0391293   | -1.35236   | 0.00698274  | -1.51798   | 0.00668412  | -1.598342  | 0.227713   | -1.0556   |         |
| SNDR109A  | 8.14E-05    | 0.0161184   | -1.81824  | 0.181475   | 1.10307    | 0.0046372   | 1.1622     | 0.0108313   | 2.06565    | 0.0146253   | 2.11315    | 0.116852   | 1.0536    |         |
| SNDR109A  | 8.14E-05    | 0.0161184   | -1.81824  | 0.181475   | 1.10307    | 0.0046372   | 1.1622     | 0.0108313   | 2.06565    | 0.0146253   | 2.11315    | 0.116852   | 1.0536    |         |
| SNDR109A  | 8.14E-05    | 0.0161184   | -1.81824  | 0.181475   | 1.10307    | 0.0046372   | 1.1622     | 0.0108313   | 2.06565    | 0.0146253   | 2.11315    | 0.116852   | 1.0536    |         |
| HSFB      | 8.20E-05    | 0.0114372   | 2.44435   | 0.0200724  | -1.0204    | 0.000274191 | 2.79013    | 0.0191146   | -4.08708   | 0.056643    | 1.19414    | 0.01391    | 4.68524   |         |
| PTG8E2    | 8.27E-05    | 0.0145536   | 3.57687   | 0.0727158  | 1.1741     | 0.025767    | -1.75137   | 0.0104511   | -3.04647   | 0.016503    | -6.26442   | 0.0343928  | -2.05629  |         |
| PTFR1     | 8.27E-05    | 0.0229142   | 2.34668   | 0.00262562 | -1.29106   | 0.0262866   | -1.55175   | 0.0137746   | -3.5459    | 0.014488    | -3.70043   | 0.8656495  | 1.21131   |         |
| NETO2     | 8.29E-05    | 0.0013246   | 3.22444   | 0.024466   | -1.02639   | 0.0267930   | -1.48338   | 0.0079307   | -7.78951   | 0.0107949   | -12.4472   | 0.27863    | -1.8741   |         |
| SLC27A2   | 8.37E-05    | 0.000461133 | 3.38665   | 0.431135   | 0.328427   | 1.12724     | 0.0102803  | -3.87953    | 0.0107161  | -2.98828    | 0.0107161  | 1.29781    | 1.29781   |         |
| QGDH      | 8.44E-05    | 0.0024981   | 1.91856   | 0.0438978  | -1.23622   | 0.0170372   | -1.19662   | 0.00373731  | -2.31716   | 0.015272    | -1.52717   | 0.683224   | 1.06278   |         |
| CAHM2     | 8.50E-05    | 0.0158978   | 1.85088   | 0.250143   | -1.02626   | 0.0259952   | -1.48338   | 0.0079307   | -7.78951   | 0.0107949   | -12.4472   | 0.27863    | -1.8741   |         |
| UNKNOWN   | 8.52E-05    | 0.0030284   | 1.89049   | 0.0712011  | -1.27441   | 0.288089    | -1.07432   | 0.00808461  | -2.41492   | 0.00416942  | -2.20398   | 0.276215   | 1.19094   |         |
| 8.60E-05  | 0.0119841   | -1.07927    | 0.133876  | 1.12505    | 0.0114155  | 1.72979     | 0.103872   | 1.12423     | 0.00973022 | 1.86891     | 0.00814420 | 1.53752    | 1.53752   |         |
| TECC3     | 8.60E-05    | 0.0119841   | -1.07927  | 0.133876   | 1.12505    | 0.0114155   | 1.72979    | 0.103872    | 1.12423    | 0.00973022  | 1.86891    | 0.00814420 | 1.53752   | 1.53752 |
| ACTN1     | 8.89E-05    | 0.0183899   | -1.67706  | 0.0244633  | -2.27728   | 0.0152869   | 17.8448    | 0.0108189   | 3.81909    | 0.0104555   | 30.0944    | 0.0457959  | 7.87989   |         |
| TNFRSF10D | 9.15E-05    | 0.0011848   | 1.17294   | 0.0014308  | -1.31713   | 0.0104841   | 1.83683    | 0.00628972  | 2.25719    | 0.0153686   | 3.14947    | 0.0606424  | 1.3953    |         |
| NRCAM     | 9.28E-05    | 0.0046907   | 1.60833   | 0.042478   | -1.04292   | 0.0454924   | -1.54878   | 0.00269266  | -1.96649   | 0.00269266  | -1.96649   | 0.3841649  | 1.06219   |         |
| PLFN12L   | 9.28E-05    | 0.0046907   | 1.60833   | 0.042478   | -1.04292   | 0.0454924   | -1.54878   | 0.00269266  | -1.96649   | 0.00269266  | -1.96649   | 0.3841649  | 1.06219   |         |
| 8.31E-05  | 0.0059994   | 1.63088     | 0.494224  | -1.03051   | 0.0509989  | -1.43295    | 0.0153142  | -1.86937    | 0.0328844  | -2.32997    | 0.00662519 | -1.39053   | 1.39053   |         |
| PKAZ2     | 9.31E-05    | 0.0059994   | 1.63088   | 0.494224   | -1.03051   | 0.0509989   | -1.43295   | 0.0153142   | -1.86937   | 0.0328844   | -2.32997   | 0.00662519 | -1.39053  | 1.39053 |
| SYNE2     | 9.37E-05    | 0.0062851   | 1.14101   | 0.176121   | -1.2194    | 0.0171406   | -1.35416   | 0.0248853   | -1.39135   | 0.00458954  | -1.54511   | 0.110739   | -1.110739 |         |
| ARL4C     | 9.37E-05    | 0.0062851   | 1.14101   | 0.176121   | -1.2194    | 0.0171406   | -1.35416   | 0.0248853   | -1.39135   | 0.00458954  | -1.54511   | 0.110739   | -1.110739 |         |
| PAS       | 9.50E-05    | 0.0038198   | 0.64981   | 0.0119785  | -1.81016   | 0.10336     | -2.04996   | 0.0048502   | -10.949    | 0.0154631   | -12.3994   | 0.670708   | -1.32447  |         |
| FFR1R15A  | 9.50E-05    | 0.0038198   | 0.64981   | 0.0119785  | -1.81016   | 0.10336     | -2.04996   | 0.0048502   | -10.949    | 0.0154631   | -12.3994   | 0.670708   | -1.32447  |         |
| 9.84E-05  | 0.025872    | -1.07661    | 0.50407   | 1.04057    | 0.00416751 | -1.55189    | 0.15291    | 1.12997     | 0.0624058  | 1.44746     | 0.0064368  | 1.18234    | 1.18234   |         |
| CIDEB     | 9.84E-05    | 0.025872    | -1.07661  | 0.50407    | 1.04057    | 0.00416751  | -1.55189   | 0.15291     | 1.12997    | 0.0624058   | 1.44746    | 0.0064368  | 1.18234   | 1.18234 |
| ABO3C     | 9.88E-05    | 0.0191844   | -1.21225  | 0.103557   | -1.09911   | 0.190042    | 1.05917    | 0.0119451   | 1.10295    | 2.48E-05    | -1.22428   | 0.0439901  | -1.5834   |         |
| LGA5B-05  | 9.88E-05    | 0.0191844   | -1.21225  | 0.103557   | -1.09911   | 0.190042    | 1.05917    | 0.0119451   | 1.10295    | 2.48E-05    | -1.22428   | 0.0439901  | -1.5834   | 1.5834  |
| MPR2B     | 0.00010192  | 0.0143906   | -1.57057  | 0.0563466  | -1.26201   | 0.524174    | 1.03401    | 0.0212791   | 1.98207    | 0.0212791   | 1.98207    | 0.113142   | -1.2205   |         |
| SNDR109A  | 0.000105425 | 0.0578888   | 1.58764   | 0.0467981  | -1.41077   | 0.0012057   | -1.71087   | 0.00037217  | -2.23799   | 0.0147421   | -2.62639   | 0.130691   | -1.12773  |         |
| CAHM2     | 0.000106933 | 0.0510436   | 1.49821   | 0.163001   | -1.14509   | 0.0163001   | -1.46251   | 0.00094924  | -1.19662   | 0.00269266  | -1.96649   | 0.3841649  | 1.06219   |         |
| FXO3B     | 0.00010782  | 2.37E-05    | 1.12719   | 0.341855   | 1.02477    | 0.0271159   | -1.23211   | 0.0395966   | -1.09995   | 0.0106812   | -1.38883   | 0.0213308  | -1.26283  |         |
| ARLPR1    | 0.000108891 | 0.012682    | 1.20313   | 0.0197925  | -1.14255   | 0.0294896   | -1.32837   | 0.0169427   | -1.37463   | 0.0063312   | -1.5982    | 0.0489017  | -1.16284  |         |
| PCYOX1L   | 0.000108891 | 0.012682    | 1.20313   | 0.0197925  | -1.14255   | 0.0294896   | -1.32837   | 0.0169427   | -1.37463   | 0.0063312   | -1.5982    | 0.0489017  | -1.16284  |         |
| BCL9      | 0.00011084  | 0.0356847   | -2.27703  | 0.75978    | 1.04818    | 0.0486884   | 2.19311    | 0.012616    | 1.33343    | 0.000246249 | 1.75899    | 0.0587470  | 1.27215   |         |
| CALM      | 0.00011084  | 0.0356847   | -2.27703  | 0.75978    | 1.04818    | 0.0486884   | 2.19311    | 0.012616    | 1.33343    | 0.000246249 | 1.75899    | 0.0587470  | 1.27215   |         |
| YYH11     | 0.000110803 | 0.0175112   | 5.12875   | 0.13887    | -1.32085   | 0.158548    | -1.91206   | 0.00197847  | -6.77429   | 0.00119598  | -9.80649   | 0.25848    | -1.4476   |         |
| KNO7A4D   | 0.000112396 | 0.0304212   | -1.1488   | 0.703714   | 1.0488     | 0.0176314   | 2.67605    | 0.203334    | 1.20486    | 0.091017    | 3.07426    | 0.00748204 | 2.55155   |         |
| STAB3     | 0.000112396 | 0.0304212   | -1.1488   | 0.703714   | 1.0488     | 0.0176314   | 2.67605    | 0.203334    | 1.20486    | 0.091017    | 3.07426    | 0.00748204 | 2.55155   |         |
| UNKNOWN   | 0.000113772 | 0.0054949   | 1.60949   | 0.0811305  | -1.28544   | 0.0225122   | -1.06435   | 0.0143009   | -2.0688    | 0.0135381   | -1.71305   | 0.0757026  | 1.20721   |         |
| TMPO      | 0.000115497 | 0.0071152   | -1.10563  | 0.150183   | 1.07398    | 0.0260752   | 1.30511    | 0.0120139   | 1.18742    | 0.0276988   | 1.44296    | 0.0260687  | 1.21253   |         |
| NEK6      | 0.0001156   | 0.0043908   | 0.71839   | 0.0449289  | -1.07391   | 0.172713    | 1.32929    | 0.0123813   | 1.02687    | 0.0135381   | 1.64336    | 0.0135381  | 1.33679   |         |
| ANAPC13   | 0.000116102 | 0.120966    | -1.06369  | 0.0259844  | -1.70002   | 0.00392157  | 1.21714    | 0.0689376   | 1.12753    | 0.0106105   | 1.29466    | 0.0120754  | 1.18234   |         |
| ETV6      | 0.000116328 | 0.0019181   | 1.84454   | 0.012518   | -1.23921   | 0.15319     | 1.09973    | 0.00512845  | -2.28577   | 0.0125888   | -1.68779   | 0.112858   | 1.38156   |         |
| SCARNA17  | 0.000117029 | 0.0048454   | -1.05458  | 1.79E-05   | -1.13406   | 0.106407    | 1.25041    | 0.00865322  | 1.19596    | 0.022763    | 1.31866    | 0.0632959  | 1.1026    |         |
| UNKNOWN   | 0.000120199 | 0.0173185   | -1.51961  | 0.0640377  | -1.55882   | 0.126407    | 1.32041    | 0.000881185 | 1.76096    | 0.00464291  | 2.03847    | 0.133725   | 1.16816   |         |
| MURP      | 0.000120199 | 0.0173185   | -1.51961  | 0.0640377  | -1.55882   | 0.126407    | 1.32041    | 0.000881185 | 1.76096    | 0.00464291  | 2.03847    | 0.133725   | 1.16816   |         |
| SLC6A6    | 0.000120567 | 0.000782064 | 1.1857    | 0.0805415  | -1.29033   | 0.00678554  | -1.82689   | 0.0334587   | -1.52995   | 0.00478215  | -2.16615   | 0.0888227  | -1.41583  |         |
| COTL1     | 0.000121454 | 0.00129303  | 1.60261   | 0.00809958 | -1.42394   | 0.073549    | -1.20319   | 0.00918174  | -2.28202   | 0.041092    |            |            |           |         |

|          |             |             |          |            |           |            |            |            |            |             |            |            |
|----------|-------------|-------------|----------|------------|-----------|------------|------------|------------|------------|-------------|------------|------------|
| ZFAND1   | 0.000219262 | 0.02261679  | -1.24167 | 0.026876   | 0.0164322 | 1.29932    | 0.0020899  | 1.39828    | 0.00855467 | 1.61333     | 0.02278013 | 1.1989     |
| RUC3     | 0.000200044 | 0.00000000  | -1.17443 | 0.000000   | 0.0000000 | 2.37201    | 0.00145819 | 2.76681    | 0.00233561 | 2.76681     | 0.00233561 | 2.19707    |
| MF4      | 0.000200262 | 0.0147358   | 1.48967  | 0.0130032  | -1.25304  | 0.00717109 | -1.20627   | -1.86661   | 0.0302361  | -1.79964    | 0.415072   | -1.79964   |
| OLFM2    | 0.000202051 | 0.0253651   | 1.76899  | 0.078233   | -1.03761  | 0.02026436 | 1.47238    | 0.0024655  | 1.70488    | 0.00874539  | 2.06463    | 0.0391688  |
| CRNF17   | 0.00021714  | 0.00000000  | -1.07136 | 0.000000   | 0.0000000 | 1.44641    | 0.0017435  | 1.44641    | 0.0017435  | 1.5007139   | 1.5007139  | 1.38518    |
| TRDK     | 0.000225575 | 0.00213519  | 1.52139  | 0.0013761  | 1.51166   | 0.00025575 | 1.56741    | -1.06644   | 0.662628   | -1.06644    | 0.662628   | 1.03688    |
| DCLB1D   | 0.00022622  | 0.0101759   | 1.96776  | 0.289785   | -1.05735  | 0.0061913  | -1.61371   | 0.0031225  | -2.00861   | 0.0204186   | -1.37539   | 0.0065522  |
| RALDZD1  | 0.000226281 | 0.00000000  | -1.07136 | 0.000000   | 0.0000000 | 1.44641    | 0.0017435  | 1.44641    | 0.0017435  | 1.5007139   | 1.5007139  | 1.38518    |
| HEG1     | 0.000230811 | 0.0170726   | -1.03925 | 0.00042617 | -1.22175  | 0.0202737  | -2.25755   | -0.0074256 | -1.17561   | 0.0194386   | -1.84778   | 0.0377746  |
| UNKNOWN  | 0.000232772 | 0.0311512   | -1.11511 | 0.071347   | 1.408     | 0.407757   | 1.02033    | 0.00070208 | 1.24032    | 0.0191555   | 1.13779    | 0.064542   |
| FCZB1G   | 0.000233571 | 0.00000000  | -1.07136 | 0.000000   | 0.0000000 | 1.44641    | 0.0017435  | 1.44641    | 0.0017435  | 1.5007139   | 1.5007139  | 1.38518    |
| BTG3     | 0.00023571  | 0.0292327   | 1.23261  | 0.0099314  | 1.00175   | 0.0195225  | -1.49325   | 0.0162573  | -1.48036   | 0.0249093   | -1.48036   | 0.0374539  |
| RG2      | 0.00023591  | 0.023738    | 3.9777   | 0.366924   | -1.22759  | 0.159816   | -2.0389    | 0.00624704 | -4.88297   | 0.00336624  | -8.11014   | -1.00037   |
| METAP2   | 0.00023784  | 0.0314184   | -1.27177 | 0.142578   | -1.04477  | 0.151369   | 0.09635    | 0.00562023 | 1.21791    | 0.000233213 | 1.39423    | 0.00760463 |
| LB1      | 0.00023822  | 0.0544299   | 1.36006  | 0.161228   | -1.12122  | 0.00399376 | -1.59278   | 0.0191229  | -1.52492   | -1.26829    | -0.483309  | -1.42059   |
| NHSL2    | 0.00023993  | 0.0825481   | 1.21507  | 0.00278193 | -1.4211   | 0.0191935  | -3.57467   | 0.0177345  | -1.72787   | 0.0559789   | -4.34634   | 0.0319714  |
| ZSCAN2   | 0.000239673 | 0.0555105   | 1.12146  | 0.0265714  | -1.12739  | 0.00196066 | 0.55428    | 0.00196066 | 0.55428    | 0.0147404   | -1.6324    | 0.00791766 |
| ITPK     | 0.00023984  | 0.12106     | -1.04749 | 0.53431    | 1.05308   | 0.0178985  | 1.54502    | 0.206548   | 1.10309    | 0.00998595  | 1.61838    | 0.00623089 |
| MEM1B    | 0.000241673 | 0.132324    | 1.09556  | 0.294375   | 1.08926   | 5.08E-05   | 1.69342    | 0.0654412  | -1.0012    | 0.0202648   | 1.55428    | 1.55428    |
| TKBP1    | 0.00024268  | 0.0023956   | 1.87071  | 0.501156   | -1.09357  | 0.0241556  | -1.9014    | 0.0160235  | -1.97631   | 0.00719592  | -3.48223   | 0.00995403 |
| NHNP1L   | 0.000242837 | 0.0320315   | 1.30121  | 0.00207277 | -2.91008  | 0.0311274  | -3.13523   | 0.0431311  | -3.92026   | 0.0299005   | -4.30976   | -1.07377   |
| CLC1     | 0.00024302  | 0.0190335   | 1.05302  | 0.0791307  | 0.0168467 | 1.14666    | 0.0371992  | 1.20289    | 0.0013852  | 1.20289     | 0.0013852  | 1.20289    |
| TOP1MT   | 0.000244073 | 0.0373826   | -1.24591 | 0.0635893  | -1.30778  | 0.0327802  | 1.6036     | 0.0233519  | 1.62929    | 0.0148462   | 1.99794    | 0.00840042 |
| CDC4     | 0.000246097 | 0.00491813  | 1.74567  | 0.0019718  | 1.10157   | 0.0167672  | -1.67878   | 0.00379304 | -2.14548   | 0.00403491  | -2.9625    | 0.020625   |
| CDC4A    | 0.000246866 | 0.0132734   | 1.60498  | 0.0132734  | 1.02929   | 0.0191411  | -1.40298   | 0.0191411  | -1.63211   | 0.00705536  | -1.93678   | -1.19217   |
| FCBP     | 0.000248274 | 0.10171     | -1.25196 | 0.029132   | 2.14024   | 0.0124866  | 3.45584    | 0.0047738  | 3.01753    | 0.0180877   | 4.23559    | 0.0453866  |
| GGTP3    | 0.000249808 | 0.00000000  | 1.09489  | 0.00886336 | -1.39152  | 0.0354869  | -1.39155   | 0.01499704 | -1.52329   | 0.00126377  | -1.52329   | 0.0099776  |
| NKX1     | 0.000249819 | 0.00000000  | 1.09489  | 0.00886336 | -1.39152  | 0.0354869  | -1.39155   | 0.01499704 | -1.52329   | 0.00126377  | -1.52329   | 0.0099776  |
| ARHGAP18 | 0.000250961 | 0.12805     | -1.09446 | 0.166281   | -1.18196  | 0.00299012 | 1.84043    | 0.146122   | 1.29384    | 0.00906876  | 1.60002    | 0.0202506  |
| SYT11    | 0.000252172 | 0.010633    | 2.73681  | -1.57767   | -1.57767  | 0.101028   | -1.57933   | 0.0176724  | -3.17476   | 0.0257945   | -4.32201   | 0.962214   |
| TRBP1    | 0.00025392  | 0.00000000  | -1.07136 | 0.000000   | 0.0000000 | 1.44641    | 0.0017435  | 1.44641    | 0.0017435  | 1.5007139   | 1.5007139  | 1.38518    |
| GATM     | 0.000254382 | 0.0044068   | -1.60419 | 0.103338   | 1.43981   | 0.0785185  | 1.66718    | 0.00645667 | 2.30753    | 0.00429564  | 2.67448    | 0.0381517  |
| PRP1     | 0.00025739  | 0.0302019   | 1.23368  | 0.0447407  | -1.79574  | 0.0153324  | -6.8196    | 0.0262762  | -2.11538   | 0.0191516   | -1.61221   | -3.86873   |
| RFP25    | 0.000259379 | 0.00000000  | -1.07136 | 0.000000   | 0.0000000 | 1.44641    | 0.0017435  | 1.44641    | 0.0017435  | 1.5007139   | 1.5007139  | 1.38518    |
| UNKNOWN  | 0.000260177 | 0.0203375   | 1.25458  | 0.450187   | -1.05915  | 0.00887356 | 1.5803     | 0.0692711  | -1.32879   | 0.0881076   | 1.26864    | 0.00127073 |
| PELL1    | 0.000261168 | 0.0107768   | 1.44276  | 0.0698226  | 1.42619   | 0.00116701 | 2.3008     | 0.0080821  | -1.01162   | 0.0278541   | 1.59437    | 0.0294242  |
| UNKNOWN  | 0.000261604 | 0.00000000  | -1.07136 | 0.000000   | 0.0000000 | 1.44641    | 0.0017435  | 1.44641    | 0.0017435  | 1.5007139   | 1.5007139  | 1.38518    |
| AK5      | 0.000262019 | 0.0143577   | -4.69939 | 0.124661   | 1.8169    | 0.0384468  | 0.833465   | 0.00166457 | 1.58383    | 0.0148797   | 18.0244    | 0.112196   |
| STR3A8   | 0.000261962 | 0.470914    | 1.12635  | 0.0933295  | -2.44753  | 0.0141034  | -18.9712   | 0.114817   | -2.74411   | 0.0225999   | -19.1663   | 0.00396569 |
| OPR125   | 0.000262005 | 0.00000000  | -1.07136 | 0.000000   | 0.0000000 | 1.44641    | 0.0017435  | 1.44641    | 0.0017435  | 1.5007139   | 1.5007139  | 1.38518    |
| GKNT4    | 0.000262768 | 0.347567    | -1.15561 | 0.990765   | -1.00243  | 0.0101718  | 4.41521    | 0.20347    | 1.15281    | 0.017741    | 5.10226    | 0.0266986  |
| PLK4     | 0.000270402 | 0.0032455   | 1.45764  | 0.0031515  | -2.21279  | 0.00487623 | -4.62896   | 0.0255336  | -3.22545   | 0.0117963   | -6.74443   | 0.0116667  |
| C7orf44  | 0.00027114  | 0.073033    | 1.01435  | 0.0294964  | 0.0294964 | 0.0294964  | 1.41087    | 0.00000000 | 1.4038     | 0.0038283   | 0.043471   | 1.24912    |
| ABI3     | 0.000271914 | 0.0143577   | -4.69939 | 0.124661   | 1.8169    | 0.0384468  | 0.833465   | 0.00166457 | 1.58383    | 0.0148797   | 18.0244    | 0.112196   |
| UNKNOWN  | 0.000272757 | 0.496003    | -1.03232 | 0.101239   | -1.17777  | 0.0017798  | -1.63173   | 0.0124227  | -1.14082   | 0.002116035 | -1.58094   | 0.0439926  |
| INPFA    | 0.000273473 | 0.0195565   | 1.39256  | 0.0329797  | 1.32448   | 0.0038438  | 0.0038438  | 0.0038438  | 1.97517    | 0.0038438   | 1.97517    | 0.0038438  |
| NJUM1    | 0.000273742 | 0.0696486   | -1.07559 | 0.0224224  | 1.12604   | 0.0319599  | 1.2149     | 0.0252211  | 1.21116    | 0.00900053  | 1.30674    | 0.13473    |
| LDLRAP1  | 0.00027625  | 0.11118     | -2.0467  | 0.0193153  | 1.415     | 0.0179851  | 2.37171    | 0.0418662  | 1.7046     | 0.0257716   | 2.85712    | 0.0183807  |
| NCR1     | 0.000276344 | 0.00000000  | -1.07136 | 0.000000   | 0.0000000 | 1.44641    | 0.0017435  | 1.44641    | 0.0017435  | 1.5007139   | 1.5007139  | 1.38518    |
| PPP1R16B | 0.000279294 | 0.129842    | 1.16973  | 0.0137779  | -2.03817  | 0.0210405  | -2.49887   | 0.0263138  | -2.3841    | 0.0294049   | -2.92299   | 0.069058   |
| CHD9     | 0.000279931 | 0.254395    | 0.354395 | 0.0166952  | -1.25135  | 0.0153329  | -1.5292    | 0.0432084  | -1.34702   | 0.0162825   | -1.64612   | 0.0158635  |
| PRKSI1   | 0.000280115 | 0.00000000  | -1.07136 | 0.000000   | 0.0000000 | 1.44641    | 0.0017435  | 1.44641    | 0.0017435  | 1.5007139   | 1.5007139  | 1.38518    |
| EIF1AX   | 0.000281148 | 0.00562772  | 1.26519  | 0.0387269  | 1.06627   | 0.367722   | 1.05542    | 0.00763348 | 1.34904    | 0.00767382  | 1.860297   | -1.01029   |
| ARHGAP19 | 0.000281989 | 0.012783    | 1.75225  | 0.152726   | -1.31471  | 0.0205522  | -2.52609   | 0.00407281 | -2.30299   | 0.0143144   | -4.42634   | 0.10009    |
| TAF9     | 0.000282008 | 0.0169044   | 1.74967  | 0.0169044  | 1.74967   | 0.0169044  | 1.74967    | 0.0169044  | 1.74967    | 0.0169044   | 1.74967    | 0.0169044  |
| CRK186   | 0.000284026 | 0.0190976   | -2.29245 | 0.188533   | -1.25766  | 0.0695473  | -1.29346   | 0.00387844 | 1.8228     | 0.00931462  | 1.77233    | 0.498195   |
| BEND5    | 0.000285001 | 0.0315387   | -1.36523 | 0.280231   | 1.24888   | 0.00210697 | 2.47705    | 0.0382196  | 1.70501    | 0.00631391  | 3.37328    | 0.0110441  |
| TRPAK2   | 0.000285917 | 0.00000000  | -1.07136 | 0.000000   | 0.0000000 | 1.44641    | 0.0017435  | 1.44641    | 0.0017435  | 1.5007139   | 1.5007139  | 1.38518    |
| FAM153C  | 0.000288111 | 0.125067    | -1.48591 | 0.0180384  | 1.35104   | 0.0312759  | -1.24074   | 0.0305747  | 2.02103    | 0.0169101   | 3.29727    | 0.0443718  |
| GTPBP1   | 0.000289568 | 0.0299996   | 1.14716  | 0.0587907  | -1.7451   | 0.0034261  | -2.20418   | 0.035112   | -1.34738   | 0.00129468  | -1.43365   | 0.035228   |
| ENP2     | 0.00029003  | 0.00000000  | -1.07136 | 0.000000   | 0.0000000 | 1.44641    | 0.0017435  | 1.44641    | 0.0017435  | 1.5007139   | 1.5007139  | 1.38518    |
| KCTD12   | 0.00029434  | 0.00771714  | -1.57605 | 0.0512504  | 1.14083   | 0.043797   | 2.28979    | 0.00130735 | 1.78801    | 0.0169101   | 3.60725    | 0.0488003  |
| MBD4T1   | 0.000297813 | 0.00038784  | 1.83845  | 0.0288904  | -1.59938  | 0.0064536  | -2.48837   | 0.00918767 | -2.94037   | 0.0136203   | -4.57474   | 0.173106   |
| PTPNB3   | 0.000299222 | 0.00000000  | -1.07136 | 0.000000   | 0.0000000 | 1.44641    | 0.0017435  | 1.44641    | 0.0017435  | 1.5007139   | 1.5007139  | 1.38518    |
| LDNB     | 0.000302582 | 0.119173    | -1.11997 | 0.487175   | 1.14003   | 0.0026819  | 2.06919    | 0.127475   | 1.2768     | 0.00292002  | 2.31744    | 0.0345872  |
| OCM      | 0.000303243 | 0.889032    | 1.01035  | 0.489878   | 1.17453   | 0.0079928  | 2.28912    | 0.437306   | 1.1625     | 0.0104886   | 3.91909    | 0.0107688  |
| KCNMB5   | 0.000304525 | 0.00000000  | -1.07136 | 0.000000   | 0.0000000 | 1.44641    | 0.0017435  | 1.44641    | 0.0017435  | 1.5007139   | 1.5007139  | 1.38518    |
| ILSR     | 0.000306473 | 0.000425002 | 1.27573  | 0.0086405  | -2.7395   | 0.0847807  | -1.63759   | 0.00534571 | -3.49486   | 0.0431312   | -2.08912   | 0.113002   |
| ILR      | 0.000306473 | 0.000425002 | 1.27573  | 0.0086405  | -2.7395   | 0.0847807  | -1.63759   | 0.00534571 | -3.49486   | 0.0431312   | -2.08912   | 0.113002   |
| UNKNOWN  | 0.000307483 | 0.00000000  | -1.07136 | 0.000000   | 0.0000000 | 1.44641    | 0.0017435  | 1.44641    | 0.0017435  | 1.5007139   | 1.5007139  | 1.38518    |
| UBASH3B  | 0.000308744 | 0.0638312   | -1.16409 | 0.174246   | 1.14205   | 0.00885522 | 1.19633    | 0.0120336  | 1.32945    | 0.0156464   | 1.8217     | 0.0635385  |
| UNKNOWN  | 0.000309619 | 0.0170679   | 1.34402  | 0.0273599  | 1.06496   | 0.0098967  | 1.5842     | 0.0203786  | 1.20062    | 0.0236104   | 1.65015    | 1.051      |



|          |             |            |            |             |             |             |             |             |             |             |             |            |            |
|----------|-------------|------------|------------|-------------|-------------|-------------|-------------|-------------|-------------|-------------|-------------|------------|------------|
| PPP2R3C  | 0.00073878  | 0.0691134  | 1.174455   | 0.00669284  | -1.1919     | 0.000073042 | -1.2655     | 0.037263    | -2.07576    | 0.0289228   | -2.20402    | 0.0674855  | -1.06179   |
| UNKNWNV  | 0.00000000  | 0.00000000 | 0.00000000 | 0.00000000  | 0.00000000  | 0.00000000  | -0.261118   | 0.00255958  | -0.00000000 | 0.00000000  | -0.00000000 | 0.00000000 | -2.68209   |
| X12or23  | 0.00074068  | 0.0107203  | 1.54155    | 0.270991    | 1.13108     | 0.315728    | 1.04844     | 0.0115613   | 1.71409     | 0.0111101   | 1.58885     | 0.542035   | -0.78833   |
| DGKA     | 0.000746754 | 0.0651991  | 1.157676   | 0.591232    | -1.0639     | 0.0232115   | 1.39471     | 0.373707    | 1.08832     | 0.0123087   | 1.61489     | 0.014388   | 1.48384    |
| PLD3     | 0.00075706  | 0.00000000 | 0.00000000 | 0.00000000  | -0.00000000 | 0.00000000  | -0.00000000 | 0.00000000  | 0.00000000  | 0.00000000  | -11.6271    | 0.0440823  | -8.15785   |
| PLD2     | 0.000749291 | 0.06574051 | 1.18664    | 0.0023113   | 1.2187      | 0.370989    | 1.02215     | 0.314731    | 1.06276     | -1.02215    | 1.047146    | 0.00210036 | -1.2457    |
| TCEA5    | 0.000750085 | 0.132447   | -1.2415    | 0.0485313   | 1.36901     | 0.0219086   | 3.48335     | 0.0209511   | 1.69838     | 0.0318984   | 4.32457     | 0.0661447  | 2.54629    |
| C4ORF324 | 0.000752671 | 0.00000000 | 0.00000000 | 0.00000000  | 0.00000000  | 0.00000000  | -0.233147   | 0.00000000  | -0.233147   | 0.00000000  | -0.233147   | 0.00000000 | -0.233147  |
| SH3BP1   | 0.000759076 | 0.162926   | 1.16295    | 0.136569    | 1.16456     | 0.0125835   | 1.64307     | 0.0726539   | 1.64307     | 0.00903962  | 1.51132     | 0.100556   | 1.41132    |
| UNKNWNV  | 0.000759862 | 0.168497   | -1.83333   | 0.0199748   | 1.21628     | 0.0648152   | 2.11626     | 0.0169007   | 3.99852     | 0.0126445   | 3.8798      | 0.038705   | -1.02312   |
| TOX1     | 0.00076185  | 0.00000000 | 0.00000000 | 0.00000000  | 0.00000000  | 0.00000000  | -1.11321    | 0.00000000  | 0.00000000  | 0.00000000  | -1.081      | 0.020518   | 1.020518   |
| PAK1     | 0.000761302 | 0.00514123 | -1.96047   | 1.16054     | 1.30534     | 0.999919    | 1.00025     | 0.00430618  | 1.00025     | 0.00378761  | 1.56092     | 0.0732972  | 1.56092    |
| UNKNWNV  | 0.000761593 | 0.0030585  | -1.99901   | 0.544012    | 1.14954     | 0.130622    | 1.51364     | 0.0172956   | 2.29794     | 0.00715727  | 3.02578     | 0.00879112 | 1.31674    |
| LRRAP4P  | 0.00076599  | 0.0134905  | 1.83643    | 0.169596    | 1.85136     | 0.0420116   | -21.386     | 0.045622    | 0.0306111   | 0.0306111   | 0.0306111   | 0.0277327  | -11.4779   |
| ATCAY    | 0.000769543 | 0.0063701  | -1.21683   | 0.000646891 | 1.33185     | 0.366099    | -1.06107    | 0.0369703   | -1.09453    | 0.110798    | -0.38716    | 0.0370176  | 1.54449    |
| RARB     | 0.000769817 | 0.01157    | 1.11632    | 0.228175    | -1.03413    | 0.117747    | -1.10375    | 0.0112812   | -1.15442    | 0.0230477   | -1.28214    | 0.0674434  | -1.06732   |
| GGLT3    | 0.000771613 | 0.115663   | 1.12537    | 0.557597    | -1.03688    | 0.02042022  | -1.23947    | 0.0313229   | -1.16687    | 0.0146691   | 1.36219     | 0.0646056  | -1.19539   |
| CSH5     | 0.000771853 | 0.0191212  | 1.15917    | 0.156601    | 1.05974     | 0.156601    | 1.05974     | 0.0071792   | 1.30324     | 0.0071792   | 1.107054    | 0.0384632  | 1.23242    |
| VDR2     | 0.000776434 | 0.0037146  | -1.22421   | 0.665738    | 1.00389     | 0.111903    | -1.02356    | 0.0019774   | 1.22897     | 0.0338658   | 1.19603     | 0.150365   | -1.02754   |
| PP4R4    | 0.00077616  | 0.0071415  | -1.28555   | 0.108641    | -1.02207    | 0.0314078   | 1.42793     | 0.107739    | 1.22297     | 0.0244504   | 1.18371     | 0.0373149  | 1.50229    |
| WIPF1    | 0.000783381 | 0.0471522  | -1.18951   | 0.0430397   | 1.34747     | 0.0269818   | 3.20509     | 0.0042975   | 1.60148     | 0.0292487   | 3.89249     | 0.0756342  | 2.3796     |
| USH2A    | 0.000787702 | 0.0125808  | 1.35852    | 0.0797227   | 1.15982     | 0.0283286   | 1.21113     | 0.0604767   | -1.17132    | 0.0844411   | -1.1217     | 0.069873   | 1.04424    |
| GPR153   | 0.000790992 | 0.0023669  | -2.01558   | 0.452274    | -1.12549    | 0.374422    | 1.18266     | 0.0045917   | 1.79884     | 0.0143395   | 2.30375     | 0.050995   | 1.32516    |
| UBAP3    | 0.00079438  | 0.9822548  | 1.00148    | 0.21091     | 1.18317     | 0.00570433  | -1.70471    | 0.225564    | -1.9605     | 0.00555473  | -1.70887    | 0.0513431  | -1.4408    |
| SAMD3    | 0.000797309 | 0.441774   | -1.02801   | 0.566135    | -1.05032    | 0.0284806   | -1.56142    | 0.0157045   | -1.0237     | 0.0224899   | -1.52183    | 0.0158858  | -1.48661   |
| PPAD4    | 0.00081386  | 0.00440409 | -1.06822   | 0.0309456   | -1.12736    | 0.0042996   | 1.12736     | 0.0042996   | 1.59948     | 0.00414702  | 1.7965      | 0.26011    | 1.25884    |
| ABL1     | 0.000814337 | 0.16865    | 1.10264    | 0.48625     | -1.05171    | 0.011589    | -1.61152    | 0.0044766   | -1.15967    | 0.0271034   | -1.77899    | 0.0596578  | -1.55226   |
| GCLT1B   | 0.000814629 | 0.019715   | -1.17415   | 0.0261273   | -1.08382    | 0.220176    | -1.04003    | 0.0049495   | 1.06905     | 0.0305026   | -1.12863    | 0.0152681  | -1.06604   |
| WIPF1    | 0.00081502  | 0.019715   | -1.17415   | 0.0261273   | -1.08382    | 0.220176    | -1.04003    | 0.0049495   | 1.06905     | 0.0305026   | -1.12863    | 0.0152681  | -1.06604   |
| UNKNWNV  | 0.000820606 | 0.00070162 | -1.97554   | 0.0290031   | 1.36908     | 0.133105    | 1.64239     | 0.00215203  | 2.70876     | 0.0306927   | 3.24954     | 0.435133   | 1.19963    |
| ZBT1     | 0.000820287 | 0.0344767  | 1.25961    | 0.939008    | 1.00428     | 0.00000000  | 1.01449     | 0.000583545 | -1.25426    | 0.00747202  | -1.24162    | 0.0117108  | 1.01019    |
| BRM43    | 0.00082694  | 0.00000000 | 0.00000000 | 0.00000000  | 0.00000000  | 0.00000000  | 0.00000000  | 0.00000000  | 0.00000000  | 0.00000000  | 0.00000000  | 0.00000000 | 0.00000000 |
| HCN3     | 0.000829418 | 0.0678271  | 1.20889    | 0.104409    | -1.17387    | 0.0899191   | -1.18552    | 0.0164499   | -1.41907    | 0.000273089 | -1.43316    | 0.051604   | -1.00993   |
| MLL1     | 0.000829432 | 0.0627169  | 1.32693    | 0.201876    | -1.1995     | 0.0143674   | -1.95004    | 0.0730993   | -1.57908    | 0.0255399   | -1.53767    | 0.081862   | -1.44443   |
| CHORD4   | 0.00083071  | 0.00000000 | 0.00000000 | 0.00000000  | 0.00000000  | 0.00000000  | 0.00000000  | 0.00000000  | 0.00000000  | 0.00000000  | 0.00000000  | 0.00000000 | 0.00000000 |
| APBA2    | 0.000830796 | 0.0170104  | -1.55431   | 1.01482     | 1.02462     | 0.0239041   | 3.26437     | 0.00945143  | 2.21437     | 0.021907    | 0.07384     | 0.122349   | 2.29132    |
| ACBD4    | 0.000834876 | 0.0370875  | -1.23368   | 0.70104     | 1.10487     | 0.0044963   | 1.29896     | 0.0319149   | 1.25899     | 0.0198135   | 1.39241     | 0.125309   | 1.10782    |
| UNKNWNV  | 0.00083564  | 0.00000000 | 0.00000000 | 0.00000000  | 0.00000000  | 0.00000000  | -2.20274    | 0.00000000  | -2.20274    | 0.00000000  | -2.20274    | 0.0466124  | -2.20274   |
| RPS3A    | 0.000835154 | 0.082882   | -1.19908   | 0.526035    | -1.03378    | 0.00424618  | 1.20865     | 0.0300389   | 1.23934     | 0.0169163   | 1.44928     | 0.066458   | 1.16984    |
| DCD1     | 0.000835781 | 0.0308997  | 1.26535    | 0.272389    | -1.12978    | 0.0279152   | 1.71172     | 0.0174189   | -1.45217    | 0.126258    | 1.33172     | 0.00069062 | 1.39838    |
| MROX3    | 0.00083753  | 0.00000000 | 0.00000000 | 0.00000000  | 0.00000000  | 0.00000000  | 1.21759     | 0.00000000  | 1.66865     | 0.0186289   | 1.95831     | 0.00000000 | 1.95831    |
| UTP20    | 0.000839226 | 0.0144448  | -1.33355   | 0.703185    | -1.02937    | 0.150868    | 1.24518     | 0.00448263  | 1.2955      | 0.013376    | 1.6605      | 0.0186587  | 1.28174    |
| SPCS2    | 0.000839742 | 0.0117832  | 1.08128    | 0.0054563   | -1.14168    | 0.007835    | -1.40535    | 0.00000000  | -1.23448    | 0.0263024   | -1.15198    | 0.00676721 | -1.20095   |
| HSR7     | 0.000840916 | 0.00000000 | 0.00000000 | 0.00000000  | 0.00000000  | 0.00000000  | 1.42645     | 0.00000000  | 1.42645     | 0.0338767   | 1.42645     | 1.19373    | 1.19373    |
| NEK3     | 0.00084072  | 0.675759   | -1.02538   | 0.0242004   | -1.89769    | 0.0349709   | -1.77068    | 0.0393372   | -1.87022    | 0.0280815   | -1.72685    | 0.503251   | -1.07173   |
| C16orf74 | 0.000840769 | 0.150518   | -1.23781   | 0.0084638   | 1.51285     | 0.0498952   | 1.91854     | 0.0163523   | 1.87262     | 0.0267633   | 2.37478     | 0.17099    | 1.28816    |
| PRKDI    | 0.00084398  | 0.00000000 | 0.00000000 | 0.00000000  | 0.00000000  | 0.00000000  | 0.8795139   | 0.00000000  | 0.8795139   | 0.0219336   | 0.26356     | 0.024836   | -3.44445   |
| KIAA0040 | 0.000849772 | 0.0127152  | -1.78653   | 0.0573431   | -1.16264    | 0.0545414   | -1.69252    | 0.0224168   | 1.53584     | 0.0143812   | 1.05331     | 0.007829   | -1.45811   |
| KIAA1998 | 0.000850232 | 0.0117182  | -1.61777   | 0.191451    | 1.072       | 0.0253345   | 1.57372     | 0.0051596   | 1.2733      | 0.0306011   | 1.81411     | 0.0270252  | 1.42474    |
| KORD3    | 0.000850234 | 0.00000000 | 0.00000000 | 0.00000000  | 0.00000000  | 0.00000000  | -1.45443    | 0.00000000  | -1.45443    | 0.0119249   | -1.62819    | 0.162819   | -1.62819   |
| DMXL2    | 0.000852819 | 0.0149403  | -1.45828   | 0.115016    | -1.15385    | 0.135787    | 1.32455     | 0.0380043   | 1.28834     | 0.0113328   | 1.93156     | 0.056684   | 1.52833    |
| VNGL1    | 0.000853003 | 0.0349405  | 1.07365    | 0.0220727   | -1.73905    | 0.0651147   | -1.69176    | 0.0137812   | -1.86713    | 0.0306201   | -1.81636    | 0.0679597  | 1.02795    |
| MEG2     | 0.000853033 | 0.0143174  | -1.45828   | 0.115016    | -1.15385    | 0.135787    | 1.32455     | 0.0380043   | 1.28834     | 0.0113328   | 1.93156     | 0.056684   | 1.52833    |
| KLF6     | 0.000858276 | 0.0197142  | 1.216284   | 0.146202    | -1.25459    | 0.13903     | -1.47524    | 0.0352004   | -2.71414    | 0.0110528   | -1.39188    | 0.0121678  | -1.17965   |
| LRP10    | 0.000859226 | 0.00897803 | 1.143      | 0.091196    | -1.03328    | 0.0702507   | -1.15738    | 0.00000000  | -1.11014    | 0.0146342   | -1.32273    | 0.0141949  | -1.17965   |
| GALT1    | 0.000859355 | 0.00000000 | 0.00000000 | 0.00000000  | 0.00000000  | 0.00000000  | 1.23095     | 0.00000000  | 1.4668108   | 0.00000000  | 1.4668108   | -1.17696   | 1.4668108  |
| SLC22A17 | 0.000859619 | 0.161901   | -1.57915   | 0.0358696   | -1.36991    | 0.0035326   | 2.66651     | 0.0657385   | 2.16328     | 0.0183057   | 4.21081     | 0.0533111  | 1.84649    |
| ALOX5AP  | 0.000859794 | 0.2006     | -1.2352    | 0.0088599   | -1.36399    | 0.0271138   | -4.20016    | 0.0474545   | -2.56151    | 0.0207969   | -4.00307    | 0.418584   | -1.94649   |
| KRTAP5-2 | 0.000860398 | 0.00000000 | 0.00000000 | 0.00000000  | 0.00000000  | 0.00000000  | 1.42748     | 0.00000000  | 1.42748     | 0.00000000  | 1.42748     | 0.00000000 | 1.42748    |
| CD9      | 0.000860398 | 0.0096884  | 1.13199    | 0.242135    | -1.07219    | 0.0299143   | -1.11117    | 7.23E-05    | -1.21371    | 0.0101859   | -1.25784    | 0.0276611  | -1.03636   |
| C2OR9    | 0.000860971 | 0.0116507  | 1.74156    | 0.33532     | -1.07472    | 0.108097    | -1.26798    | 0.0176869   | -1.8717     | 0.0369249   | -2.20827    | 0.244654   | -1.17982   |
| UNKNWNV  | 0.000861364 | 0.00000000 | 0.00000000 | 0.00000000  | 0.00000000  | 0.00000000  | 0.84192     | 0.00000000  | 0.84192     | 0.00000000  | 0.84192     | 0.062829   | 0.84192    |
| TWISTNB  | 0.000861564 | 0.0016886  | -1.31036   | 0.0143782   | -1.12082    | 0.26994     | 1.09735     | 0.0325225   | 1.16911     | 0.0359175   | 1.43793     | 0.0490906  | 1.22993    |
| LYRM8    | 0.000862454 | 0.0318289  | -1.66566   | 0.128405    | -1.09808    | 0.0043063   | 1.91739     | 0.0153086   | 2.48678     | 0.0153086   | 2.48678     | 0.25223    | 1.30217    |
| KLHL3    | 0.000862528 | 0.00000000 | 0.00000000 | 0.00000000  | 0.00000000  | 0.00000000  | 1.95233     | 0.00000000  | 1.95233     | 0.0130323   | 1.95233     | 0.139811   | 1.95233    |
| OSBP1    | 0.00086275  | 0.0121174  | 1.79924    | 0.0682216   | -1.42369    | 0.132332    | -1.3828     | 0.0248846   | -2.56156    | 0.00237137  | -2.49798    | 0.82603    | 1.02857    |
| EEF2K    | 0.          |            |            |             |             |             |             |             |             |             |             |            |            |

|             |            |            |          |            |            |            |          |            |          |            |            |            |          |
|-------------|------------|------------|----------|------------|------------|------------|----------|------------|----------|------------|------------|------------|----------|
| RASA3       | 0.00120074 | 0.3752006  | 1.05081  | 0.739383   | -1.00898   | 0.0112285  | 1.24251  | 0.48191    | -1.04145 | 0.0627349  | 1.35563    | 0.0229787  | 1.41183  |
| DEIND3      | 0.00120145 | 0.0052262  | -1.25124 | 0.07474    | -1.23857   | 0.0201223  | -4.10024 | 0.149255   | -1.31224 | 0.334825   | -2.35485   | -0.0000000 | -2.37538 |
| C20nr11     | 0.00120412 | 0.279635   | -1.0388  | 0.169794   | 1.07686    | 0.0275999  | 1.12974  | 0.042696   | 1.11864  | 0.0032435  | 1.17357    | 0.0788379  | 1.04911  |
| C11nr63     | 0.00120499 | 0.827048   | 1.01234  | 0.0372193  | -1.44819   | 0.0468034  | -1.80221 | 0.0139038  | -1.46607 | 0.0202144  | -1.82446   | 0.184711   | -1.24446 |
| N1nr8       | 0.00120755 | 0.004988   | -1.03724 | 0.261226   | -1.02075   | 0.0017772  | 1.16889  | 0.01228    | -1.22247 | 0.00492518 | 1.26819    | 0.0340489  | 1.15888  |
| ACS2        | 0.00121005 | 0.0484191  | -1.47133 | 0.17327    | 1.16416    | 0.107731   | 1.32528  | 0.00463834 | 1.71286  | 0.0164346  | 1.59009    | 0.325111   | 1.16185  |
| LARS        | 0.00121011 | 0.130474   | -1.09914 | 0.177835   | 1.13891    | 0.0473687  | 1.49455  | 0.0178209  | 1.25182  | 0.0252542  | 1.64272    | 0.0126044  | 1.31226  |
| ZC30H124    | 0.00121056 | 0.0299327  | 1.25214  | 0.0260222  | -1.11206   | 0.0013542  | -1.36423 | 0.00234967 | -1.30246 | 0.0173345  | -1.89669   | 0.1311673  | -1.17177 |
| NE01        | 0.00121086 | 0.808731   | 1.0506   | 0.034756   | -1.54764   | 0.0433686  | -6.83842 | 0.00150342 | -1.62594 | 0.038164   | -6.82252   | 0.0676237  | -2.35055 |
| PEA15       | 0.00121707 | 0.17974    | 1.30306  | 0.0413029  | -1.38624   | 0.0237834  | -1.62447 | 0.0422999  | -1.80635 | 0.00988189 | -2.11679   | 0.28932    | -1.17186 |
| NR01        | 0.00122695 | 0.002844   | -1.03724 | 0.177283   | -1.01945   | 0.110435   | -1.23668 | 0.0132542  | -1.22247 | 0.00492518 | -1.26194   | 0.324246   | -1.03242 |
| ARMGEF12    | 0.00122876 | 0.0608744  | -1.35107 | 0.0465761  | -1.20907   | 0.0511663  | -1.95085 | 0.026781   | -2.03683 | 0.0258015  | -3.46751   | 0.125773   | -1.46425 |
| DPVSL2      | 0.00122983 | 0.952752   | -1.00471 | 0.0588751  | -1.80417   | 0.055414   | -2.00831 | 0.0212549  | -1.79672 | 0.0215727  | -1.9989    | 0.0743331  | -1.11315 |
| ARMGAP10    | 0.00123158 | 0.069162   | 1.00308  | 0.0494284  | -1.32002   | 0.0704296  | -1.30302 | 0.00434839 | -1.36104 | 0.00600062 | -1.34352   | 0.326114   | -1.01385 |
| FBXW8       | 0.00124042 | 0.00632701 | -1.41481 | 0.0434742  | -1.15129   | 0.458356   | 1.07872  | 0.011225   | 1.62975  | 0.0170083  | 1.52619    | 0.60222    | -1.06785 |
| PLANC1      | 0.00124052 | 1.25222    | 0.239643 | 1.02009    | 0.00961872 | 1.17628    | -2.78589 | 0.0272897  | -4.46251 | 0.0223987  | -3.05226   | 0.0877826  | -2.3644  |
| UNKNOWN     | 0.00125143 | 0.0214232  | 1.39351  | 0.00596397 | 1.20209    | 0.00981872 | 1.4511   | 0.0911396  | -1.19924 | 0.686997   | 1.04133    | 0.0549019  | 1.20715  |
| MRM1        | 0.00125351 | 0.30237    | -1.10964 | 0.015999   | 1.15419    | 0.0076601  | 1.45541  | 0.0498077  | 1.28074  | 0.0411156  | 1.61499    | 0.0421268  | 1.26999  |
| MPZL        | 0.00126262 | 0.0186778  | -1.51743 | 0.2399759  | 1.19487    | 0.108487   | -1.15954 | 0.0469143  | 1.43695  | 0.00737328 | 1.35542    | 0.401342   | -1.06015 |
| HCC_2039148 | 0.00126341 | 0.00306181 | -1.35107 | 0.146325   | 1.16418    | 0.0785137  | -1.02344 | 0.0186765  | 1.5279   | 0.0036962  | 1.32012    | 0.00508988 | -1.19148 |
| PTK2        | 0.0012669  | 0.0143399  | -1.81875 | 0.509117   | -1.21728   | 0.0257068  | 2.29919  | 0.185636   | 1.49411  | 0.00554016 | 4.18165    | 0.0595478  | 2.79876  |
| SPRE2       | 0.0012685  | 0.0689151  | 1.2205   | 0.052614   | -1.02559   | 0.0126693  | -1.3232  | 0.13642    | -1.25294 | 0.0116281  | -1.16496   | 0.0101593  | -1.28983 |
| REPE4       | 0.00127599 | 0.13379    | 1.13302  | 0.226846   | -1.00023   | 0.0307974  | -1.59331 | -1.05766   | -1.18006 | 0.0155566  | -1.70739   | 0.0639484  | -1.07579 |
| C16nr67     | 0.00128485 | 0.0497273  | -1.21116 | 0.00781918 | 1.23093    | 0.0636366  | 1.23343  | 0.0177588  | 1.49085  | 0.0516051  | 1.49388    | 0.96982    | 1.02023  |
| TRAF6       | 0.00128511 | 0.00128511 | 1.17815  | 0.112923   | -1.02569   | 0.0017725  | -1.07075 | 0.374655   | -1.63346 | 0.0160497  | -1.28151   | 0.0811863  | -1.08427 |
| FANCA       | 0.00128651 | 0.281405   | 1.1806   | 0.0144841  | -1.36411   | 0.0161141  | 1.62692  | 0.0768486  | -1.61046 | 0.0118582  | -1.52074   | 0.16425    | -1.19266 |
| PLAHE       | 0.00128973 | 0.020495   | -1.14545 | 0.204962   | -1.08948   | 0.00784555 | -1.2848  | 0.103392   | -1.24784 | 0.0212472  | -1.47168   | 0.0660236  | -1.17928 |
| TRFKA2      | 0.00129394 | 0.0137739  | 1.46682  | 0.288785   | -1.1049    | 0.104986   | -1.29394 | 0.0302208  | -1.82401 | 0.0095077  | -1.8048    | 0.309326   | -1.1729  |
| PTK7        | 0.00130743 | 0.0052263  | 1.11295  | 0.239956   | 1.23093    | 0.0007725  | 1.60793  | 0.105955   | -1.63346 | 0.0091163  | 1.44413    | 0.0811863  | 1.04686  |
| CMTM1       | 0.00131836 | 0.0142547  | -1.05241 | 0.0595868  | -1.08226   | 0.0216476  | -1.27834 | 0.332956   | -1.02836 | 0.0211593  | -1.21486   | 0.093284   | -1.18118 |
| PC8A        | 0.00131981 | 0.3752006  | 1.11049  | 0.0886813  | -1.31226   | 0.0262073  | -1.80961 | 0.00270138 | -1.45736 | 0.0120738  | -1.78745   | 0.0637658  | -1.2265  |
| UNKNOWN     | 0.00132264 | 0.0376587  | 1.42471  | 0.0265874  | 1.05618    | 0.0069718  | 1.11814  | 0.0385277  | -1.53577 | 0.0412338  | -1.2759    | 0.180178   | 1.04686  |
| DMPK        | 0.00132266 | 0.137842   | 1.15891  | 0.00327226 | -1.14356   | 0.0388892  | -1.37171 | 0.0550426  | -1.32529 | 0.0224807  | -1.58969   | 0.110538   | -1.19951 |
| CNTNAP3     | 0.00132325 | 0.00152131 | 1.65782  | 0.2399759  | -1.08732   | 0.0671935  | 1.40783  | 0.0064067  | -1.80656 | 0.232668   | -1.17177   | 0.0816155  | 1.53444  |
| CNTNAP5     | 0.00132325 | 0.00152131 | 1.65782  | 0.2399759  | -1.08732   | 0.0671935  | 1.40783  | 0.0064067  | -1.80656 | 0.232668   | -1.17177   | 0.0816155  | 1.53444  |
| ZSCAN23     | 0.00133158 | 0.0143943  | -1.94941 | 0.153067   | 1.21039    | 0.562303   | 1.12488  | 0.0097914  | 1.23955  | 0.0436762  | 1.51205    | 0.341305   | -1.07602 |
| UNKNOWN     | 0.00133319 | 0.0386031  | -1.12509 | 0.0364534  | 1.08128    | 0.0638498  | 1.07941  | 0.0305506  | 1.21654  | 0.0471477  | 1.21443    | 0.919477   | -1.00174 |
| SCARNA17    | 0.00133477 | 0.0054687  | 1.42471  | 0.239956   | 1.23093    | 0.0144153  | 1.20883  | 0.0811863  | 1.27754  | 0.0141134  | -1.25498   | 0.0145629  | -1.00329 |
| USP51       | 0.00134484 | 0.0941431  | -1.21813 | 0.423272   | 1.07581    | 0.106703   | 1.26862  | 0.0076129  | 1.31047  | 0.00201902 | 1.54335    | 0.022995   | 1.17923  |
| C16nr80     | 0.00135338 | 0.0061058  | 1.17007  | 0.00733228 | 1.16468    | 0.002224   | -1.01976 | 0.171915   | -1.00463 | 0.0571616  | -1.18319   | 0.0539752  | -1.18789 |
| UNKNOWN     | 0.00135372 | 0.0054487  | 1.65782  | 0.239956   | -1.08732   | 0.0671935  | 1.40783  | 0.0064067  | -1.80656 | 0.232668   | -1.17177   | 0.0816155  | 1.53444  |
| UNKNOWN     | 0.00135372 | 0.0054487  | 1.65782  | 0.239956   | -1.08732   | 0.0671935  | 1.40783  | 0.0064067  | -1.80656 | 0.232668   | -1.17177   | 0.0816155  | 1.53444  |
| MYO15B      | 0.00135442 | 0.0054487  | 1.65782  | 0.239956   | -1.08732   | 0.0671935  | 1.40783  | 0.0064067  | -1.80656 | 0.232668   | -1.17177   | 0.0816155  | 1.53444  |
| DK2         | 0.00135476 | 0.160219   | 1.60929  | 0.028422   | 1.04952    | 0.0485262  | 1.60181  | 0.02908    | 1.67606  | 0.024247   | -1.04196   | 0.0469517  | 1.60787  |
| SEPP1       | 0.00137084 | 0.0480926  | -1.20244 | 0.0383309  | -1.26523   | 0.067379   | -1.78236 | 0.00221529 | -1.58341 | 0.0263367  | -1.7878    | 0.112605   | -1.17601 |
| LRNPNF1     | 0.00137293 | 0.0000189  | 1.72261  | 0.0117768  | 1.8625     | 0.0293243  | 2.10386  | 0.0314763  | 2.28469  | 0.0297399  | 3.5821     | 0.29314    | 1.25043  |
| STOM        | 0.00137596 | 0.0052263  | 1.11295  | 0.239956   | -1.08732   | 0.0671935  | 1.40783  | 0.0064067  | -1.80656 | 0.232668   | -1.17177   | 0.0816155  | 1.53444  |
| MEST        | 0.00137963 | 0.0057128  | -3.37228 | 0.28702    | 1.72999    | 0.14307    | 1.81005  | 0.0358158  | 1.53399  | 0.0100097  | 6.10399    | 0.83344    | 1.04628  |
| UNKNOWN     | 0.00138157 | 0.0083052  | 1.30348  | 0.0284349  | 1.01133    | 0.0931601  | 1.18941  | 0.00722546 | -1.88899 | 0.009599   | -1.14464   | 0.089903   | 1.15632  |
| SPOVE1      | 0.00138201 | 0.0171947  | 1.17524  | 0.0096954  | 1.2511     | 0.0096954  | 1.22145  | 0.19456    | 1.67576  | 0.10332    | 0.00341578 | 1.06564    | 1.06564  |
| STK3        | 0.00138267 | 0.801619   | -1.02938 | 0.0261143  | -1.3899    | 0.0258384  | -2.10413 | 0.158291   | -1.35023 | 0.002516   | -2.04407   | 0.101916   | -1.51387 |
| TYMP        | 0.00138505 | 0.069974   | 1.30768  | 0.562735   | -1.04507   | 0.117404   | -1.12441 | 0.0123833  | -1.36661 | 0.0122516  | -1.47037   | 0.0198889  | -1.07592 |
| EDARAD      | 0.00138816 | 0.0098763  | 1.09873  | 0.286824   | 1.12297    | 0.48986    | -1.31293 | 0.0029738  | -1.60549 | 0.024433   | -4.06549   | 0.069647   | -1.0678  |
| C16nr22     | 0.00139445 | 0.074631   | -1.01865 | 0.0028661  | 1.45645    | 0.0518835  | 1.33643  | 0.0113819  | 1.52334  | 0.0986332  | 1.38135    | 0.212996   | -1.11899 |
| GRAP        | 0.00139683 | 0.173963   | -1.22182 | 0.135905   | 1.2581     | 0.0142422  | 1.76077  | 0.0044539  | 1.5373   | 0.0286666  | 2.15152    | 0.145291   | 1.39954  |
| CBFA2T2     | 0.00139919 | 0.694492   | -1.01012 | 0.0306966  | -1.26099   | 0.0430987  | -1.39065 | 0.0026208  | -1.27376 | 0.0521436  | -1.3219    | 0.194071   | -1.03779 |
| NANOS2      | 0.00140626 | 0.0015875  | 1.29     | 0.0509493  | 1.182      | 0.217668   | 1.08299  | 0.14075    | -1.09138 | 0.0201642  | -1.19115   | 0.0278102  | -1.09142 |
| SV2A        | 0.00141329 | 0.0274877  | 1.47538  | 0.0383476  | -1.43126   | 0.077948   | -1.47277 | 0.0263989  | -1.21166 | 0.00719354 | -2.17289   | 0.890612   | -1.029   |
| SNORD115-17 | 0.00141436 | 0.0593264  | 1.40145  | 0.569732   | 1.01024    | 0.0227443  | 1.37049  | 0.0523294  | -1.38725 | 0.646537   | -1.02259   | 0.0212422  | 1.3566   |
| SNORD115-17 | 0.00141436 | 0.0593264  | 1.40145  | 0.569732   | 1.01024    | 0.0227443  | 1.37049  | 0.0523294  | -1.38725 | 0.646537   | -1.02259   | 0.0212422  | 1.3566   |
| CWH43       | 0.00141731 | 0.0115094  | 2.03157  | 0.029757   | -1.01127   | 0.0349872  | 1.95887  | 0.0474444  | -2.05447 | 0.181904   | -1.03711   | 0.0528498  | 1.89095  |
| MYO1C       | 0.00141785 | 0.0338759  | 1.4657   | 0.0467786  | -1.06866   | 0.279955   | -1.31683 | 0.00411528 | -2.34334 | 0.0380935  | -1.91823   | 0.132464   | 1.22162  |
| COXA        | 0.00142225 | 0.142316   | 1.08282  | 0.178119   | -1.11796   | 0.0370207  | -1.18964 | 0.0143374  | -1.21033 | 0.00119094 | -1.26628   | 0.273874   | -1.04623 |
| SNORA55     | 0.00142488 | 0.00607801 | -1.20298 | 0.018462   | -1.02757   | 0.0170495  | -1.13982 | 0.0129435  | 1.17041  | 0.162899   | 1.05516    | 0.132083   | -1.10923 |
| PELO        | 0.00142679 | 0.0107182  | 2.37058  | 0.0371392  | -1.96375   | 0.0857317  | -3.18988 | 0.00196105 | -4.65233 | 0.0428704  | -6.55233   | 0.170736   | -1.62382 |
| CTD1D5      | 0.00143139 | 0.576816   | -1.06878 | 0.174537   | 1.03792    | 0.0119893  | 1.5016   | 0.00906339 | 1.09893  | 0.0094289  | 1.58986    | 0.0215513  | 1.44673  |
| IGF1R       | 0.00143265 | 0.00274385 | -2.38855 | 0.00119277 | 1.16204    | 0.102018   | 1.96741  | 0.00169528 | 1.52525  | 0.0338947  | 4.69926    | 0.786129   | -1.11832 |
| AKNA        | 0.00143617 | 0.507346   | -1.02803 | 0.33439    | -1.13091   | 0.00183883 | -1.65919 | 0.340247   | -1.10007 | 0.00716269 | -1.06135   | 0.         |          |

# Supplementary Table 3 Genes progressively up and downregulated with T cell differentiation

| Gene Symbol | p-value(TSCM vs. TN) | Fold-Change(TSCM vs. TN) | p-value(TSCM vs. TCM) | Fold-Change(TSCM vs. TCM) | p-value(TSCM vs. TEM) | Fold-Change(TSCM vs. TEM) | p-value(TN vs. TCM) | Fold-Change(TN vs. TCM) | p-value(TN vs. TEM) | Fold-Change(TN vs. TEM) | p-value(TCM vs. TEM) | Fold-Change(TCM vs. TEM) |
|-------------|----------------------|--------------------------|-----------------------|---------------------------|-----------------------|---------------------------|---------------------|-------------------------|---------------------|-------------------------|----------------------|--------------------------|
| IL18R1      | -2.21722             | 1.01462                  | 0.01722               | 1.01462                   | 0.01722               | 1.01462                   | 0.01722             | 1.01462                 | 0.01722             | 1.01462                 | 0.01722              | 1.01462                  |
| NRCAM       | 0.00183407           | -8.8258                  | 0.259817              | 1.92422                   | 0.042739              | 2.54878                   | 0.0140954           | 16.9828                 | 0.0265602           | 22.495                  | 0.384196             | 1.32458                  |
| SULT1B1     | 0.0133697            | -0.00719                 | 0.189641              | 1.83317                   | 0.0590558             | 4.04532                   | 0.00307328          | 9.17902                 | 0.00340866          | 20.2557                 | 0.006361             | 2.02673                  |
| DSG1        | 0.178677             | -1.39142                 | 0.12244               | 1.96372                   | 0.00361216            | 14.3569                   | 0.0140565           | 2.73236                 | 0.0138929           | 19.7665                 | 0.0120318            | 1.73107                  |
| AKS         | 0.0143077            | -4.63937                 | 0.194661              | 1.8169                    | 0.0634649             | 3.85349                   | 0.00166457          | 6.85381                 | 0.0047897           | 18.0244                 | 0.011011             | 2.11101                  |
| SLC16A10    | 0.0577322            | -2.69776                 | 0.0570946             | 2.08886                   | 0.0221397             | 4.68649                   | 0.0119837           | 5.65355                 | 0.0173187           | 12.6443                 | 0.017645             | 2.23446                  |
| UBE2E2      | 0.0363838            | -2.75872                 | 0.0251461             | 2.85764                   | 0.0187504             | 4.51989                   | 0.0094566           | 7.88343                 | 0.00655522          | 12.4666                 | 0.027629             | 1.58137                  |
| NOX1        | 0.0287452            | -2.36587                 | 0.045117              | 2.40451                   | 0.016357              | 4.53938                   | 0.00573983          | 6.58381                 | 0.0141004           | 10.4982                 | 0.0070394            | 1.09738                  |
| LEF1        | 0.0150759            | -1.23562                 | 0.0558569             | 1.25687                   | 0.00825779            | 7.34183                   | 0.00532898          | 1.55204                 | 0.00070699          | 9.0717                  | 0.0170306            | 8.54502                  |
| MAL         | 0.10662              | -1.40875                 | 0.0216165             | 1.63099                   | 0.0195328             | 6.26287                   | 0.00851417          | 2.29765                 | 0.022314            | 8.9199                  | 0.0051989            | 3.83871                  |
| CDCA7L      | 0.130145             | -1.65995                 | 1.84378               | 0.0272027                 | 5.18537               | 0.0261357                 | 3.30659             | 0.013959                | 8.60746             | 0.066716                | 2.81235              | 0.066716                 |
| LRRN1       | 0.0032955            | -2.97153                 | 0.0085330             | 1.81412                   | 0.0243989             | 2.89665                   | 0.00059173          | 4.84848                 | 0.00059173          | 7.78848                 | 0.0035411            | 1.59872                  |
| LASS6       | 0.000116172          | -1.6725                  | 0.116622              | 1.020752                  | 4.6087                | 0.0378274                 | 3.0574              | 0.011228                | 7.78005             | 0.0843697               | 2.52248              | 0.0843697                |
| RBM11       | 0.000510298          | -3.21077                 | 0.246056              | 1.37006                   | 0.039999              | 2.38066                   | 0.0211581           | 4.39894                 | 0.00603877          | 7.64375                 | 0.272525             | 1.73763                  |
| TFEB        | 0.0431436            | -1.75373                 | 0.354641              | 1.60411                   | 0.0155356             | 4.20465                   | 0.0665508           | 2.81318                 | 0.0135155           | 7.37381                 | 0.112897             | 1.57894                  |
| NBEA        | 0.00532862           | -3.62393                 | 0.989431              | 1.0011                    | 0.0101654             | 2.03419                   | 0.00851575          | 3.62792                 | 0.000182885         | 7.37175                 | 0.0241657            | 2.03195                  |
| CNN3        | 0.0282258            | -3.72489                 | 0.043262              | 1.514924                  | 0.043262              | 1.97104                   | 0.00155991          | 5.68889                 | 0.0247773           | 7.3419                  | 0.431702             | 1.29102                  |
| TIMD4       | 0.392733             | -1.1021                  | 0.00293234            | 3.31465                   | 0.0089716             | 6.46749                   | 0.000900144         | 3.85306                 | 0.02142             | 7.1278                  | 0.0262516            | 1.95118                  |
| IRF73       | 0.495482             | -0.495482                | 0.0640598             | 3.25343                   | 0.0173955             | 6.81111                   | 0.0165864           | 3.66831                 | 0.0025695           | 6.9761                  | 0.0142035            | 1.90172                  |
| PTPRK       | 0.00780948           | -3.96543                 | 0.255671              | 1.30618                   | 0.0238035             | 1.70526                   | 0.00866956          | 5.17956                 | 0.00137403          | 6.18497                 | 0.118497             | 1.3086                   |
| MEIS1       | 0.00571298           | -3.72728                 | 0.28702               | 1.72999                   | 0.14307               | 1.81005                   | 0.0358158           | 5.83399                 | 0.0100997           | 6.10399                 | 0.83344              | 1.04628                  |
| LRRN1       | 0.0032955            | -2.97153                 | 0.0085330             | 1.81412                   | 0.0243989             | 2.89665                   | 0.00059173          | 4.84848                 | 0.00059173          | 7.78848                 | 0.0035411            | 1.59872                  |
| PPFP2       | 0.000705009          | -1.78824                 | 0.00974233            | 2.33102                   | 0.00974233            | 3.1754                    | 0.002020262         | 4.16844                 | 0.001917413         | 6.18494                 | 0.0140039            | 1.36224                  |
| C5orf13     | 0.0194105            | -2.28377                 | 0.124438              | 1.55317                   | 0.0206312             | 2.531                     | 0.00215128          | 3.47719                 | 0.0192002           | 5.66333                 | 0.246246             | 1.62957                  |
| KCNQ5       | 0.00172571           | -3.05317                 | 0.0619473             | 1.31551                   | 0.147051              | 1.8071                    | 0.00262647          | 4.01648                 | 0.0147442           | 5.51738                 | 0.325587             | 1.37368                  |
| GJB8        | 0.00270828           | -1.72597                 | 0.012777              | 1.85454                   | 0.0278187             | 3.10529                   | 0.00262196          | 3.39221                 | 0.00593916          | 6.35963                 | 0.0057846            | 1.57894                  |
| APBA2       | 0.0170104            | -1.55431                 | 0.11898               | 1.42467                   | 0.0239041             | 3.26437                   | 0.00945143          | 2.21437                 | 0.021907            | 5.07384                 | 0.123449             | 2.29132                  |
| EPHA2       | 0.13694              | -0.82686                 | 0.0362708             | 2.78694                   | 0.0362708             | 2.78694                   | 0.0846608           | 1.90212                 | 0.00371172          | 4.93794                 | 0.0124686            | 2.61179                  |
| BCL3        | 0.0358647            | -2.22703                 | 0.75678               | 1.04818                   | 0.0486984             | 2.19311                   | 0.012126            | 2.33433                 | 0.000428249         | 4.88412                 | 0.0233955            | 2.0823                   |
| RFR3        | 0.00290073           | -2.20733                 | 0.141598              | 1.81692                   | 0.0145959             | 1.81692                   | 0.0145959           | 1.81692                 | 0.0145959           | 1.81692                 | 0.0145959            | 1.81692                  |
| LGDN        | 0.00237674           | -1.94034                 | 0.0509171             | 1.18355                   | 0.0149549             | 2.4704                    | 0.00601602          | 2.29649                 | 0.0146024           | 4.79342                 | 0.0346647            | 2.08728                  |
| LRRIC16A    | 0.001273             | -1.69086                 | 0.149743              | 1.33124                   | 0.00630459            | 2.8346                    | 0.0286334           | 2.25094                 | 0.0027091           | 4.79292                 | 0.021877             | 2.1293                   |
| NKX2        | 0.0058422            | -1.68422                 | 0.0377986             | 1.60441                   | 0.0134891             | 2.24881                   | 0.00245489          | 4.14134                 | 0.00245489          | 4.7696                  | 0.0139816            | 1.39816                  |
| LOC129293   | 0.00310439           | -1.66745                 | 0.0203792             | 1.47186                   | 0.0248137             | 2.76288                   | 0.00730761          | 2.45426                 | 0.00841668          | 4.40664                 | 0.015818             | 1.877                    |
| FAM153B     | 0.0406805            | -1.42768                 | 0.080125              | 1.33303                   | 0.00635873            | 3.1924                    | 0.0002238           | 1.90314                 | 0.000191428         | 4.55773                 | 0.0014718            | 2.39485                  |
| CHMP7       | 0.00585986           | -1.63599                 | 0.107889              | 1.38985                   | 0.010149              | 2.68467                   | 0.012197            | 2.27231                 | 0.00416048          | 4.32029                 | 0.0088347            | 1.93287                  |
| RRF72       | 0.370173             | -1.19113                 | 0.0192673             | 2.19113                   | 0.0136313             | 2.85914                   | 0.03285279          | 3.83021                 | 0.00059173          | 4.84848                 | 0.0035411            | 1.59872                  |
| FCGBP       | 0.10171              | -1.25196                 | 0.029132              | 2.41024                   | 0.0124966             | 3.45584                   | 0.0007738           | 3.01753                 | 0.0188077           | 4.32659                 | 0.0453866            | 1.43382                  |
| TCF3A       | 0.132447             | -1.24145                 | 0.0485313             | 1.38801                   | 0.0219066             | 1.48335                   | 0.0209511           | 1.69838                 | 0.0318894           | 3.24257                 | 0.0661447            | 2.54629                  |
| CACD1       | 0.016146             | -3.09898                 | 0.013294              | 1.013294                  | 0.125572              | 1.36336                   | 0.0112758           | 3.8857                  | 0.0274758           | 4.21274                 | 0.540285             | 1.08417                  |
| SLC22A17    | 0.116901             | -1.57915                 | 0.0358599             | 1.36991                   | 0.0353926             | 2.66651                   | 0.0657385           | 2.16328                 | 0.0183057           | 4.21081                 | 0.0533111            | 1.94649                  |
| STXBP1      | 0.0427608            | -1.19438                 | 0.040517              | 1.42829                   | 0.0171578             | 3.52381                   | 0.021094            | 1.70592                 | 0.00822834          | 4.20863                 | 0.0429125            | 1.46401                  |
| LRP6        | 0.0244824            | -2.36208                 | 0.223774              | 1.23754                   | 0.0112303             | 1.74594                   | 0.0220148           | 2.92316                 | 0.0146152           | 4.14205                 | 0.189845             | 1.41082                  |
| DEPDC7      | 0.00403787           | -2.36208                 | 0.108697              | 1.25617                   | 0.108697              | 1.25617                   | 0.108697            | 1.25617                 | 0.108697            | 1.25617                 | 0.108697             | 1.25617                  |
| TNFRSD3T1   | 0.000190095          | -2.79014                 | 0.189291              | 1.16442                   | 0.0679496             | 3.27866                   | 0.00419666          | 3.2489                  | 0.00471325          | 3.84162                 | 0.424713             | 1.81244                  |
| VIPR1       | 0.0471522            | -1.18851                 | 0.0430397             | 1.34747                   | 0.0269818             | 3.20509                   | 0.0042975           | 1.60148                 | 0.022487            | 3.80929                 | 0.078342             | 1.37876                  |
| ANKRD35     | 0.0107953            | -2.47323                 | 0.134721              | 1.33455                   | 0.0170171             | 1.33455                   | 0.0231375           | 1.50285                 | 0.0231375           | 1.50285                 | 0.0231375            | 1.50285                  |
| HLA-DQA     | 0.0227487            | -1.82461                 | 1.122048              | 0.00794378                | 1.9514                | 0.0126132                 | 2.29581             | 0.00083481              | 3.84036             | 0.0154175               | 2.63842              | 1.51525                  |
| KCTD12      | 0.00771714           | -1.57605                 | 0.0473797             | 1.14083                   | 0.0473797             | 2.28879                   | 0.00130735          | 1.78801                 | 0.0189101           | 3.60725                 | 0.0488053            | 2.00624                  |
| SEPPORF1    | 0.0600189            | -1.70264                 | 0.117768              | 1.68225                   | 0.0259343             | 2.10386                   | 0.0314763           | 2.86469                 | 0.0297999           | 3.5821                  | 0.20314              | 1.25043                  |
| NPFD        | 0.0686863            | -1.15722                 | 0.0686863             | 1.15722                   | 0.0686863             | 1.15722                   | 0.0686863           | 1.15722                 | 0.0686863           | 1.15722                 | 0.0686863            | 1.15722                  |
| FAM63A      | 0.29462              | -1.42669                 | 0.25635               | 1.28627                   | 0.0255893             | 2.46212                   | 0.0697832           | 1.76378                 | 0.01385             | 3.51268                 | 0.00339523           | 1.99157                  |
| LMO7        | 0.0293286            | -1.52677                 | 1.34762               | 0.0049167                 | 2.28789               | 0.0049167                 | 2.28789             | 0.0049167               | 2.28789             | 0.0049167               | 2.28789              | 0.0049167                |
| GGET2       | 0.0036958            | -1.19189                 | 0.123686              | 1.1986                    | 0.0316718             | 2.92765                   | 0.0301242           | 1.4286                  | 0.0262013           | 3.4967                  | 0.0725257            | 2.44272                  |
| CEP350      | 0.0701724            | -1.60522                 | 0.224967              | 1.41929                   | 0.0244967             | 1.41929                   | 0.0244967           | 1.41929                 | 0.0244967           | 1.41929                 | 0.0244967            | 1.41929                  |
| MYO15B      | 0.0524358            | -1.60522                 | 0.0015941             | 1.63943                   | 0.084575              | 2.10341                   | 0.0120389           | 2.63164                 | 0.0220356           | 3.78447                 | 0.0420927            | 1.28302                  |
| BEND5       | 0.0151537            | -1.36523                 | 0.280312              | 1.24888                   | 0.00210697            | 2.42085                   | 0.0832186           | 1.70501                 | 0.00631391          | 3.37328                 | 0.0170444            | 1.97845                  |
| LRP13       | 0.0273928            | -1.36523                 | 0.280312              | 1.24888                   | 0.00210697            | 2.42085                   | 0.0832186           | 1.70501                 | 0.00631391          | 3.37328                 | 0.0170444            | 1.97845                  |
| FAM153C     | 0.125067             | -1.49591                 | 0.0180384             | 1.35104                   | 0.0312759             | 2.20418                   | 0.0350747           | 2.02103                 | 0.00370561          | 3.29727                 | 0.0443718            | 1.63147                  |
| CTIF48      | 0.0328272            | -1.50435                 | 0.134263              | 1.37629                   | 0.00305636            | 2.19066                   | 0.0474169           | 2.07403                 | 0.0431586           | 3.29553                 | 0.0379465            | 1.59171                  |
| ALPK1       | 0.032003             | -1.63813                 | 0.228989              | 1.31484                   | 0.073019              | 1.89918                   | 0.0158133           | 2.15388                 | 0.0114397           | 3.25854                 | 0.0082434            | 1.51287                  |
| FAM63B      | 0.00176132           | -1.97854                 | 0.029093              | 1.36909                   | 0.131429              | 1.36909                   | 0.131429            | 1.36909                 | 0.131429            | 1.36909                 | 0.131429             | 1.36909                  |
| FCER1G      | 0.880899             | -1.02503                 | 0.0060208             | 2.60439                   | 0.0228718             | 3.11916                   | 0.0225581           | 2.66957                 | 0.0156817           | 3.19722                 | 0.248259             | 1.19765                  |
| TMEM220     | 0.0629253            | -2.09968                 | 0.11197               | 1.52774                   | 0.116272              | 1.54176                   | 0.0136092           | 3.14667                 | 0.00643157          | 3.17554                 | 0.881964             | 1.00917                  |
| CEP350      | 0.0701724            | -1.60522                 | 0.224967              | 1.41929                   | 0.0244967             | 1.41929                   | 0.0244967           | 1.41929                 | 0.0244967           | 1.41929                 | 0.0244967            | 1.41929                  |
| CYP2J2      | 0.00215069           | -2.36208                 | 0.108697              | 1.25617                   | 0.108697              | 1.25617                   | 0.108697            | 1.25617                 | 0.108697            | 1.25617                 | 0.108697             | 1.25617                  |
| FLJ13197    | 0.207355             | -1.19675                 | 0.0223282             | 1.42407                   | 0.0217459             | 2.62338                   | 0.0208046           | 1.70425                 | 0.0341681           | 3.1399                  | 0.0040249            | 1.84217                  |
| GALNT3      | 0.00548412           | -1.54171                 | 0.0261167             | 1.5782                    | 0.0112249             | 2.02853                   | 0.00233334          | 2.43312                 | 0.00643157          | 3.17271                 | 0.180511             | 1.28222                  |
| KIAA0748    | 0.193849             | -1.02503                 | 0.0362869             | 1.02503                   | 0.0362869             | 1.02503                   | 0.0362869           | 1.02503                 | 0.0362869           | 1.02503                 | 0.0362869            | 1.02503                  |
| KIAA0748    | 0.0302412            | -1.1488                  | 0.733517              | 1.0488                    | 0.0176314             | 2.67605                   | 0.0030375           | 1.20486                 | 0.0091870           | 3.07426                 | 0.0074024            | 2.55155                  |
| FAM117B     | 0.0643794            | -1.23605                 | 0.0578279             | 1.51856                   | 0.0010752             | 2.4717                    | 0.0117159           | 1.87701                 | 0.0044003           | 3.05514                 | 0.0607970            | 1.62766                  |
| ANKRD35     | 0.0107953            | -2.47323                 | 0.134721              | 1.33455                   | 0.0170171             | 1.33455                   | 0.0231375           | 1.50285                 | 0.0231375           | 1.50285                 | 0.02                 |                          |



|              |            |            |            |           |            |             |            |            |            |           |            |
|--------------|------------|------------|------------|-----------|------------|-------------|------------|------------|------------|-----------|------------|
| WDR89        | 0.169369   | -1.20398   | 0.0977455  | 1.131379  | 0.0159212  | 1.581778    | 0.0109211  | 1.84623    | 0.0343836  | 1.247462  | 1.16718    |
| RHCH         | 0.00235656 | -1.3093    | 0.193259   | 1.06238   | 0.00517862 | 1.39682     | 0.0153207  | 1.39998    | 0.00086389 | 1.83109   | 0.038517   |
| SFNA4        | 0.0026376  | -1.42437   | 0.0911007  | 1.24669   | 0.0629376  | 1.29427     | 0.023716   | 1.72927    | 0.015827   | 1.72927   | 1.0302     |
| SNDRAS54     | 0.0687866  | -1.36623   | 0.00396664 | 1.25093   | 0.0400296  | 1.36638     | 0.01985    | 1.67245    | 0.0155537  | 1.82579   | 1.09229    |
| UBASH3B      | 0.0868312  | -1.16409   | 0.174246   | 1.14205   | 0.0885522  | 1.56532     | 0.0120338  | 1.32945    | 0.0156444  | 1.82217   | 0.0653826  |
| NA1158       | 0.111752   | -1.07772   | 0.107122   | 1.03722   | 0.0255732  | 1.35144     | 0.051196   | 1.41523    | 0.0361166  | 1.81411   | 1.42474    |
| NMNA3        | 0.2027256  | -1.43261   | 0.101248   | 1.11078   | 0.153291   | 1.24608     | 0.0162652  | 1.59132    | 0.0114057  | 1.78515   | 0.402229   |
| MMP19        | 0.0913408  | -1.18518   | 0.0594405  | 1.33241   | 0.00393427 | 1.4914      | 0.0483323  | 1.57914    | 0.0188668  | 1.70533   | 1.11932    |
| KIA1257      | 0.0294381  | -1.25596   | 0.0383495  | 1.21873   | 0.0361752  | 1.4707      | 0.0311226  | 1.53067    | 0.00638769 | 1.76714   | 0.240542   |
| RPL10A       | 0.0153399  | -1.03589   | 0.150843   | 1.05843   | 0.0504141  | 1.35144     | 0.0468037  | 1.41523    | 0.0468037  | 1.76369   | 0.118028   |
| RBM26        | 0.00769736 | -1.30041   | 0.139485   | 1.14092   | 0.022129   | 1.35421     | 0.0348228  | 1.48367    | 0.0106737  | 1.76103   | 1.58804    |
| PCYOX1L      | 0.012892   | -1.20216   | 0.123506   | 1.15963   | 0.00519449 | 1.46377     | 0.0499918  | 1.38324    | 0.00074671 | 1.75969   | 0.0584707  |
| C20R4        | 0.0738899  | -1.0071923 | 1.12949    | 0.0529916 | 1.41087    | 0.0150796   | 1.41038    | 0.0035952  | 1.75352    | 0.011424  | 1.7342     |
| AARS01       | 0.104662   | -1.26776   | 0.167126   | 1.13908   | 0.0327793  | 1.3908      | 0.00669565 | 1.6983     | 0.00664379 | 1.75929   | 0.327774   |
| TSEN2        | 0.200895   | -1.14974   | 0.0773781  | 1.31149   | 0.151926   | 0.000790391 | 1.50787    | 0.00729916 | 1.74675    | 0.0989404 | 1.15842    |
| THL1         | 0.0426966  | -1.34174   | 0.0165662  | 1.08733   | 0.016278   | 1.29354     | 0.0360088  | 1.45892    | 0.0310331  | 1.7356    | 0.0519977  |
| RBCP5F5      | 0.0125292  | -1.07126   | 0.121474   | 1.03291   | 0.0235299  | 1.32746     | 0.0053274  | 1.58994    | 0.0121424  | 1.7342    | 0.353058   |
| DEYND2       | 0.0273775  | -1.15242   | 0.157676   | 1.09434   | 0.0292906  | 1.48504     | 0.0485958  | 1.26114    | 0.0205602  | 1.71139   | 0.103115   |
| PENB         | 0.0234919  | -1.31998   | 0.0185665  | 1.17451   | 0.0400313  | 1.28432     | 0.0120528  | 1.55033    | 0.00788048 | 1.69528   | 0.122298   |
| USP51        | 0.0245044  | -1.42437   | 0.129304   | 1.02391   | 0.074392   | 1.13391     | 0.0222141  | 1.52577    | 0.0131634  | 1.69898   | 0.078688   |
| MP           | 0.305354   | -1.0984    | 0.130272   | 1.17506   | 0.0109654  | 1.52671     | 0.00148889 | 1.29068    | 0.0230596  | 1.67693   | 0.0657666  |
| UNKNOWN      | 0.842157   | -1.01921   | 0.0584532  | 1.26978   | 0.0149654  | 1.64278     | 0.104644   | 1.29418    | 0.0213694  | 1.65005   | 0.00360298 |
| FAM88B1      | 0.00989719 | -1.41498   | 0.590147   | 1.02794   | 0.111274   | 1.16218     | 0.00468765 | 1.45946    | 0.00814181 | 1.65005   | 0.225694   |
| UBASH3A      | 0.109498   | -1.12195   | 0.0468036  | 1.32553   | 0.00587806 | 1.46714     | 0.0052244  | 1.49054    | 0.0168249  | 1.64605   | 0.104533   |
| LARS         | 0.130474   | -1.09914   | 0.177835   | 1.13891   | 0.0476367  | 1.49455     | 0.0712029  | 1.25182    | 0.0252542  | 1.64272   | 0.0126044  |
| Cyorf1549    | 0.0919349  | -1.32336   | 0.0589027  | 1.10752   | 0.0745266  | 1.23532     | 0.028094   | 1.46564    | 0.00530192 | 1.63478   | 0.094879   |
| FAM88B1      | 0.0673443  | -1.24579   | 0.185971   | 1.07343   | 0.0198501  | 1.30424     | 0.00743961 | 1.33727    | 0.0377369  | 1.62481   | 0.115632   |
| TRPM         | 0.121646   | -1.0746    | 0.121646   | 0.95341   | 0.0178301  | 1.04549     | 0.0096201  | 1.41523    | 0.0096201  | 1.61524   | 0.0046714  |
| IRP1         | 0.30237    | -1.10964   | 0.101569   | 1.15419   | 0.0076601  | 1.45441     | 0.0498077  | 1.28074    | 0.0441156  | 1.61499   | 0.0422168  |
| ZFAND1       | 0.0231679  | -1.24167   | 0.268776   | 1.09472   | 0.0164322  | 1.29932     | 0.0032899  | 1.36928    | 0.0085467  | 1.61333   | 0.0278013  |
| NHE1         | 0.0947238  | -1.14437   | 0.14857    | 1.04857   | 0.0074392  | 1.40168     | 0.0077204  | 1.5144     | 0.0138802  | 1.69405   | 0.055299   |
| TBC1D15      | 0.057616   | -1.05878   | 0.745537   | 1.03792   | 0.0119893  | 1.5016      | 0.0000539  | 1.09893    | 0.0094289  | 1.58986   | 0.021513   |
| NSUN5B       | 0.00610013 | -1.14155   | 0.012658   | 1.2194    | 0.0088202  | 1.38545     | 0.00148922 | 1.39201    | 0.00210726 | 1.58216   | 0.0005594  |
| FAM88B1      | 0.0489036  | -1.24914   | 0.118335   | 1.02531   | 0.0508176  | 1.2562      | 0.0330718  | 1.28076    | 0.00953423 | 1.56917   | 0.062429   |
| RBM43        | 0.011349   | -1.0121    | 0.07114    | 1.00711   | 0.013692   | 1.30866     | 0.0083096  | 1.52066    | 0.0083096  | 1.50339   | 0.00419243 |
| NUP35        | 0.0237776  | -1.27167   | 0.859363   | 1.00776   | 0.0104361  | 1.22162     | 0.0628854  | 1.28153    | 0.0062854  | 1.55349   | 0.0064626  |
| SMA2P        | 0.823356   | -1.00484   | 0.193042   | 1.11956   | 0.0077268  | 1.54449     | 0.115652   | 1.12498    | 0.0128935  | 1.55197   | 0.0403904  |
| NUP51        | 0.991431   | -1.21813   | 0.423273   | 1.07581   | 0.0272454  | 1.26862     | 0.0076129  | 1.31047    | 0.0020192  | 1.54535   | 0.022995   |
| UNKNOWN      | 0.00352483 | -1.28361   | 0.194978   | 1.14717   | 0.018562   | 1.20028     | 0.0396568  | 1.47251    | 0.00265151 | 1.54069   | 0.015478   |
| NSUN5        | 0.001442   | -1.1193    | 0.0103189  | 1.26595   | 0.0289184  | 1.3752      | 0.00514927 | 1.4069     | 0.0138116  | 1.53926   | 0.36831    |
| LOC283398    | 0.0014669  | -1.25225   | 0.29446    | 1.09919   | 0.00910343 | 1.20856     | 0.0370078  | 1.37429    | 0.0035602  | 1.51379   | 0.019577   |
| LOC100288322 | 0.029498   | -1.09348   | 0.029498   | 1.13379   | 0.006976   | 1.36066     | 0.0046389  | 1.31297    | 0.008587   | 1.50339   | 0.013243   |
| ATM          | 0.276683   | -1.0951    | 0.0883084  | 1.14912   | 0.0319752  | 1.3737      | 0.0388903  | 1.25841    | 0.00342113 | 1.50344   | 0.0221452  |
| C16orf67     | 0.0427573  | -1.21116   | 0.00781918 | 1.23093   | 0.0835566  | 1.23433     | 0.0177958  | 1.49085    | 0.0051601  | 1.49338   | 0.96982    |
| FOO3         | 0.0069254  | -1.2047    | 0.279461   | 1.06896   | 0.0072954  | 1.24375     | 0.0224963  | 1.30474    | 0.003475   | 1.63039   | 0.0213443  |
| PTN6         | 0.26123    | -1.03809   | 0.0831646  | 1.2188    | 0.0227377  | 1.41425     | 0.0235193  | 1.26544    | 0.00658999 | 1.46954   | 0.004743   |
| SFMBT2       | 0.0998516  | -1.23258   | 1.08024    | 1.002875  | 0.0128715  | 1.19027     | 0.0003894  | 1.3438     | 0.0247904  | 1.4671    | 0.018339   |
| NOL5         | 0.0037518  | -1.13763   | 0.181946   | 1.08593   | 0.00959494 | 1.28632     | 0.0021483  | 1.23539    | 0.0295957  | 1.46336   | 0.124146   |
| LAS1         | 0.129538   | -1.02507   | 0.034763   | 1.13624   | 0.0136241  | 1.36248     | 0.0125481  | 1.42548    | 0.0125481  | 1.42548   | 0.017846   |
| RPS3A        | 0.0989262  | -1.19908   | 0.526035   | 1.0042618 | 0.020865   | 1.20985     | 0.0030389  | 1.23934    | 0.0189163  | 1.44928   | 0.065458   |
| JAGN1        | 0.29211    | -1.07099   | 0.528335   | 0.019969  | 0.019969   | 1.38171     | 0.1017919  | 1.18172    | 0.00662274 | 1.44768   | 0.023799   |
| TMPO         | 0.0671152  | -1.10663   | 0.150183   | 1.07398   | 0.0260752  | 1.30511     | 0.0261099  | 1.13424    | 0.0076658  | 1.44296   | 0.0208889  |
| AKR1B1       | 0.11633    | -1.02526   | 0.089163   | 1.07521   | 0.0076371  | 1.28448     | 0.00666939 | 1.41344    | 0.00666939 | 1.41344   | 0.110325   |
| PNP1L1       | 0.166537   | -1.13797   | 0.303685   | 1.10586   | 0.0394525  | 1.25794     | 0.00390757 | 1.25844    | 0.0064102  | 1.43151   | 0.0629968  |
| SEH1L        | 0.119351   | -1.09351   | 0.320875   | 1.03605   | 0.0156776  | 1.19215     | 0.00625119 | 1.25844    | 0.00401847 | 1.42295   | 0.00156432 |
| TBC1D3       | 0.123885   | -1.078     | 0.0196479  | 1.03742   | 0.0037428  | 1.31299     | 0.0029428  | 1.41441    | 0.0029428  | 1.41441   | 0.0029428  |
| ACBD4        | 0.0370875  | -1.23568   | 0.70104    | 1.01882   | 0.00449563 | 1.12866     | 0.031949   | 1.25689    | 0.0198315  | 1.39241   | 0.125309   |
| EEF2K        | 0.214055   | -1.03493   | 0.0434838  | 1.33103   | 0.0114705  | 1.33999     | 0.0560952  | 1.37753    | 0.0143598  | 1.39679   | 0.0505897  |
| FLJ39653     | 0.0112951  | -1.22136   | 0.024004   | 1.05294   | 0.0404187  | 1.12869     | 0.00278489 | 1.28603    | 0.00144665 | 1.37963   | 0.0547421  |
| MTOR         | 0.0191714  | -1.09283   | 0.0695744  | 1.13379   | 0.013692   | 1.48217     | 0.0181027  | 1.32455    | 0.008587   | 1.50339   | 0.00419243 |
| GPM3         | 0.073152   | -1.07706   | 0.0779813  | 1.12392   | 0.0284745  | 1.24811     | 0.0067499  | 1.21053    | 0.0067499  | 1.34429   | 0.194675   |
| UNKNOWN      | 0.0884604  | -1.05458   | 1.79E-05   | 1.13406   | 0.0128308  | 1.25041     | 0.00085322 | 1.19596    | 0.0227623  | 1.31866   | 0.0632959  |
| PNP8         | 0.0094998  | -1.58951   | 0.0050806  | 1.07581   | 0.00269703 | 1.30866     | 0.00269703 | 1.30866    | 0.00269703 | 1.30866   | 0.00269703 |
| FOCHI        | 0.0098795  | -1.13628   | 0.13628    | 0.93569   | 0.0424773  | 1.15332     | 0.0395627  | 1.17716    | 0.00709514 | 1.31049   | 0.00959702 |
| NUMA1        | 0.0696498  | -1.07559   | 0.0031959  | 1.12604   | 0.0119589  | 1.2149      | 0.0252211  | 1.21116    | 0.0090005  | 1.30674   | 0.17891    |
| ANAPC13      | 0.120966   | -1.06389   | 0.029864   | 1.06302   | 0.00392157 | 1.21714     | 0.0689376  | 1.12753    | 0.0101065  | 1.29496   | 0.0120388  |
| PNP8         | 0.0094998  | -1.58951   | 0.0050806  | 1.07581   | 0.00269703 | 1.30866     | 0.00269703 | 1.30866    | 0.00269703 | 1.30866   | 0.00269703 |
| UNKNOWN      | 0.0530336  | -1.12052   | 0.0791007  | 1.07351   | 0.0168467  | 1.14666     | 0.0317992  | 1.20289    | 0.00138552 | 1.28486   | 0.139425   |
| ZNF121       | 0.0150399  | -1.12125   | 0.644354   | 1.01899   | 0.0418046  | 1.1338      | 0.0365436  | 1.14254    | 0.013201   | 1.27217   | 0.0115195  |
| MEK1         | 0.807113   | -1.00713   | 0.18086    | 0.0413271 | 0.0322871  | 1.2607      | 0.0282172  | 1.26062    | 0.0282172  | 1.26062   | 0.0282172  |
| EIF2B4       | 0.00132386 | -1.11981   | 0.21526    | 1.02886   | 0.130781   | 1.08065     | 0.00749911 | 1.15213    | 0.0198146  | 1.21012   | 0.101844   |
| NDUFS2       | 0.102443   | -1.03428   | 0.0172491  | 1.14562   | 0.0208366  | 1.15797     | 0.0262413  | 1.1849     | 0.0317213  | 1.19767   | 0.630508   |
| C20orf11     | 0.279635   | -1.0358    | 0.169794   | 1.07686   | 0.0279599  | 1.12974     | 0.0142686  | 1.11864    | 0.00324255 | 1.17357   | 0.0788379  |
| LOC100288322 | 0.00128645 | -1.02647   | 0.52329    | 1.01833   | 0.020382   | 1.10433     | 0.0125481  | 1.10433    | 0.0125481  | 1.10433   | 0.0125481  |
| MTCH2        | 0.0128645  | -1.11038   | 0.664078   | 1.001532  | 0.203082   | -1.0413     | 0.0326265  | -1.12739   | 0.0195891  | -1.15624  | 0.114695   |
| UNKNOWN      | 0.199411   | -1.02229   | 0.131298   | 0.0668815 | -1.17697   | 0.0508035   | -1.08167   | 0.0170789  | -1.20392   | 0.0046421 | -1.11302   |
| RAB6C        | 0.011157   | -1.1632    | 0.228175   | -1.03413  | 0.117747   | -1.10375    | 0.0112812  | -1.15442   | 0.0230477  | -1.23214  | 0.0674434  |
| KIF4D        | 0.0887122  | -1.08812   | 0.088502   | 0.025917  | 0.025917   | -1.14033    | 0.025917   | -1.12111   | 0.025917   | -1.21049  | -1.01169   |
| SETD2        | 0.0683449  | -1.07632   | 0.00788884 | -1.14613  | 0.0273652  | -1.14781    | 0.0102479  | -1.23359   | 0.0270477  | -1.25191  | 0.935755   |
| UNKNOWN      | 0.0284497  | -1.18941   | 0.634548   | 0.01965   | 0.221426   | -1.00368    | 0.00920888 | -1.21279   | 0.0032135  | -1        |            |

|              |             |           |            |           |             |           |             |            |             |           |            |           |
|--------------|-------------|-----------|------------|-----------|-------------|-----------|-------------|------------|-------------|-----------|------------|-----------|
| MEF2D        | 0.0547906   | 1.27143   | 0.0439317  | -1.1686   | 0.0285288   | -1.39695  | 0.00602381  | -1.48566   | 0.0169585   | -1.77611  | 0.0067286  | -1.1955   |
| ABL1         | 0.18666     | 1.02624   | 0.48625    | -1.05172  | 0.0115689   | -1.61152  | 0.0344437   | -1.15967   | 0.0271034   | -1.77893  | 0.0596578  | -1.53226  |
| TMEM30A      | 0.369041    | 0.107442  | 0.0163949  | -1.04299  | 0.0143249   | -1.44563  | 0.0072848   | -1.49029   | 0.0072848   | -1.78445  | 0.0067286  | -1.23133  |
| PCBP4        | 0.375289    | 1.11049   | 0.0666813  | -1.31236  | 0.062673    | -1.60961  | 0.00270138  | -1.48567   | 0.0123739   | -1.78445  | 0.0937658  | -1.2265   |
| PLCD1        | 0.228811    | 1.16518   | 0.105434   | -1.2003   | 0.0371205   | -1.55309  | 0.00537742  | -1.35736   | 0.0151729   | -1.79445  | 0.0434877  | -1.29391  |
| CHST12       | 0.1404778   | 1.03442   | 0.0044204  | -1.03442  | 0.0044204   | -1.03442  | 0.0044204   | -1.03442   | 0.0044204   | -1.03442  | 0.0044204  | -1.03442  |
| RASGRP1      | 0.00692484  | 1.34493   | 0.0055017  | -1.23954  | 0.0055017   | -1.34003  | 0.000788619 | -1.66709   | 0.0214035   | -1.80225  | 0.449247   | -1.08108  |
| UNKNOWN      | 0.0300463   | 1.43458   | 0.195179   | -1.1703   | 0.172892    | -1.25728  | 0.161877    | -1.6789    | 0.00617304  | -1.80225  | 0.473258   | -1.07432  |
| C1orf58      | 0.0541211   | 1.20101   | 0.0031835  | -1.23113  | 0.0336898   | -1.51119  | 0.00174346  | -1.47786   | 0.0194549   | -1.81495  | 0.100193   | -1.22748  |
| C1orf63      | 0.027048    | 1.04491   | 0.0469304  | -1.44919  | 0.0469304   | -1.44919  | 0.0469304   | -1.44919   | 0.0469304   | -1.44919  | 0.0469304  | -1.44919  |
| C6orf129     | 0.1708      | 1.25962   | 0.1501     | -1.34259  | 0.055032    | -1.45066  | 0.0140629   | -1.69114   | 0.00683104  | -1.82727  | 0.342074   | -1.08005  |
| FHOD1        | 0.029156    | 1.31533   | 0.164558   | -1.16104  | 0.0203959   | -1.38925  | 0.0355083   | -1.52715   | 0.00713606  | -1.82733  | 0.167129   | -1.19656  |
| DKFZB434F142 | 0.197926    | 0.39759   | 0.101255   | -1.04259  | 0.0235999   | -1.03779  | 0.156307    | -1.09779   | 0.0135228   | -1.62981  | 0.011979   | -1.66696  |
| PKC3CG       | 0.0311931   | 0.05919   | 0.142529   | -1.06815  | 0.142529    | -1.06815  | 0.0679118   | -1.17201   | 0.012462    | -1.839    | 0.0527732  | -1.5691   |
| ITPR3        | 0.0488991   | 1.32188   | 0.00479873 | -1.05391  | 0.00479873  | -1.39212  | 0.0214746   | -1.39314   | 0.00527489  | -1.84022  | 0.0423881  | -1.32092  |
| BTG3         | 0.0762927   | 1.23261   | 0.00993174 | -1.20075  | 0.0131925   | -1.49325  | 0.0182573   | -1.48006   | 0.024093    | -1.8406   | 0.0374539  | -1.2436   |
| C4orf9       | 0.226257    | 1.1125    | 0.069308   | -1.34689  | 0.069308    | -1.25848  | 0.0052042   | -1.65499   | 0.0052042   | -1.85291  | 0.0176121  | -1.2382   |
| CNNM3        | 0.115885    | 1.16355   | 0.00130444 | -1.35921  | 0.0142581   | -1.66446  | 0.00544135  | -1.51735   | 0.0110087   | -1.85811  | 0.0577696  | -1.22457  |
| IFIH1        | 0.0044787   | 1.55262   | 0.106723   | -1.03626  | 0.230472    | -1.19684  | 0.00125638  | -1.58084   | 0.0156721   | -1.85824  | 0.297146   | -1.12563  |
| MYO4         | 0.0142755   | 1.21213   | 0.149463   | -1.22308  | 0.0323424   | -1.49325  | 0.0411726   | -1.46253   | 0.0167743   | -1.8626   | 0.011979   | -1.25637  |
| CDK2AP1      | 0.0251922   | 1.33112   | 0.254641   | -1.15028  | 0.0129739   | -1.41296  | 0.0586303   | -1.53117   | 0.0179154   | -1.88083  | 0.1178     | -1.22836  |
| REL          | 0.0412599   | 1.44971   | 0.270209   | -1.05442  | 0.0276925   | -1.29986  | 0.0320058   | -1.52886   | 0.0353679   | -1.88441  | 0.0804979  | -1.23277  |
| BCL2L1       | 0.206885    | 1.16956   | 0.0198763  | -1.10216  | 0.0116371   | -1.61141  | 0.0766558   | -1.28903   | 0.0311139   | -1.88484  | 0.027491   | -1.46205  |
| MVD          | 0.0532717   | 1.51055   | 0.168338   | -1.15524  | 0.0232314   | -1.25848  | 0.00791556  | -1.74481   | 0.0191582   | -1.90075  | 0.404951   | -1.09337  |
| TTC39C       | 0.0265933   | 1.41477   | 0.00088218 | -1.31713  | 0.115795    | -1.34546  | 0.0110305   | -1.86344   | 0.00746175  | -1.90352  | 0.874559   | -1.02151  |
| 010173739    | 1.46982     | 0.288785  | -1.1049    | 0.104986  | -1.29594    | 0.0392208 | -1.62401    | 0.0059077  | -1.9048     | 0.303326  | -1.1729    |           |
| FLKHA2       | 0.325273    | 1.12428   | 0.493814   | -1.097    | 0.0220093   | -1.70477  | 0.0194193   | -1.23344   | 0.00071361  | -1.91664  | 0.00621422 | -1.55403  |
| SL2          | 0.018452    | 1.01649   | 0.018452   | -1.16954  | 0.0044204   | -1.16954  | 0.0044204   | -1.16954   | 0.0044204   | -1.16954  | 0.0044204  | -1.16954  |
| EMCA         | 0.261405    | 1.1806    | 0.0144881  | -1.36411  | 0.0161141   | -1.62892  | 0.00768486  | -1.61046   | 0.0118582   | -1.92074  | 0.16425    | -1.19266  |
| CDCA4        | 0.3992137   | 1.36048   | 0.0172784  | -1.18228  | 0.0540966   | -1.40298  | 0.0194111   | -1.63211   | 0.00705036  | -1.93678  | 0.129121   | -1.18667  |
| FLC2         | 0.0542954   | 1.41298   | 0.133867   | -1.3095   | 0.0213624   | -1.73787  | 0.0389203   | -1.42537   | 0.00464124  | -1.85029  | 0.3414945  | -1.04824  |
| MBSD10       | 0.026267    | 1.50706   | 0.557483   | -1.07613  | 0.101058    | -1.29383  | 0.00597339  | -1.62179   | 0.0052701   | -1.94988  | 0.11642    | -1.2023   |
| TBCD         | 0.0171678   | 1.55119   | 0.100909   | -1.173756 | 0.100909    | -1.27032  | 0.0215127   | -1.88827   | 0.00889054  | -1.9714   | 0.780315   | -1.03852  |
| CAPN2        | 0.0897151   | 1.25252   | 0.0788447  | -1.21181  | 0.0556263   | -1.57567  | 0.0171611   | -1.52407   | 0.0120135   | -1.97356  | 0.0497883  | -1.29492  |
| ICAP1        | 0.00162312  | 1.21213   | 0.0146387  | -1.2942   | 0.0139213   | -1.59394  | 0.0315995   | -1.63781   | 0.00561225  | -1.91671  | 0.0303676  | -1.22628  |
| CHST11       | 0.0036439   | 1.38419   | 0.0286141  | -1.28324  | 0.0146163   | -1.4403   | 0.00345969  | -1.74857   | 0.00290503  | -1.98194  | 0.0011747  | -1.14016  |
| PIK3R1       | 0.0062689   | 1.70051   | 0.0254635  | -1.16076  | 0.181316    | -1.17487  | 0.00105102  | -1.97388   | 0.0185155   | -1.99788  | 0.914655   | -1.02116  |
| 010162312    | 1.21213     | 0.0191582 | -1.2942    | 0.0139213 | -1.59394    | 0.0315995 | -1.63781    | 0.00561225 | -1.91671    | 0.0303676 | -1.22628   |           |
| KIR2DL3      | 0.0344136   | 1.384     | 0.0788495  | -1.19448  | 0.0788495   | -1.45443  | 0.0109757   | -1.55322   | 0.0117867   | -1.90293  | 0.162876   | -1.25997  |
| DLG3         | 0.0246884   | 1.17657   | 0.17277    | -1.26685  | 0.0463019   | -1.71456  | 0.0493997   | -1.49054   | 0.0181093   | -1.9073   | 0.0080612  | -1.3734   |
| MXD3         | 0.0961032   | 1.17643   | 0.0193864  | -1.16811  | 0.00386963  | -1.16811  | 0.0152805   | -1.3742    | 0.00462567  | -1.93363  | 0.0162773  | -1.4596   |
| RALGAP3      | 0.0542987   | 1.29706   | 0.0567673  | -1.29706  | 0.0567673   | -1.29706  | 0.0567673   | -1.29706   | 0.0567673   | -1.29706  | 0.0567673  | -1.29706  |
| S1PR5        | 0.0890555   | 1.13316   | 0.0116667  | -1.02231  | 0.0204438   | -1.80624  | 0.0671071   | -1.5912    | 0.00785194  | -1.96676  | 0.0316258  | -1.76579  |
| WSB2         | 0.00812129  | 1.30145   | 0.0272323  | -1.38804  | 0.0630407   | -1.5904   | 0.0112685   | -1.78044   | 0.0214745   | -1.96833  | 0.231719   | -1.16254  |
| CD3          | 0.332257    | 1.21213   | 0.122951   | -1.02951  | 0.00919255  | -1.20295  | 0.00919255  | -1.20295   | 0.00919255  | -1.20295  | 0.00919255 | -1.20295  |
| TIPARP       | 0.0295737   | 1.66499   | 0.0415944  | -1.11666  | 0.137043    | -1.24355  | 0.0148815   | -1.85023   | 0.0179111   | -1.90705  | 0.255251   | -1.11364  |
| SP140        | 0.00519846  | 1.64008   | 0.352015   | -1.1454   | 0.0921795   | -1.2686   | 0.031679    | -1.87856   | 0.0155737   | -1.9086   | 0.157878   | -1.10755  |
| CD151        | 0.0570445   | 1.18701   | 0.196387   | -1.12343  | 0.0140896   | -1.75447  | 0.00505127  | -1.33533   | 0.0209823   | -1.92828  | 0.0679746  | -1.56171  |
| 00028035     | 1.34748     | 0.324002  | -1.18716   | 0.038209  | -1.34748    | 0.324002  | -1.18716    | 0.038209   | -1.34748    | 0.324002  | -1.18716   | 0.038209  |
| KRTPA-2      | 0.0992895   | 1.30763   | 0.0356102  | -1.42248  | 0.0356102   | -1.60471  | 0.0319261   | -1.86009   | 0.0057819   | -1.90937  | 0.179637   | -1.1281   |
| NF1          | 0.0647327   | 1.18928   | 0.0124893  | -1.31741  | 0.0249249   | -1.76785  | 0.00567871  | -1.65675   | 0.0257146   | -1.91047  | 0.28934    | -1.34191  |
| PEA15        | 0.17974     | 1.30306   | 0.0413029  | -1.38624  | 0.0237834   | -1.62447  | 0.0422999   | -1.80635   | 0.0068981   | -1.92742  | 0.13782    | -1.17196  |
| PARP8        | 0.143251    | 1.24511   | 0.26311    | -1.07639  | 0.0298389   | -1.17076  | 0.019165    | -1.30942   | 0.019165    | -1.79843  | 0.019165   | -1.52418  |
| IRF16        | 0.00539847  | 1.48109   | 0.085839   | -1.19568  | 0.00376137  | -1.43976  | 0.0023095   | -1.77091   | 0.00189272  | -1.93242  | 0.0903178  | -1.20414  |
| UEVLD        | 0.051844    | 1.18414   | 0.00669076 | -1.15707  | 0.00669076  | -1.80231  | 0.0734215   | -1.37013   | 0.00017843  | -1.93418  | 0.0345749  | -1.56785  |
| FAH4         | 0.0745933   | 1.41077   | 0.0512237  | -1.14528  | 0.020273    | -1.52138  | 0.00364202  | -1.44425   | 0.00364202  | -1.46128  | 0.00364202 | -1.46128  |
| CACNB1       | 0.00735027  | 1.56098   | 0.0135597  | -1.07902  | 0.0282874   | -1.37941  | 0.0058086   | -1.68432   | 0.0106795   | -1.95234  | 0.0347732  | -1.2784   |
| TMX4         | 0.0974029   | 1.09575   | 0.0064865  | -1.21361  | 0.0064865   | -1.97239  | 0.0230011   | -1.33202   | 0.0121132   | -1.91626  | 0.0201096  | -1.62522  |
| SLC6A6       | 0.000780284 | 1.1857    | 0.0865415  | -1.29033  | 0.0067854   | -1.82689  | 0.0334587   | -1.52995   | 0.00478215  | -1.96185  | 0.0688227  | -1.41583  |
| 0544299      | 1.29706     | 0.1612212 | -1.29706   | 0.1612212 | -1.29706    | 0.1612212 | -1.29706    | 0.1612212  | -1.29706    | 0.1612212 | -1.29706   | 0.1612212 |
| SV2A         | 0.027487    | 1.47538   | 0.0383476  | -1.43126  | 0.077948    | -1.47277  | 0.0239898   | -1.21166   | 0.00719354  | -1.96185  | 0.890612   | -1.029    |
| LLGL2        | 0.0480926   | 1.22241   | 0.0363039  | -1.29532  | 0.0767379   | -1.78236  | 0.00221529  | -1.58341   | 0.0263367   | -1.97878  | 0.112905   | -1.37601  |
| 06041721     | 1.09181     | 0.0171611 | -1.09181   | 0.0171611 | -1.09181    | 0.0171611 | -1.09181    | 0.0171611  | -1.09181    | 0.0171611 | -1.09181   | 0.0171611 |
| PPP2R5C      | 0.0591914   | 1.74155   | 0.00692624 | -1.19929  | 0.00692624  | -1.26555  | 0.0357263   | -1.07576   | 0.0280228   | -1.94022  | 0.057485   | -1.06179  |
| CD99         | 0.0165087   | 1.74156   | 0.108097   | -1.07472  | 0.108097    | -1.26798  | 0.0176969   | -1.8717    | 0.0369249   | -1.92267  | 0.244654   | -1.17982  |
| RAPGEF1      | 0.0440179   | 1.70706   | 0.472712   | -1.09109  | 0.121068    | -1.34006  | 0.00129412  | -1.86256   | 0.0308707   | -1.92821  | 0.286399   | -1.19518  |
| PRKAR1B      | 0.161738    | 1.03822   | 0.0380563  | -1.02961  | 0.02961     | -1.49864  | 0.02961     | -1.49864   | 0.02961     | -1.49864  | 0.02961    | -1.49864  |
| OSBP1L       | 0.256352    | 1.17322   | 0.192247   | -1.16298  | 0.00158924  | -1.8981   | 0.064702    | -1.3892    | 0.00499696  | -1.92331  | 0.0156358  | -1.63037  |
| FOXP4        | 0.115429    | 1.40055   | 0.0042269  | -1.19055  | 0.000312312 | -1.60758  | 0.0007799   | -1.66743   | 0.0237646   | -1.92515  | 0.130647   | -1.35028  |
| CD2          | 0.72183     | 1.03864   | 0.0380563  | -1.02961  | 0.02961     | -1.49864  | 0.02961     | -1.49864   | 0.02961     | -1.49864  | 0.02961    | -1.49864  |
| TBC1D2B      | 0.271235    | 1.0663    | 0.0728759  | -1.3252   | 0.0085593   | -1.20707  | 0.114332    | -1.4665    | 0.0240244   | -1.92964  | 0.00039303 | -1.56812  |
| ST7          | 0.316896    | 1.22092   | 0.0075508  | -1.35155  | 0.0408201   | -1.89489  | 0.0613143   | -1.65013   | 0.000897951 | -1.93151  | 0.0098616  | -1.40202  |
| CD99         | 0.0101497   | 1.95959   | 0.963445   | -1.00414  | 0.0853132   | -1.18097  | 0.0055012   | -1.96771   | 0.0168847   | -1.94241  | 0.248979   | -1.17609  |
| ACT1         | 0.255939    | 1.11521   | 0.0386819  | -1.11521  | 0.0386819   | -1.11521  | 0.0386819   | -1.11521</ |             |           |            |           |

|          |             |         |             |          |            |           |             |           |            |          |            |
|----------|-------------|---------|-------------|----------|------------|-----------|-------------|-----------|------------|----------|------------|
| SRGN     | 0.0248758   | 2.25243 | 0.123094    | -1.51769 | 0.110011   | 0.0202424 | -3.41849    | 0.0363116 | -3.81159   | 0.626203 | -1.05646   |
| HLA-DRB5 | 0.0640004   | 1.34829 | 0.0663354   | -2.24616 | 0.0139631  | -1.70036  | 0.0576378   | -3.02848  | 0.0180474  | -3.64087 | -1.20221   |
| BGALNT5  | 0.264968    | 1.23818 | 0.163668    | -1.11777 | 0.0228984  | -1.45861  | 0.0228984   | -1.45861  | 0.0228984  | -1.45861 | -2.81855   |
| WIP1     | 0.0265406   | 1.54837 | 0.0684513   | -1.31069 | 0.0125226  | -2.37285  | 0.0125226   | -2.02444  | 0.00330716 | -3.67373 | -1.81022   |
| PTRFR1   | 0.0229142   | 2.38468 | 0.00282552  | -1.28106 | 0.0262266  | -1.55175  | 0.0137748   | -3.0549   | 0.0144888  | -3.70043 | -0.0856495 |
| SLFN11   | 0.00891487  | 1.35781 | 0.00378664  | -2.61709 | -1.341094  | -2.72891  | 0.00342128  | -3.55351  | 0.012338   | -3.70535 | -1.02473   |
| DUSP2    | 0.00432637  | 1.76475 | 0.105221    | -1.79914 | 0.0241188  | -2.13124  | 0.0263598   | -3.17504  | 0.00572672 | -3.76111 | 0.203041   |
| UNKNOWNN | 0.282598    | 1.29783 | 0.1032068   | -1.70811 | 0.0132068  | -2.89842  | 0.18418     | -1.37465  | 0.00369006 | -1.81418 | -0.104037  |
| ANKA5    | 0.0487483   | 1.47546 | 0.154798    | -1.62814 | 0.017857   | -2.55025  | 0.0522389   | -2.40225  | 0.00942268 | -3.76278 | 0.0388499  |
| ARNAK    | 0.00403359  | 2.09202 | 0.0043359   | -1.38318 | 0.0374452  | -1.79878  | 0.000751918 | -2.85862  | 0.00751324 | -3.78788 | -1.31808   |
| NEO1     | 0.580734    | 1.05056 | 0.0347567   | -1.54764 | 0.0433686  | -3.63842  | 0.00150342  | -1.62524  | 0.0381674  | -3.67627 | -2.35095   |
| CLC1     | 0.00333307  | 1.87803 | 0.193557    | -1.42148 | 0.0225666  | -2.04491  | 0.0221552   | -2.66959  | 0.00300364 | -3.84041 | 0.0665079  |
| EFP24    | 0.0545947   | 1.3672  | 0.0054622   | -1.73584 | 0.00422292 | -2.35673  | 0.0511464   | -2.37324  | 0.0118463  | -3.83939 | -1.63421   |
| MAP3K5   | 0.0223254   | 2.21064 | 0.209135    | -1.15874 | 0.00591493 | -1.77036  | 0.00180736  | -2.56157  | 0.00911751 | -3.91363 | -1.52783   |
| IL2RB    | 0.00672448  | 2.80796 | 0.150478    | -1.24565 | 0.328279   | -1.39929  | 0.00348626  | -3.49773  | 0.0160561  | -3.92916 | 0.652349   |
| PLEKHG1  | 0.00162683  | 1.35011 | 0.0279663   | -1.70488 | 0.0253297  | -2.97807  | 0.0127015   | -2.30177  | 0.0145521  | -4.02071 | 0.167698   |
| MYO6     | 0.102311    | 1.45378 | 0.0036251   | -1.62593 | 0.0227769  | -2.76857  | 0.0225162   | -2.36368  | 0.0281366  | -4.0249  | 0.050186   |
| GTDC1    | 0.04092     | 1.50131 | 0.0280519   | -1.26017 | 0.0437522  | -2.68147  | 0.0290615   | -1.89191  | 0.0229542  | -4.02571 | 0.0946053  |
| EDARADD  | 0.00997853  | 3.09673 | 0.298824    | -1.2297  | 0.489998   | -1.31283  | 0.00297583  | -3.80808  | 0.024433   | -4.05459 | 0.806947   |
| GALM     | 0.00580333  | 1.72922 | 0.00507968  | -1.87951 | 0.0323659  | -2.43578  | 0.00504967  | -3.25006  | 0.0152853  | -4.21195 | 0.232432   |
| TARP     | 0.515606    | 1.17291 | 0.590849    | -1.07804 | 0.0152693  | -3.84367  | 0.324488    | -1.26444  | 0.0019062  | -4.27368 | 0.0174583  |
| ADAM8    | 0.000465304 | 1.7226  | 0.00365572  | -1.55274 | 0.0031766  | -2.48769  | 0.0015303   | -2.67476  | 0.00113831 | -4.2853  | 0.00411263 |
| CLC1     | 0.00206263  | 2.07474 | 0.125021    | -1.44159 | 0.0100777  | -2.0698   | 0.0123899   | -2.99903  | 0.00301585 | -4.29431 | 0.0694171  |
| MSME     | 0.220383    | 1.24107 | 0.0185945   | -2.16703 | 0.0192279  | -3.4606   | 0.0148592   | -2.68844  | 0.0035316  | -4.2946  | -1.59894   |
| HNRPLL   | 0.0320315   | 1.37181 | 0.00627977  | -2.91008 | 0.0311274  | -3.13523  | 0.00431571  | -3.92006  | 0.0299005  | -4.30093 | 0.743576   |
| SYT11    | 0.010633    | 2.73661 | 0.039266    | -1.57762 | 0.101026   | -1.57933  | 0.0167324   | -4.31462  | 0.0257945  | -4.32201 | 0.992214   |
| ATP2B4   | 0.0406576   | 1.64383 | 0.00275594  | -1.81882 | 0.0512537  | -2.63426  | 0.00974668  | -2.98826  | 0.0232052  | -4.32028 | 0.201298   |
| AKSL2    | 0.0892481   | 2.1487  | 0.0227819   | -1.421   | 0.047407   | -1.421    | 0.047407    | -1.421    | 0.0251477  | -4.32028 | -1.48834   |
| MATK     | 0.0241342   | 1.77404 | 0.409541    | -1.19423 | 0.0016301  | -2.46051  | 0.0365457   | -2.1186   | 0.00205422 | -4.36504 | 0.0344578  |
| ARHGAP18 | 0.012783    | 1.75225 | 0.152726    | -1.34711 | 0.0205522  | -2.52609  | 0.0047281   | -2.30389  | 0.0143411  | -4.42634 | 0.10009    |
| FNIN1L   | 0.0248828   | 1.69363 | 0.098364    | -1.46707 | 0.00235658 | -2.75956  | 0.031792    | -2.35997  | 0.00265414 | -4.43911 | 0.0356227  |
| SPATS2L  | 0.26145     | 1.16742 | 0.150608    | -1.58259 | 0.0413277  | -3.81182  | 0.0294893   | -1.84754  | 0.0194046  | -4.44988 | 0.052458   |
| RAZ7B    | 0.0750696   | 1.49817 | 0.00881874  | -2.22421 | 0.00881874 | -2.99166  | 0.0518228   | -3.32224  | 0.0203491  | -4.48205 | -1.34505   |
| PIK3R3   | 0.253422    | 1.22671 | 0.00628996  | -1.38821 | 0.0363201  | -3.67104  | 0.0738368   | -1.70293  | 0.0080574  | -4.50331 | 0.0718519  |
| TP53BP1  | 0.191210    | 1.84104 | 0.013118    | -1.40334 | 0.0274874  | -1.40334  | 0.0274874   | -1.40334  | 0.0084513  | -4.57263 | 0.014164   |
| MBOAT1   | 0.0036784   | 1.83845 | 0.054976    | -1.59938 | 0.0288504  | -2.48837  | 0.00187957  | -2.94704  | 0.0136203  | -4.57474 | 0.173106   |
| GYG1     | 0.117737    | 1.22775 | 0.0590329   | -1.63848 | 0.0269973  | -3.7739   | 0.0159847   | -2.01165  | 0.0275931  | -4.63342 | 0.0568296  |
| KTNAL1   | 0.187856    | 1.28933 | 0.0954326   | -1.28933 | 0.0274874  | -3.63307  | 0.0186032   | -3.94044  | 0.0036687  | -4.66632 | 0.0769671  |
| FAM64C   | 0.000151847 | 2.38455 | 0.199178    | -1.30603 | 0.0221943  | -1.99378  | 0.0140223   | -3.1143   | 0.00470007 | -4.74229 | -1.52686   |
| ZC3HAV1L | 0.082495    | 1.38596 | 0.014242    | -1.46388 | 0.034537   | -2.027461 | -2.82069    | 0.027461  | -2.82069   | -4.7865  | 0.252594   |
| CLC1     | 0.000165988 | 2.37452 | 0.199712    | -1.34759 | 0.00943322 | -2.04358  | 0.00148782  | -3.19987  | 0.00180866 | -4.85253 | 0.0741094  |
| ANKK2P2  | 0.0094222   | 2.40881 | 0.0447382   | -1.69677 | 0.0089701  | -2.51336  | 0.0182432   | -3.64772  | 0.0084513  | -4.72763 | 0.014164   |
| CTNNA1   | 0.160943    | 1.11984 | 0.0199904   | -1.44082 | 0.0199904  | -3.19215  | 0.0200334   | -2.3189   | 0.00382756 | -5.13752 | 0.0092765  |
| NPC1     | 0.0327133   | 1.63156 | 0.03474     | -1.3467  | 0.0365103  | -3.14888  | 0.00826264  | -2.19723  | 0.00617869 | -5.1376  | 0.0027095  |
| TPST1    | 0.0711539   | 1.63661 | 0.073671    | -1.11339 | 0.0444443  | -3.33501  | 0.0751456   | -1.55487  | 0.0034607  | -5.33467 | 0.0069552  |
| CRIM1    | 0.0135826   | 1.72361 | 0.0611767   | -1.32346 | 0.0490247  | -3.18563  | 0.00527514  | -2.28114  | 0.0186987  | -5.4908  | 0.00454657 |
| SH2D2A   | 0.0120844   | 2.02574 | 0.00490969  | -2.77655 | 0.00490969 | -2.77655  | 0.00190058  | -2.69706  | 0.0041498  | -5.62456 | 0.0092322  |
| ERN1     | 0.0125268   | 1.91519 | 0.0209008   | -2.03497 | 0.0073597  | -3.0052   | 0.00386083  | -3.89736  | 0.00518703 | -5.75552 | 0.178128   |
| CRK2L1   | 0.0958972   | 1.39661 | 0.0215948   | -1.63421 | 0.0215948  | -1.63421  | 0.0215948   | -1.63421  | 0.00518703 | -5.89913 | -1.86352   |
| TBK1     | 0.00152361  | 2.97171 | 0.240503    | -1.10364 | 0.030502   | -2.05205  | 0.00727051  | -3.27971  | 0.00557329 | -6.08809 | 0.0585535  |
| SLC1A4   | 0.0456114   | 1.39432 | 0.0164043   | -3.0405  | 0.0143944  | -4.37558  | 0.00085862  | -4.23942  | 0.0103652  | -6.10093 | 0.0126491  |
| STOM     | 0.0026957   | 3.15389 | 0.0244174   | -1.20034 | 0.0344485  | -1.94075  | 0.00259577  | -3.78573  | 0.00665307 | -6.12091 | 0.0368782  |
| FACGL1   | 0.0420114   | 1.66188 | 0.045026    | -1.30929 | 0.0189431  | -2.90929  | 0.0189431   | -2.90929  | 0.0043689  | -6.12091 | 0.0061804  |
| PHACTR2  | 0.0197976   | 2.1235  | 0.000158255 | -2.3582  | 0.0214872  | -2.98937  | 0.00426335  | -5.00763  | 0.00261913 | -6.34793 | 0.29189    |
| GALNT3   | 0.0749899   | 1.26115 | 0.56637     | -1.11777 | 0.0328758  | -2.50491  | 0.295545    | -1.391    | 0.0350504  | -6.51215 | 0.0094753  |
| ARID2    | 0.0047854   | 1.42657 | 0.148483    | -1.40893 | 0.00623023 | -4.67704  | 0.00521304  | -5.67798  | 0.0035705  | -6.57298 | -1.26765   |
| UNKNOWNN | 0.0117643   | 2.91816 | 0.662053    | -1.09569 | 0.095773   | -2.2674   | 0.0319968   | -3.19739  | 0.00805204 | -6.61665 | 0.146589   |
| PIK3AP1  | 0.005689    | 1.50323 | 0.00931001  | -1.42813 | 0.00931001 | -4.40381  | 0.00957582  | -2.14681  | 0.0036406  | -6.61966 | 0.0455906  |
| UNKNOWNN | 0.0229876   | 1.56156 | 0.189417    | -1.58827 | 0.0059039  | -4.26118  | 0.0943058   | -2.48018  | 0.00259989 | -6.65407 | 0.106231   |
| TLX3     | 0.0385455   | 1.93871 | 0.146571    | -1.39844 | 0.0279349  | -1.58764  | 0.0175564   | -3.61827  | 0.0094876  | -6.72927 | -2.86829   |
| PLEXA5   | 0.304265    | 1.45764 | 0.0431515   | -2.21279 | 0.00467823 | -4.62896  | 0.0025536   | -3.22545  | 0.0119763  | -6.74443 | 0.0116667  |
| DUSP10   | 0.0208958   | 3.10753 | 0.465729    | -1.19387 | 0.00425221 | -2.18633  | 0.0258938   | -3.70999  | 0.00491791 | -6.79471 | 0.115425   |
| ANKA2    | 0.253946    | 1.39661 | 0.0239246   | -1.01803 | 0.0214872  | -4.85037  | 0.01416293  | -3.70999  | 0.00491791 | -6.79471 | -1.8313    |
| PTGDR    | 0.0291546   | 1.58251 | 0.129484    | -1.62677 | 0.00952846 | -4.42195  | 0.0676344   | -2.57438  | 0.00427871 | -6.99784 | 0.0970549  |
| FRMD4B   | 0.122785    | 1.28533 | 0.0759013   | -1.54222 | 0.0346233  | -4.92222  | 0.0476342   | -2.914    | 0.0133886  | -7.09332 | 0.133364   |
| ANXA2    | 0.0391703   | 3.66734 | 0.00645051  | -1.74551 | 0.0447965  | -1.95644  | 0.0267121   | -6.40138  | 0.0204153  | -7.17492 | 0.535334   |
| EOMES    | 0.0015058   | 2.93498 | 0.241962    | -1.52702 | 0.0084771  | -2.62625  | 0.0160234   | -6.79718  | 0.0024896  | -7.17492 | -1.12084   |
| CADM1    | 0.052074    | 1.37864 | 0.0202724   | -2.84157 | 0.0289571  | -5.23347  | 0.0222449   | -3.91755  | 0.0120537  | -7.21507 | 0.28727    |
| MAF      | 0.0354317   | 1.60456 | 0.264936    | -1.64936 | 0.0083929  | -4.4993   | 0.00614224  | -4.25105  | 0.00113806 | -7.21937 | 0.0197814  |
| NR3C1    | 0.0385455   | 1.93871 | 0.0240551   | -1.39844 | 0.00314364 | -2.90539  | 0.00325254  | -3.90336  | 0.0070798  | -7.27294 | 0.0669552  |
| NBEAL2   | 0.0112494   | 2.22995 | 0.0163264   | -2.38181 | 2.52E-06   | -3.74255  | 0.00274559  | -5.31132  | 0.00177255 | -7.45975 | 0.0094859  |
| PPP2R2B  | 0.0826817   | 1.25592 | 0.00759091  | -2.02288 | 0.00759091 | -5.98603  | 0.00789152  | -2.54058  | 0.0117562  | -7.51799 | 0.0694094  |
| PELO     | 0.0107182   | 2.37058 | 0.0371392   | -1.96375 | 0.0857317  | -3.18988  | 0.0186105   | -4.65523  | 0.0428704  | -7.58977 | 0.170736   |
| SLC4A4   | 0.0181743   | 1.61279 | 0.23801     | -1.28015 | 0.00865262 | -4.22461  | 0.00865262  | -4.22461  | 0.00865262 | -7.62065 | 0.0069166  |
| KLF1     | 0.295583    | 1.1044  | 0.086264    | -1.59807 | 0.0676072  | -7.10683  | 0.0263505   | -1.74591  | 0.0127119  | -7.74597 | 0.0416145  |
| NR3C1    | 0.00301153  | 3.90866 | 0.0217722   | -1.41245 | 0.0299182  | -2.03016  | 0.00034848  | -5.58039  | 0.0019427  | -8.00286 | 0.08759    |
| FGS2     | 0.0222778   | 3.9777  | 0.368924    | -1.22759 | 0.159616   | -2.0389   | 0.00366224  | -4.88297  | 0.00366224 | -8.11014 | 0.100037   |
| TGFB3    | 0.0180451   | 2.41474 | 0.00718025  | -1.01942 | 0.0180451  | -3.30317  | 0.00092096  | -5.91118  | 0.00092096 | -8.18817 | 0.0801867  |
| PRF1     | 0.0302019   | 1.23368 | 0.0447407   | -1.79574 | 0.0153324  | -6.6186   | 0.0282762   | -2.21536  | 0.011556   | -8.16521 | 0.0620215  |
|          |             |         |             |          |            |           |             |           |            |          |            |

## Supplementary Table 4 Differentially regulated genes among TSCM and TN

| Gene Symbol | p-value(TSCM vs. TN) | Fold-Change(TSCM vs. TN) | p-value(TSCM vs. TCM) | Fold-Change(TSCM vs. TCM) | p-value(TSCM vs. TEM) | Fold-Change(TSCM vs. TEM) | p-value(TN vs. TCM) | Fold-Change(TN vs. TCM) | p-value(TN vs. TEM) | Fold-Change(TN vs. TEM) |
|-------------|----------------------|--------------------------|-----------------------|---------------------------|-----------------------|---------------------------|---------------------|-------------------------|---------------------|-------------------------|
| GZMK        | 0.00497381           | 75.0522                  | 0.239584              | -1.26205                  | 0.693754              | -1.17197                  | 0.00929638          | -94.7195                | 0.00626343          | -87.9588                |
| GPR15       | 0.00217539           | 70.1816                  | 0.223374              | -1.43443                  | 0.6913765             | -1.33005                  | 0.0196687           | -48.3009                | 0.0322341           | -45.8745                |
| CCL5        | 0.00444921           | 32.679                   | 0.74343               | -1.03011                  | 0.00603524            | -1.43937                  | 0.0075545           | -33.663                 | 0.00295064          | -47.0371                |
| EPHA4       | 0.000455354          | 10.3023                  | 0.0555098             | -1.45813                  | 0.61964               | -1.16331                  | 0.00163882          | -15.0221                | 0.0131437           | -11.9847                |
| ENTPD1      | 0.0089102            | 9.34916                  | 0.252552              | -1.69392                  | 0.312745              | 1.88898                   | 0.00815629          | -15.8367                | 0.035838            | -14.9546                |
| CST3        | 0.00403939           | 8.00631                  | 0.0193134             | -2.8512                   | 0.030605              | -4.13029                  | 0.00162655          | -21.6716                | 0.00678962          | -33.3943                |
| TIGIT       | 0.00145008           | 7.82849                  | 0.0336586             | -1.49884                  | 0.470843              | -1.31538                  | 0.00352079          | -11.7344                | 0.0164199           | -10.2974                |
| KLRD1       | 0.00430347           | 7.71349                  | 0.122727              | -1.53638                  | 0.0511963             | -6.41623                  | 0.0143551           | -4.81623                | 0.0172311           | -49.4915                |
| IRF4        | 0.00462503           | 6.46448                  | 0.241133              | 1.30362                   | 0.11049               | 1.60089                   | 0.000525078         | -4.95887                | 0.0124287           | -4.03806                |
| FAS         | 0.00361856           | 6.04861                  | 0.0117075             | -1.81016                  | 0.1336                | -2.04396                  | 0.0046892           | -10.949                 | 0.0154631           | -12.3594                |
| FAM129A     | 0.00416919           | 5.87993                  | 0.00515485            | -3.46155                  | 0.0196464             | -2.71332                  | 0.0047987           | -20.3537                | 0.00705909          | -16.5642                |
| PTPR18      | 0.00446348           | 5.17656                  | 0.0433618             | -1.40557                  | 0.595662              | -1.20572                  | 0.0056687           | -7.27604                | 0.026371            | -4.29333                |
| STRGALNAC2  | 0.00155001           | 5.0845                   | 0.0323896             | -1.63568                  | 0.132357              | -2.60026                  | 0.004299            | -3.1662                 | 0.0157509           | -13.221                 |
| MCOLN2      | 0.00479449           | 5.00442                  | 0.0216347             | -1.54622                  | 0.359022              | -1.39796                  | 0.00649586          | -7.74794                | 0.0389763           | -6.99547                |
| ZEB2        | 0.00208667           | 4.61123                  | 0.00107252            | -1.95859                  | 0.0203743             | -6.97726                  | 0.00170489          | -0.03362                | 0.00895865          | -32.1812                |
| F2R         | 0.00489907           | 4.54255                  | 0.353924              | -1.39095                  | 0.0147183             | -2.17584                  | 0.036073            | -6.31848                | 0.00350518          | -9.88387                |
| CD58        | 0.00471822           | 4.26874                  | 0.004386              | -2.12697                  | 0.00212238            | -2.85231                  | 0.000512353         | -0.07948                | 0.0016947           | -12.1758                |
| SLAMF1      | 0.000732404          | 4.24662                  | 0.786797              | 1.02942                   | 0.616299              | -1.13751                  | 0.00585728          | -11.2525                | 0.0203264           | -8.83058                |
| SEE1        | 0.00161558           | 4.14664                  | 0.0070793             | -2.13723                  | 0.0903694             | -2.36598                  | 0.0063499           | -9.8695                 | 0.0084177           | -9.77624                |
| HAVCR1      | 0.00757869           | 4.01234                  | 0.0218798             | 2.5117                    | 0.00953128            | 4.83783                   | 0.128895            | -1.59746                | 0.568285            | 1.20574                 |
| STSSIA1     | 0.00777112           | 3.9827                   | 0.122733              | -1.34792                  | 0.7017                | -1.04361                  | 0.0031738           | -5.36836                | 0.000483408         | -4.1564                 |
| PLXND1      | 0.00372958           | 3.96404                  | 0.689101              | -2.04155                  | 0.00884386            | -4.84705                  | 0.0125457           | -8.00279                | 0.00266967          | -19.2139                |
| FOSL2       | 0.00301153           | 3.95096                  | 0.021722              | -1.41245                  | 0.0299182             | -2.03016                  | 0.00348448          | -5.59039                | 0.00194327          | -8.02086                |
| MYBL1       | 0.00689762           | 3.93023                  | 0.0403337             | -1.57598                  | 0.0143397             | -5.95765                  | 0.000565471         | -6.19395                | 0.00138638          | -23.4149                |
| ITGB1       | 0.00774226           | 3.75504                  | 0.0339428             | -1.45958                  | 0.948283              | -1.0186                   | 0.0076458           | -5.4808                 | 0.0675381           | -2.64232                |
| SLC27A2     | 0.000461133          | 3.36985                  | 0.431135              | -1.15132                  | 0.328427              | 1.12724                   | 0.0102803           | -3.87953                | 0.0107161           | -2.98928                |
| USP46       | 0.00239229           | 2.88694                  | 0.224866              | -1.86582                  | 0.0267936             | -3.86589                  | 0.00793862          | -4.79382                | 0.0107032           | -4.22299                |
| STOM        | 0.00289587           | 3.15389                  | 0.0424174             | -1.20034                  | 0.0344885             | -1.94075                  | 0.00029677          | -3.78573                | 0.00695307          | -6.12091                |
| EDARADD     | 0.00997853           | 3.09673                  | 0.286824              | -1.2297                   | 0.489998              | -1.31283                  | 0.00297583          | -3.80806                | 0.0224433           | -4.06549                |
| ARID5B      | 0.000307001          | 2.99301                  | 0.0132295             | -1.47146                  | 0.423938              | 1.17216                   | 0.000464105         | -4.40013                | 0.0226915           | -2.55112                |
| MAP3K1      | 0.0012236            | 2.97171                  | 0.240319              | -1.03264                  | 0.205026              | -2.05205                  | 0.0087426           | -2.46642                | 0.10229             | -6.09809                |
| MYO1F       | 0.00583135           | 2.96031                  | 0.052977              | -1.62434                  | 0.00853022            | -2.88121                  | 0.00792721          | -4.80854                | 0.00105004          | -8.52927                |
| CLDN11      | 0.00427788           | 2.94177                  | 0.0176366             | -1.23802                  | 0.973318              | 1.00185                   | 0.00129176          | -3.64197                | 0.00532009          | -2.93634                |
| ECMES       | 0.00195058           | 2.93308                  | 0.241966              | -1.57202                  | 0.0064771             | -2.45894                  | 0.0324695           | -6.41087                | 0.000940476         | -7.21227                |
| USP16       | 0.00239229           | 2.88694                  | 0.0152222             | -2.22805                  | 0.0781054             | -1.46279                  | 0.00297311          | -4.53226                | 0.0107032           | -4.22299                |
| IL2RB       | 0.00672448           | 2.80796                  | 0.150478              | -1.24565                  | 0.328279              | -1.69239                  | 0.00348626          | -3.49773                | 0.0165061           | -3.92916                |
| NCAPH       | 0.00784854           | 2.76233                  | 0.0144006             | -3.90517                  | 0.0420337             | -2.74215                  | 0.00124699          | -10.5742                | 0.00519856          | -7.57472                |
| LRIG1       | 0.00893925           | 2.58571                  | 0.085408              | -1.36406                  | 0.0297177             | -1.23479                  | 0.00323754          | -3.52707                | 0.00466887          | -3.1928                 |
| MAP3K1      | 0.00949677           | 2.5628                   | 0.463519              | -1.03908                  | 0.0405162             | 2.0104                    | 0.00364288          | -2.46642                | 0.10229             | -1.27477                |
| IGSF9B      | 0.00114372           | 2.44439                  | 0.123321              | -1.67205                  | 0.000274191           | 2.79013                   | 0.0181146           | -4.08708                | 0.063643            | 1.14146                 |
| TPSTAN18    | 0.00603435           | 2.4259                   | 0.00225649            | -1.95388                  | 1.606                 | 0.00105193                | -4.73992            | 0.165273                | -1.51052            | 0.0395629               |
| FAM64C      | 0.000151847          | 2.38455                  | 0.199178              | -1.30603                  | 0.0221943             | -1.99378                  | 0.0140223           | -3.11443                | 0.00470007          | -4.75429                |
| CLIC1       | 0.000165968          | 2.37452                  | 0.190712              | -1.34759                  | 0.00943322            | -2.04358                  | 0.0146782           | -3.19987                | 0.00188066          | -4.85253                |
| MICAL2      | 0.00527063           | 2.3108                   | 0.068199              | -2.29365                  | 0.0181416             | -3.84023                  | 0.0234568           | -5.30018                | 0.012336            | -9.80002                |
| UNKNOWN     | 0.00114806           | 2.27372                  | 0.664192              | 1.046                     | 0.043842              | 1.89092                   | 0.0102888           | -2.17373                | 0.37209             | -1.20244                |
| THBS1       | 0.00128369           | 2.22071                  | 0.539797              | -1.06979                  | 0.00260658            | -5.30129                  | 0.0062272           | -2.37571                | 0.000626317         | -11.7726                |
| ANKK1       | 0.00364447           | 2.15586                  | 0.108782              | -1.34387                  | 0.889531              | -1.02834                  | 0.0107954           | -2.8972                 | 0.0596801           | -2.21697                |
| ANKAP2      | 0.00949222           | 2.14981                  | 0.0447382             | -1.69677                  | 0.00869701            | -2.31306                  | 0.0196343           | -5.64772                | 0.00040153          | -4.97293                |
| IGSF9B      | 0.0059778            | 2.14643                  | 0.0288649             | -1.60588                  | 0.0798602             | 2.02718                   | 0.0062955           | -3.45483                | 0.77962             | -1.05882                |
| PTPRM       | 0.00797741           | 2.1391                   | 0.0243441             | -2.16065                  | 0.00891706            | -9.47301                  | 0.00644218          | -6.62186                | 0.00244364          | -20.2638                |
| JCSD1       | 0.00792942           | 2.09948                  | 0.0397542             | -1.28809                  | 0.107469              | -1.16643                  | 0.00242313          | -2.70432                | 0.00288626          | -2.4489                 |
| ANKK1       | 0.00403359           | 2.09702                  | 0.0493339             | -1.36518                  | 0.0374452             | -1.79878                  | 0.000701818         | -2.85862                | 0.00751324          | -3.76788                |
| YARS        | 0.00214378           | 2.09481                  | 0.42092               | 1.05589                   | 0.758219              | 1.04693                   | 0.00696937          | -1.98393                | 0.0189785           | -2.00091                |
| CLIC1       | 0.00206263           | 2.07474                  | 0.125021              | -1.44159                  | 0.0100777             | -2.0698                   | 0.0123989           | -2.99093                | 0.00301585          | -4.29431                |
| GPRIN3      | 0.00580303           | 2.06225                  | 0.202811              | -1.13832                  | 0.221458              | -1.26223                  | 0.000639582         | -2.34749                | 0.0159104           | -2.60303                |
| SNORD115-11 | 0.000597972          | 2.01807                  | 0.326499              | -1.01373                  | 0.00350397            | 1.89763                   | 0.0102489           | -1.59075                | 0.223474            | -1.0691                 |
| ILEST       | 0.00356465           | -2.02168                 | 0.63256               | 1.11083                   | 0.013613              | 2.85814                   | 0.0319896           | 2.24575                 | 0.00231292          | 5.77825                 |
| OCLR        | 0.000932905          | -2.06016                 | 0.623403              | 1.08672                   | 0.335076              | 1.18123                   | 0.0236452           | 2.23881                 | 0.0152507           | 2.43662                 |
| OSBP1       | 0.00425357           | -2.09942                 | 0.543527              | 1.05539                   | 0.028139              | -2.05199                  | 0.0147978           | 2.21571                 | 0.075666            | 1.02311                 |
| SDK1        | 0.0038422            | -2.12094                 | 0.00377869            | 1.60841                   | 0.0163392             | 2.24881                   | 0.0014058           | 3.41134                 | 0.00245489          | -4.7896                 |
| C2orf67     | 0.00625527           | -2.17733                 | 0.625733              | 1.08461                   | 0.293231              | 1.10665                   | 0.0103956           | 2.36154                 | 0.00681867          | 2.40953                 |
| EDAR        | 0.00829007           | -2.20373                 | 0.0674126             | 1.91592                   | 0.0154425             | 2.20811                   | 0.00718816          | 4.22218                 | 0.00906716          | 4.86607                 |
| DEPDC7      | 0.00403787           | -2.36577                 | 0.108697              | 1.22587                   | 0.0579152             | 1.84732                   | 0.00766005          | 2.90012                 | 0.0088158           | 3.89719                 |
| CYP2J2      | 0.00215069           | -2.36721                 | 0.68546               | 1.07188                   | 0.169417              | 1.32641                   | 0.0134624           | 2.53736                 | 0.012163            | 3.1399                  |
| IGF1R       | 0.00274585           | -2.38555                 | 0.00118727            | 2.20018                   | 0.18204               | 1.96741                   | 0.00169582          | 5.25525                 | 0.0339947           | 4.69926                 |
| LRRN1       | 0.00325955           | -2.67153                 | 0.000883301           | 1.81412                   | 0.0244968             | 2.89665                   | 0.000610973         | 4.84648                 | 0.00324048          | 7.73848                 |
| CAMSAP1L1   | 0.00503477           | -2.74164                 | 0.142829              | 1.64365                   | 0.125904              | 1.53688                   | 0.0667792           | 1.66802                 | 0.00865233          | 4.21304                 |
| TNFRD3T1    | 0.000189005          | -2.79014                 | 0.166291              | 1.16442                   | 0.0876496             | 1.37686                   | 0.00419686          | 3.2489                  | 0.00471325          | 3.84162                 |
| KCNK5       | 0.00125711           | -3.05317                 | 0.0610743             | 1.31551                   | 0.147051              | 1.8071                    | 0.00202647          | 4.01648                 | 0.0147442           | 5.51738                 |
| SLC40A1     | 0.00149271           | -3.14034                 | 0.0511072             | -1.51702                  | 0.0400159             | 1.71975                   | 0.00605869          | 2.07008                 | 0.00730159          | 5.40059                 |
| RBM11       | 0.000510298          | -3.21077                 | 0.246056              | 1.37006                   | 0.039999              | 2.38066                   | 0.0211581           | 4.38994                 | 0.00603877          | 7.64375                 |
| MEST        | 0.00571298           | -3.37228                 | 0.28702               | 1.14307                   | 0.14307               | 1.81005                   | 0.0389158           | 5.83389                 | 0.0100097           | 6.10399                 |
| NBEA        | 0.00532862           | -3.62383                 | 0.389431              | 1.0011                    | 0.0101654             | 2.03419                   | 0.00651575          | 3.62792                 | 0.000182885         | 7.37175                 |
| PTPRK       | 0.00780948           | -3.96543                 | 0.256671              | 1.30618                   | 0.0238035             | 1.70926                   | 0.00866956          | 5.17956                 | 0.00137403          | 6.77796                 |
| NRCAM       | 0.00183407           | -8.8258                  | 0.259817              | 1.92422                   | 0.042739              | 2.54878                   | 0.0140954           | 16.9828                 | 0.00285062          | 22.495                  |

## Supplementary Table 5 Differentially regulated genes among TSCM and TCM

| Gene Symbol | p-value(TSCM vs. TN) | Fold-Change(TSCM vs. TN) | p-value(TSCM vs. TCM) | Fold-Change(TSCM vs. TCM) | p-value(TSCM vs. TEM) | Fold-Change(TSCM vs. TEM) | p-value(TN vs. TCM) | Fold-Change(TN vs. TCM) | p-value(TN vs. TEM) | Fold-Change(TN vs. TEM) | p-value(TCM vs. TEM) | Fold-Change(TCM vs. TEM) |
|-------------|----------------------|--------------------------|-----------------------|---------------------------|-----------------------|---------------------------|---------------------|-------------------------|---------------------|-------------------------|----------------------|--------------------------|
| TMD4        | 0.392733             | -1.1021                  | 0.00292324            | 3.31465                   | 0.0086716             | 6.46749                   | 0.00800144          | 3.65306                 | 0.002142            | 7.1278                  | 0.0262516            | 1.95118                  |
| MYB         | 0.178035             | 1.33191                  | 0.0098121             | 2.96185                   | 0.0021667             | 8.68021                   | 0.0373774           | 2.22376                 | 0.00177171          | 6.51711                 | 0.0249431            | 2.93668                  |
| FCER1G      | 0.880899             | -1.02503                 | 0.0060208             | 2.60439                   | 0.0228718             | 3.11916                   | 0.0225581           | 2.66957                 | 0.0156817           | 3.19722                 | 0.248259             | 1.19765                  |
| PPFIBP2     | 0.00970509           | -1.78824                 | 0.00974233            | 2.33102                   | 0.00972407            | 3.1754                    | 0.00200262          | 4.16844                 | 0.00197413          | 5.6784                  | 0.0140039            | 1.36224                  |
| IGF1R       | 0.00274585           | -2.38855                 | 0.00118727            | 2.20018                   | 0.18204               | 1.96741                   | 0.00169528          | 5.25525                 | 0.0339947           | 4.69926                 | 0.786129             | -1.11832                 |
| HMGES3      | 0.0155736            | 1.68247                  | 0.00382397            | -2.02835                  | 0.0018968             | 1.24741                   | 0.00743696          | -3.41264                | 0.0574914           | -1.34878                | 0.00137723           | 2.53017                  |
| TGFBR3      | 0.0180451            | 2.41474                  | 0.00718025            | -2.10423                  | 0.0198162             | -3.37037                  | 0.00900298          | -5.08118                | 0.0055393           | -8.13858                | 0.0801087            | -1.60171                 |
| GLUL        | 0.104252             | 1.48133                  | 0.00351802            | -2.12636                  | 0.0630072             | -1.92767                  | 0.00876766          | -3.14984                | 0.00116078          | -2.85552                | 0.565709             | 1.10307                  |
| CD58        | 0.00471822           | 4.26874                  | 0.004396              | -2.12697                  | 0.00212238            | -2.85231                  | 0.000512353         | -9.07948                | 0.0016947           | -12.1758                | 0.041692             | -1.34102                 |
| PHACTR2     | 0.0197976            | 2.12335                  | 0.000158255           | -2.3582                   | 0.0214872             | -2.98837                  | 0.00483335          | -5.00763                | 0.00266193          | -6.34793                | 0.29189              | -1.26765                 |
| SLFN11      | 0.00891487           | 1.35781                  | 0.00878864            | -2.61708                  | 0.013494              | -2.72891                  | 0.00842128          | -3.55351                | 0.012338            | -3.70535                | 0.577454             | -1.04273                 |
| DUSP4       | 0.0672968            | 3.447                    | 0.00140747            | -2.73593                  | 0.0716567             | -4.01946                  | 0.0269673           | -9.43073                | 0.0136127           | -13.855                 | 0.455959             | -1.46914                 |
| IL9R        | 0.000425002          | 1.27573                  | 0.0086405             | -2.7395                   | 0.0847807             | -1.63759                  | 0.00534571          | -3.49486                | 0.0431312           | -2.08912                | 0.113002             | 1.67289                  |
| IL9R        | 0.000425002          | 1.27573                  | 0.0086405             | -2.7395                   | 0.0847807             | -1.63759                  | 0.00534571          | -3.49486                | 0.0431312           | -2.08912                | 0.113002             | 1.67289                  |
| HNRPLL      | 0.0320315            | 1.37181                  | 0.00627977            | -2.91008                  | 0.0311274             | -3.13523                  | 0.00431571          | -3.95206                | 0.0299005           | -4.30053                | 0.743676             | -1.07737                 |
| ALOX5AP     | 0.20606              | -1.2352                  | 0.0088366             | -3.16399                  | 0.0271138             | -4.20016                  | 0.0474545           | -2.56151                | 0.0207969           | -3.40037                | 0.418584             | -1.32749                 |
| TOX         | 0.0455931            | 1.78642                  | 0.00463429            | -3.34874                  | 0.0421255             | -5.03344                  | 0.00188422          | -5.98227                | 0.0177365           | -8.99186                | 0.268384             | -1.50308                 |
| FAM129A     | 0.00416919           | 5.87993                  | 0.00515485            | -3.46155                  | 0.0196464             | -2.71332                  | 0.00447987          | -20.3637                | 0.00705909          | -15.9542                | 0.205219             | 1.27576                  |
| PRRS4       | 0.0731053            | 2.12998                  | 0.00842123            | -4.34862                  | 0.0242373             | -8.68834                  | 0.00203686          | -9.25179                | 0.00894646          | -18.5059                | 0.128653             | -2.00025                 |
| CCR4        | 0.0113644            | 2.05957                  | 0.0011714             | -16.1374                  | 0.202573              | -2.67881                  | 0.000864425         | -33.236                 | 0.0698114           | -5.51719                | 0.9000197            | 6.02408                  |

# Supplementary Table 6 Differentially regulated genes among TSCM and TEM

| Gene Symbol | p-value(TSCM vs. TN) | Fold-Change(TSCM vs. TN) | p-value(TSCM vs. TCM) | Fold-Change(TSCM vs. TCM) | p-value(TSCM vs. TEM) | Fold-Change(TSCM vs. TEM) | p-value(TN vs. TEM) | Fold-Change(TN vs. TEM) | p-value(TSCM vs. TEM) | Fold-Change(TSCM vs. TEM) | p-value(TN vs. TCM) | Fold-Change(TN vs. TCM) | p-value(TCM vs. TEM) | Fold-Change(TCM vs. TEM) |
|-------------|----------------------|--------------------------|-----------------------|---------------------------|-----------------------|---------------------------|---------------------|-------------------------|-----------------------|---------------------------|---------------------|-------------------------|----------------------|--------------------------|
| SEI         | 0.467595             | 1.0849                   | 0.252693              | 1.13116                   | 0.0045254             | 30.868                    | 0.27387             | 1.02623                 | 0.0082692             | 28.2452                   | 0.0082692           | 28.2452                 | 0.0082692            | 28.2452                  |
| DSCI1       | 0.178677             | -1.39142                 | 1.12244               | 1.86372                   | 0.00361216            | 14.3566                   | 0.0140565           | 2.73236                 | 0.00138229            | 19.8765                   | 0.0140565           | 2.73236                 | 0.00138229           | 19.8765                  |
| MYB         | 0.178035             | 1.33191                  | 0.0098121             | 2.96185                   | 0.0021667             | 8.68021                   | 0.0373774           | 2.22376                 | 0.00177171            | 6.51711                   | 0.0373774           | 2.22376                 | 0.00177171           | 6.51711                  |
| LEF1        | 0.0150759            | -1.23562                 | 0.0885569             | 1.25608                   | 0.00825779            | 7.34183                   | 0.00538289          | 1.52024                 | 0.00870699            | 5.84502                   | 0.00538289          | 1.52024                 | 0.00870699           | 5.84502                  |
| TMD4        | 0.392323             | -1.1021                  | 0.0232324             | 3.31465                   | 0.0086716             | 6.46749                   | 0.00090344          | 3.65330                 | 0.002142              | 7.1276                    | 0.0086716           | 6.46749                 | 0.002142             | 7.1276                   |
| SESN3       | 0.0427483            | 2.57498                  | 0.0819508             | -1.17751                  | 0.00157746            | 6.14378                   | 0.028145            | -0.33206                | 0.075412              | 2.38595                   | 0.0819508           | -1.17751                | 0.00157746           | 6.14378                  |
| LOC283174   | 0.0211947            | 3.17819                  | 0.0940848             | -1.66348                  | 0.006709              | 5.00089                   | 0.0213093           | -5.28866                | 0.00691769            | 1.58612                   | 0.0940848           | -1.66348                | 0.006709             | 5.00089                  |
| HAVCR1      | 0.00757869           | 4.01234                  | 0.0218798             | 2.5117                    | 0.00951128            | 4.83783                   | 0.128889            | -1.59746                | 0.568285              | 1.20574                   | 0.0218798           | 2.5117                  | 0.00951128           | 4.83783                  |
| NO3         | 0.0287452            | -2.36486                 | 0.0183887             | 4.04517                   | 0.00631113            | 4.43306                   | 0.00513863          | 9.56667                 | 0.00410394            | 10.4862                   | 0.0183887           | 4.04517                 | 0.00631113           | 4.43306                  |
| TFAB4       | 0.0431436            | -1.75373                 | 0.0655441             | 1.60411                   | 0.00155366            | 4.20665                   | 0.066558            | 2.81318                 | 0.00135155            | 7.37381                   | 0.0655441           | 1.60411                 | 0.00155366           | 4.20665                  |
| SELP        | 0.000727813          | 1.73087                  | 0.403103              | -1.16541                  | 0.00757484            | 4.03855                   | 0.0339872           | -2.01729                | 0.0247537             | 2.33311                   | 0.403103            | -1.16541                | 0.00757484           | 4.03855                  |
| CCNE1       | 0.0497242            | 1.19044                  | 0.215854              | 1.50368                   | 0.00666673            | 3.39942                   | 0.339731            | 1.26313                 | 0.0037024             | 2.8556                    | 0.215854            | 1.50368                 | 0.00666673           | 3.39942                  |
| OCM         | 0.358932             | 1.91035                  | 0.488958              | 1.17453                   | 0.0093928             | 3.22412                   | 0.433706            | 1.1625                  | 0.0019486             | 3.19109                   | 0.488958            | 1.17453                 | 0.0093928            | 3.22412                  |
| FAM153B     | 0.0406805            | -1.42768                 | 0.0890125             | 1.33303                   | 0.00635873            | 3.1924                    | 0.0602238           | 1.90314                 | 0.00019142            | 4.55773                   | 0.0890125           | 1.33303                 | 0.00635873           | 3.1924                   |
| PPFBP2      | 0.00970509           | -1.78824                 | 0.00974233            | 2.33102                   | 0.00972407            | 3.1754                    | 0.00202022          | 4.16844                 | 0.00197413            | 5.6784                    | 0.00974233          | 2.33102                 | 0.00972407           | 3.1754                   |
| OCM2        | 0.636401             | -1.03388                 | 0.332784              | 1.15258                   | 0.00140659            | 2.93399                   | 0.194078            | 1.19162                 | 0.00060648            | 3.03338                   | 0.332784            | 1.15258                 | 0.00140659           | 2.93399                  |
| LRRIC16A    | 0.00114372           | -1.69386                 | 0.149153              | 1.33124                   | 0.00836459            | 2.8304                    | 0.0283534           | 2.25094                 | 0.0027091             | 4.79292                   | 0.149153            | 1.33124                 | 0.00836459           | 2.8304                   |
| IGSF9B      | 0.00114372           | 2.44435                  | 0.123321              | -1.67205                  | 0.000274191           | 2.79013                   | 0.0181146           | -4.08708                | 0.0036343             | 1.41146                   | 0.123321            | -1.67205                | 0.000274191          | 2.79013                  |
| ZC3H12D     | 0.0023819            | 1.77145                  | 0.0584697             | 1.45599                   | 0.000362854           | 2.6961                    | 0.130573            | -1.21667                | 0.00310587            | 1.52197                   | 0.0584697           | 1.45599                 | 0.000362854          | 2.6961                   |
| WNT7A       | 0.241275             | 1.11277                  | 0.986515              | 1.00163                   | 0.00381162            | 2.48233                   | 0.132687            | -1.11095                | 0.00113532            | 2.23077                   | 0.986515            | 1.00163                 | 0.00381162           | 2.48233                  |
| FAM117B     | 0.0543794            | -1.23605                 | 0.0076279             | 1.51866                   | 0.00190752            | 2.4717                    | 0.0117159           | 1.87701                 | 0.0044003             | 3.05514                   | 0.0076279           | 1.51866                 | 0.00190752           | 2.4717                   |
| BEND5       | 0.0315357            | -1.36523                 | 0.280312              | 1.24888                   | 0.00210697            | 2.47085                   | 0.0382186           | 1.70501                 | 0.00631391            | 3.37328                   | 0.280312            | 1.24888                 | 0.00210697           | 2.47085                  |
| PEL1        | 0.0717668            | 1.44276                  | 0.0698226             | 1.42619                   | 0.00116701            | 1.42619                   | 0.807712            | -1.01162                | 0.0278541             | 1.59437                   | 0.0698226           | 1.42619                 | 0.00116701           | 1.42619                  |
| LMO7        | 0.0232286            | -1.5267                  | 0.225677              | 1.34762                   | 0.00494167            | 2.28789                   | 0.0613674           | 2.05741                 | 0.00105863            | 3.48293                   | 0.225677            | 1.34762                 | 0.00494167           | 2.28789                  |
| CEP88       | 0.25325              | -2.5325                  | 0.19398               | 1.40454                   | 0.0035356             | 2.02826                   | 0.0237201           | 1.30973                 | 0.0030157             | 1.89134                   | 0.19398             | 1.40454                 | 0.0035356            | 2.02826                  |
| ZNF238      | 0.203962             | -1.14016                 | 0.0892134             | 1.14537                   | 0.001317              | 2.1422                    | 0.0017633           | 1.30591                 | 0.00740518            | 2.52457                   | 0.0892134           | 1.14537                 | 0.001317             | 2.1422                   |
| C17orf48    | 0.0332872            | -1.50435                 | 0.134263              | 1.37629                   | 0.00305636            | 2.19066                   | 0.0474169           | 2.07043                 | 0.00431586            | 3.29553                   | 0.134263            | 1.37629                 | 0.00305636           | 2.19066                  |
| MAP2D       | 0.00669663           | -1.65528                 | 0.0639104             | 1.25915                   | 0.00269378            | 2.14859                   | 0.0207445           | 2.08426                 | 0.00104162            | 3.55207                   | 0.0639104           | 1.25915                 | 0.00269378           | 2.14859                  |
| ZSWIM1      | 0.331561             | -1.12305                 | 0.65809               | 1.03377                   | 0.00997778            | 2.13007                   | 0.110643            | 1.16097                 | 0.028074              | 2.40228                   | 0.65809             | 1.03377                 | 0.00997778           | 2.13007                  |
| LDHB        | 0.119173             | -1.11997                 | 0.436715              | 1.40043                   | 0.0026919             | 2.06819                   | 0.127475            | 1.2768                  | 0.00290202            | 2.31744                   | 0.436715            | 1.40043                 | 0.0026919            | 2.06819                  |
| BW2         | 0.517911             | -1.04219                 | 0.0504053             | 1.58478                   | 0.00470697            | 2.06222                   | 0.0446668           | 1.65163                 | 0.00146712            | 2.14922                   | 0.0504053           | 1.58478                 | 0.00470697           | 2.06222                  |
| CRTG3       | 0.308414             | 1.07239                  | 0.0640092             | 1.40454                   | 0.0035356             | 2.02826                   | 0.0237201           | 1.30973                 | 0.0030157             | 1.89134                   | 0.0640092           | 1.40454                 | 0.0035356            | 2.02826                  |
| MXRA7       | 0.00530335           | 1.46491                  | 0.0653788             | -1.25857                  | 0.00732335            | -2.02843                  | 0.0202662           | -1.8437                 | 0.00551716            | -2.97148                  | 0.0653788           | -1.25857                | 0.00732335           | -2.02843                 |
| CLC1        | 0.000165968          | 2.37452                  | 0.190712              | -1.34759                  | 0.00943322            | -2.04358                  | 0.0148782           | -3.19987                | 0.00188066            | -8.52523                  | 0.190712            | -1.34759                | 0.00943322           | -2.04358                 |
| NAT13       | 0.0372563            | 1.2115                   | 0.108359              | -1.36009                  | 0.00380923            | -2.05918                  | 0.0406645           | -1.64775                | 0.00778579            | -2.49469                  | 0.108359            | -1.36009                | 0.00380923           | -2.05918                 |
| TBC1D2B     | 0.271236             | 1.10663                  | 0.0729759             | -1.3252                   | 0.00565301            | -2.07807                  | 0.114332            | -1.4665                 | 0.00240344            | -2.29664                  | 0.0729759           | -1.3252                 | 0.00565301           | -2.07807                 |
| GLCC11      | 0.764555             | -1.02064                 | 0.0391198             | -1.2114                   | 0.00184141            | -2.1114                   | -1.1869             | 0.00186222              | -2.0687               | 0.0135549                 | -1.02064            | 0.0391198               | 0.00184141           | -2.1114                  |
| DUSP10      | 0.0208958            | 3.10753                  | 0.465729              | -1.19387                  | 0.00425221            | -2.18633                  | 0.0258939           | -3.70999                | 0.00491971            | -8.7941                   | 0.465729            | -1.19387                | 0.00425221           | -2.18633                 |
| APOBEC3D    | 0.0449161            | 1.46258                  | 0.0203188             | -1.62894                  | 0.00928018            | -2.23181                  | 0.00219252          | -2.82321                | 0.018013              | -3.2643                   | 0.0203188           | -1.62894                | 0.00928018           | -2.23181                 |
| CACNB3      | 0.0702367            | 1.39541                  | 0.0105111             | -1.68772                  | 0.00139565            | -2.30777                  | 0.0142975           | -2.35507                | 0.00316527            | -3.22203                  | 0.0105111           | -1.68772                | 0.00139565           | -2.30777                 |
| ANXA2P2     | 0.00948222           | 2.14981                  | 0.0447382             | -1.69677                  | 0.00899701            | -2.31306                  | 0.0198343           | -3.64772                | 0.00840153            | -4.97263                  | 0.0447382           | -1.69677                | 0.00899701           | -2.31306                 |
| TPRG1       | 0.0385455            | 3.04857                  | 0.0240551             | -1.93644                  | 0.00314364            | -2.38539                  | 0.00532254          | -5.90336                | 0.00790788            | -7.27204                  | 0.0240551           | -1.93644                | 0.00314364           | -2.38539                 |
| EDMES       | 0.00150508           | 2.93308                  | 0.241966              | -1.57202                  | 0.0064771             | -2.45894                  | 0.0324695           | -4.61087                | 0.000904876           | -7.21227                  | 0.241966            | -1.57202                | 0.0064771            | -2.45894                 |
| MATK        | 0.0241342            | 1.77404                  | 0.409541              | -1.19423                  | 0.00163301            | -2.46351                  | 0.0365457           | -2.1186                 | 0.00265222            | -4.36504                  | 0.409541            | -1.19423                | 0.00163301           | -2.46351                 |
| ARHGAP10    | 0.000465304          | -1.2551                  | 0.017977              | -1.30638                  | 0.00902164            | -2.47104                  | 0.824027            | -1.04086                | 0.030575              | -1.9688                   | 0.017977            | -1.30638                | 0.00902164           | -2.47104                 |
| ADAM8       | 0.000465304          | 1.7226                   | 0.00365572            | -1.55274                  | 0.00311766            | -2.48769                  | 0.00151303          | -2.67476                | 0.00173831            | -4.2853                   | 0.00365572          | -1.55274                | 0.00311766           | -2.48769                 |
| MANN1       | 0.0176308            | 1.34504                  | 0.117549              | -1.16881                  | 0.00675988            | -2.58619                  | 0.00189862          | -1.5721                 | 0.00121487            | -3.47852                  | 0.117549            | -1.16881                | 0.00675988           | -2.58619                 |
| SUFLN2L     | 0.0346639            | 1.69663                  | 0.0983984             | -1.46707                  | 0.00282366            | -2.75956                  | 0.013792            | -2.39997                | 0.0068414             | -4.43911                  | 0.0983984           | -1.46707                | 0.00282366           | -2.75956                 |
| SH2D2A      | 0.0120844            | 2.02574                  | 0.0210689             | -1.3314                   | 0.00490969            | -2.77655                  | 0.00190058          | -2.69706                | 0.0041498             | -5.62456                  | 0.0210689           | -1.3314                 | 0.00490969           | -2.77655                 |
| EPF2C4      | 0.0545947            | 1.3672                   | 0.0956482             | -1.73684                  | 0.00548232            | -2.83673                  | 0.00512464          | -2.37324                | 0.0118463             | -3.87839                  | 0.0956482           | -1.73684                | 0.00548232           | -2.83673                 |
| CD58        | 0.00471822           | 4.26974                  | 0.0430486             | -2.12897                  | 0.00212238            | -2.85291                  | 0.000512353         | -8.07948                | 0.0016947             | -12.1758                  | 0.0430486           | -2.12897                | 0.00212238           | -2.85291                 |
| MYO1F       | 0.00583135           | 2.96301                  | 0.052977              | -1.62434                  | 0.00853022            | -2.88121                  | 0.00792721          | -4.80854                | 0.00106004            | -8.52927                  | 0.052977            | -1.62434                | 0.00853022           | -2.88121                 |
| RAB27B      | 0.0750696            | 1.49817                  | 0.0762185             | -2.24221                  | 0.00881874            | -2.99166                  | 0.0518228           | -3.33224                | 0.0203491             | -4.8202                   | 0.0762185           | -2.24221                | 0.00881874           | -2.99166                 |
| ERN1        | 0.0212688            | 1.91519                  | 0.0200909             | -2.03497                  | 0.0073597             | -3.0052                   | 0.00386083          | -3.89736                | 0.00518703            | -5.75552                  | 0.0200909           | -2.03497                | 0.0073597            | -3.0052                  |
| NPC1        | 0.0327133            | 1.63156                  | 0.03474               | -1.3467                   | 0.00365103            | -3.14888                  | 0.0028624           | -2.19723                | 0.00617869            | -4.1376                   | 0.03474             | -1.3467                 | 0.00365103           | -3.14888                 |
| NBEAL2      | 0.0112494            | 2.22995                  | 0.0163264             | -2.38181                  | 0.0025206             | -3.34526                  | 0.00274559          | -5.31132                | 0.00177255            | -7.45975                  | 0.0163264           | -2.38181                | 0.0025206            | -3.34526                 |
| APOBEC3G    | 0.748311             | -1.05882                 | 0.0256601             | -1.79605                  | 0.00948943            | -3.38529                  | 0.0441537           | -1.69612                | 0.00682943            | -3.18684                  | 0.0256601           | -1.79605                | 0.00948943           | -3.38529                 |
| SVTL2       | 0.571532             | 1.19733                  | 0.739243              | 1.05275                   | 0.00725533            | -3.64016                  | 0.443176            | -1.13734                | 0.026762              | -4.35846                  | 0.739243            | 1.05275                 | 0.00725533           | -3.64016                 |
| SLC44A4     | 0.0318743            | 1.81279                  | 0.238015              | -1.28015                  | 0.0089362             | -4.22451                  | 0.0245667           | -2.32065                | 0.00986106            | -7.65815                  | 0.238015            | -1.28015                | 0.0089362            | -4.22451                 |
| UNKNOWN     | 0.0229876            | 1.56156                  | 0.198417              | -1.58827                  | 0.00580939            | -4.26118                  | 0.0943508           | -2.8018                 | 0.00255969            | -6.65407                  | 0.198417            | -1.58827                | 0.00580939           | -4.26118                 |
| PIK3A1      | 0.005689             | 1.50323                  | 0.217086              | -1.42813                  | 0.00931001            | -4.40381                  | 0.0597582           | -2.14681                | 0.0036406             | -6.61996                  | 0.217086            | -1.42813                | 0.00931001           | -4.40381                 |
| PTGDR       | 0.0291546            | 1.58251                  | 0.129484              | -1.62677                  | 0.00958246            | -4.42195                  | 0.0676344           | -2.57438                | 0.00427871            | -6.99778</                |                     |                         |                      |                          |

# Supplementary Table7 Differentially regulated genes among TN and TCM

| Gene Symbol | p-value(TSCM vs. TN) | Fold-Change(TSCM vs. TN) | p-value(TSCM vs. TCM) | Fold-Change(TSCM vs. TCM) | p-value(TSCM vs. TEM) | Fold-Change(TSCM vs. TEM) | p-value(TN vs. TCM) | Fold-Change(TN vs. TCM) | p-value(TN vs. TEM) | Fold-Change(TN vs. TEM) | p-value(TCM vs. TEM) | Fold-Change(TCM vs. TEM) |
|-------------|----------------------|--------------------------|-----------------------|---------------------------|-----------------------|---------------------------|---------------------|-------------------------|---------------------|-------------------------|----------------------|--------------------------|
| NOG         | 0.00368              | 4.02611                  | 0.02631               | 4.02611                   | 0.00368               | 4.02611                   | 0.00368             | 4.02611                 | 0.00368             | 4.02611                 | 0.00368              | 4.02611                  |
| SULT1B1     | 0.013697             | -6.00719                 | 0.189641              | 1.83317                   | 0.0590558             | 4.04532                   | 0.0037328           | 1.97002                 | 0.00340866          | 20.2557                 | 0.006361             | 2.20673                  |
| AK5         | 0.0143577            | -6.69939                 | 0.124661              | 1.81689                   | 0.0836468             | 3.83549                   | 0.0166457           | 8.53831                 | 0.0148797           | 18.0244                 | 0.012196             | 1.11101                  |
| UBE2E2      | 0.0538358            | -2.75872                 | 0.0251461             | 2.85764                   | 0.0187504             | 4.51889                   | 0.009456            | 7.88343                 | 0.00665592          | 12.4666                 | 0.272629             | 1.58137                  |
| CNR3        | 0.0029248            | -3.72285                 | 0.1144924             | 1.52673                   | 0.0431262             | 1.97104                   | 0.00169528          | 5.69889                 | 0.0247773           | 7.3419                  | 0.004702             | 1.29102                  |
| IGF1R       | 0.00274585           | -2.38855                 | 0.0018727             | 2.20018                   | 0.18204               | 1.96741                   | 0.00169528          | 5.25225                 | 0.0399477           | 4.69926                 | 0.017829             | -1.11832                 |
| PTRK4       | 0.00780948           | -3.96543                 | 0.256571              | 1.30618                   | 0.0238035             | 1.70926                   | 0.00869596          | 5.17956                 | 0.00137403          | 6.77796                 | 0.118497             | 1.3086                   |
| PFT1        | 0.100588             | -1.100588                | 0.232851              | 1.45724                   | 0.145724              | 1.45724                   | 0.00470538          | 5.0854                  | 0.00202649          | 4.59146                 | 0.002629             | -1.08544                 |
| LRN1        | 0.0035955            | -2.67153                 | 0.00883301            | 1.80422                   | 0.0244668             | 2.96665                   | 0.00610973          | 4.84848                 | 0.00324048          | 7.73484                 | 0.0935411            | 1.59672                  |
| EDAR        | 0.0029007            | -2.20373                 | 0.0674126             | 1.91582                   | 0.0154425             | 2.20811                   | 0.00718816          | 4.22218                 | 0.00906716          | 4.86607                 | 0.560819             | 1.1525                   |
| PPFIB2      | 0.00970509           | -1.78824                 | 0.00974233            | 2.33102                   | 0.00974207            | 3.1754                    | 0.00200262          | 4.16844                 | 0.00197413          | 5.6784                  | 0.0140039            | 1.36224                  |
| KOR1L1      | 0.00192371           | -3.08139                 | 0.0619743             | 1.31591                   | 0.147037              | 1.80715                   | 0.00026547          | 4.01868                 | 0.0141362           | 4.01868                 | 0.0017328            | 1.37588                  |
| TMD4        | 0.392733             | -1.1021                  | 0.00292324            | 3.31465                   | 0.0086716             | 6.46749                   | 0.00080144          | 6.36306                 | 0.002142            | 7.1278                  | 0.0026216            | 1.95118                  |
| NBEA        | 0.00532862           | -3.62393                 | 0.989431              | 1.0111                    | 0.0101654             | 2.03419                   | 0.00851575          | 3.67292                 | 0.000182885         | 7.37175                 | 0.0241657            | 2.03195                  |
| CSG13       | 0.0194105            | -2.23877                 | 0.0233782             | 1.55373                   | 0.0202631             | 1.2331                    | 0.00215128          | 3.47719                 | 0.012002            | 5.69633                 | 0.246246             | 1.62857                  |
| SDK2        | 0.00385422           | -2.12094                 | 0.00377969            | 1.60841                   | 0.0163392             | 2.24881                   | 0.00140568          | 3.41134                 | 0.00245489          | 4.7696                  | 0.107115             | 1.39816                  |
| GJB6        | 0.00270628           | -1.72597                 | 0.012777              | 1.98545                   | 0.0278187             | 3.10529                   | 0.00262196          | 3.92931                 | 0.00509916          | 5.39693                 | 0.087846             | 1.57994                  |
| TXNRD3IT1   | 0.000190005          | -2.79014                 | 0.169291              | 1.16442                   | 0.0876496             | 1.37686                   | 0.00419666          | 3.2489                  | 0.00471325          | 3.84162                 | 0.424713             | 1.18244                  |
| FRK1        | 0.00226267           | -1.49222                 | 0.00412842            | 1.76267                   | 0.00154491            | 1.80715                   | 0.00026547          | 3.18622                 | 0.008565            | 2.84134                 | 0.289352             | -1.06160                 |
| DEPDC7      | 0.00403787           | -2.36577                 | 0.108697              | 1.22587                   | 0.0579152             | 1.64732                   | 0.00766005          | 2.90012                 | 0.00368158          | 3.20254                 | 0.120476             | 1.3438                   |
| AGL3        | 0.000760132          | -1.97854                 | 0.0290301             | 1.36908                   | 0.133105              | 1.64239                   | 0.00215203          | 2.70878                 | 0.0309627           | 3.24264                 | 0.435133             | 1.19963                  |
| RTT2        | 0.370173             | -1.19011                 | 0.0219252             | 1.21913                   | 0.0232657             | 3.55507                   | 0.00455775          | 2.67628                 | 0.00841658          | 4.5064                  | 0.0101619            | 1.57736                  |
| FLNB        | 0.0030378            | -1.47973                 | 0.00134201            | 1.74924                   | 0.0879198             | 2.04304                   | 0.0039753           | 2.55841                 | 0.0276962           | 3.20616                 | 0.530926             | 1.16796                  |
| NUCB2       | 0.00210164           | -1.50737                 | 0.0402664             | 1.68997                   | 0.0788336             | 1.79649                   | 0.00895657          | 2.56089                 | 0.0125546           | 2.70797                 | 0.728696             | 1.0574                   |
| PAK1        | 0.00511423           | -1.96047                 | 0.134373              | 1.39019                   | 0.134373              | 1.39019                   | 0.00430618          | 1.99809                 | 0.0078761           | 3.96919                 | 0.00732972           | -1.30502                 |
| PCP212923   | 0.00120439           | -1.65745                 | 0.0203792             | 1.47186                   | 0.0203792             | 1.47186                   | 0.00026547          | 2.45426                 | 0.00841658          | 4.5064                  | 0.006548             | 1.66812                  |
| GAL3ST4     | 0.00548412           | -1.54171                 | 0.0261167             | 1.5782                    | 0.0112249             | 2.02833                   | 0.0023375           | 2.43312                 | 0.00645137          | 3.1271                  | 0.180111             | 1.28522                  |
| ZSCAN23     | 0.0143943            | -1.94941                 | 0.153067              | 0.562503                  | 1.12488               | 1.02488                   | 0.007914            | 2.35955                 | 0.0436762           | 3.20254                 | 0.041305             | -1.07602                 |
| ENPF2       | 0.0511156            | -1.59999                 | 0.0631318             | 1.45205                   | 0.00720694            | 1.39241                   | 0.00989807          | 2.32326                 | 0.0140662           | 2.22784                 | 0.71814              | -1.04283                 |
| GATM        | 0.0444948            | -1.60419                 | 0.160419              | 1.43981                   | 0.160419              | 1.43981                   | 0.00454973          | 2.89743                 | 0.00546918          | 2.67414                 | 0.002497             | 1.15792                  |
| MAL         | 0.10662              | -1.40875                 | 0.0216165             | 1.63099                   | 0.0195328             | 1.62687                   | 0.00851417          | 2.29765                 | 0.022314            | 8.81979                 | 0.0541989            | 3.83871                  |
| LGMN        | 0.0237874            | -1.94034                 | 0.0509171             | 1.18355                   | 0.0149549             | 2.4704                    | 0.00601602          | 2.29649                 | 0.0146204           | 4.79342                 | 0.0346647            | 2.08728                  |
| TNFRSF10D   | 0.00111948           | -1.71294                 | 0.0314303             | 1.31773                   | 0.0314303             | 1.31773                   | 0.00026547          | 2.25719                 | 0.00454973          | 2.67414                 | 0.002497             | 1.15792                  |
| APBA2       | 0.0170104            | -1.55431                 | 0.11898               | 1.42467                   | 0.0239041             | 3.26437                   | 0.00945143          | 2.21437                 | 0.021907            | 5.07394                 | 0.021907             | 2.29132                  |
| GPR125      | 0.0127645            | -2.0023                  | 0.530861              | 1.10385                   | 0.292232              | 1.20153                   | 0.00710124          | 2.21025                 | 0.00471349          | 2.40583                 | 0.0254282            | 1.08849                  |
| CHML        | 0.0624947            | -1.58437                 | 0.116507              | 1.30888                   | 0.160303              | 1.21007                   | 0.00057928          | 2.12123                 | 0.000721969         | 2.07564                 | 0.602168             | -1.02197                 |
| MAP2        | 0.00355274           | -1.44622                 | 0.00355274            | 1.44622                   | 0.00355274            | 1.44622                   | 0.00026547          | 1.20234                 | 0.00026547          | 1.20234                 | 0.00026547           | 1.20234                  |
| LAMP1       | 0.0066683            | -1.65288                 | 0.0636104             | 1.25916                   | 0.00286378            | 2.1459                    | 0.00274415          | 2.04826                 | 0.00184182          | 3.55207                 | 0.0270446            | 1.70423                  |
| SLC04A1     | 0.00149271           | -3.14034                 | 0.0511072             | 1.51702                   | 0.0400159             | 1.71975                   | 0.00605869          | 2.70808                 | 0.00730159          | 5.40059                 | 0.041444             | 2.60889                  |
| SNORD115-11 | 0.000226454          | -1.97287                 | 0.790166              | 1.01425                   | 0.790166              | 1.01425                   | 0.00026547          | 1.81534                 | 0.00305121          | -2.00998                | 0.0067969            | 1.84121                  |
| SNORD115-11 | 0.000226454          | -1.97287                 | 0.790166              | 1.01425                   | 0.00287606            | 1.81534                   | 0.00305121          | -2.00998                | 0.170102            | -1.08678                | 0.00967969           | 1.84121                  |
| SNORD115-11 | 0.000226454          | -1.97287                 | 0.790166              | 1.01425                   | 0.00287606            | 1.81534                   | 0.00305121          | -2.00998                | 0.170102            | -1.08678                | 0.00967969           | 1.84121                  |
| SNORD115-11 | 0.000226454          | -1.97287                 | 0.790166              | 1.01425                   | 0.00287606            | 1.81534                   | 0.00305121          | -2.00998                | 0.170102            | -1.08678                | 0.00967969           | 1.84121                  |
| SNORD115-26 | 0.00484848           | -1.61825                 | 0.0630041             | 1.24516                   | 0.00995238            | 1.81534                   | 0.00305121          | -2.00998                | 0.0358888           | -1.96728                | 0.785285             | 1.02425                  |
| EZR         | 0.0484848            | -1.61825                 | 0.0630041             | 1.24516                   | 0.00995238            | 1.81534                   | 0.00305121          | -2.00998                | 0.0358888           | -1.96728                | 0.785285             | 1.02425                  |
| FAM160B1    | 0.0304377            | -1.28752                 | 0.0105893             | -1.57125                  | 0.0535221             | -1.86296                  | 0.00195671          | -2.02302                | 0.0295623           | -2.39859                | 0.347706             | -1.18565                 |
| SNORD115-12 | 0.000533272          | -1.98743                 | 0.0016327             | 1.80737                   | 0.0029749             | 1.80737                   | 0.0016327           | 1.80737                 | 0.0016327           | 1.80737                 | 0.0016327            | 1.80737                  |
| SNORD115-12 | 0.000533272          | -1.98743                 | 0.0016327             | 1.80737                   | 0.0029749             | 1.80737                   | 0.0016327           | 1.80737                 | 0.0016327           | 1.80737                 | 0.0016327            | 1.80737                  |
| SNORD115-12 | 0.000533272          | -1.98743                 | 0.0016327             | 1.80737                   | 0.0029749             | 1.80737                   | 0.0016327           | 1.80737                 | 0.0016327           | 1.80737                 | 0.0016327            | 1.80737                  |
| CLSTN3      | 0.00890614           | -1.53534                 | 0.0764763             | -1.34947                  | 0.0172097             | -1.99453                  | 0.00422362          | -2.09646                | 0.00203957          | -3.05895                | 0.00128991           | -1.47801                 |
| MAP2B       | 0.0123566            | -1.62356                 | 0.0140103             | 1.23111                   | 0.0024833             | 1.23111                   | 0.0024833           | 1.23111                 | 0.0024833           | 1.23111                 | 0.0024833            | 1.23111                  |
| P2RY8       | 0.0123566            | -1.62356                 | 0.0140103             | 1.23111                   | 0.0024833             | 1.23111                   | 0.0024833           | 1.23111                 | 0.0024833           | 1.23111                 | 0.0024833            | 1.23111                  |
| DCBLD1      | 0.0101759            | -1.96776                 | 0.289785              | -1.05735                  | 0.015913              | -1.61371                  | 0.0031025           | -2.08061                | 0.0204186           | -1.79216                | 0.0085222            | -1.52618                 |
| CHEK1       | 0.0267573            | -1.24904                 | 0.0118796             | -1.5733                   | 0.476676              | -1.07928                  | 0.0013551           | -2.09602                | 0.0472281           | -1.34807                | 0.0087354            | 1.55038                  |
| LRWD1       | 0.0162024            | -1.72418                 | 0.01768               | 1.29101                   | 0.0024833             | 1.23111                   | 0.0024833           | 1.23111                 | 0.0024833           | 1.23111                 | 0.0024833            | 1.23111                  |
| SNORD115-20 | 0.0124719            | -1.86955                 | 0.0625288             | -1.13798                  | 0.0198678             | -1.57889                  | 0.00300961          | -2.12683                | 0.00608652          | -1.96728                | 0.00608652           | 1.79675                  |
| FAM53B      | 0.0977467            | -1.26095                 | 0.00335127            | -1.71551                  | 0.0167665             | -2.75586                  | 0.00374111          | -2.15316                | 0.00468793          | -3.47499                | 0.051909             | -1.60644                 |
| CTD8        | 0.002324             | -1.602324                | 0.002324              | -1.602324                 | 0.002324              | -1.602324                 | 0.002324            | -1.602324               | 0.002324            | -1.602324               | 0.002324             | -1.602324                |
| ACTN4       | 0.0341505            | -1.3467                  | 0.0431144             | -1.43993                  | 0.00280679            | -2.25365                  | 0.00328851          | -2.17523                | 0.00792453          | -3.40448                | 0.042838             | -1.56511                 |
| NPC1        | 0.0327133            | -1.63156                 | 0.0327133             | -1.63156                  | 0.0327133             | -1.63156                  | 0.0327133           | -1.63156                | 0.0327133           | -1.63156                | 0.0327133            | -1.63156                 |
| SLCO3A1     | 0.0122288            | -1.68259                 | 0.0370251             | -1.30839                  | 0.400509              | -1.15632                  | 0.00227753          | -2.20148                | 0.028378            | -1.94361                | 0.446676             | -1.33821                 |
| ITIH3       | 0.0576968            | -1.58764                 | 0.0467487             | -1.01707                  | 0.0467487             | -1.01707                  | 0.0467487           | -1.01707                | 0.0467487           | -1.01707                | 0.0467487            | -1.01707                 |
| PAM         | 0.0199218            | -1.75101                 | 0.0916121             | -1.29988                  | 0.0086571             | -1.18623                  | 0.00160009          | -2.27628                | 0.00563512          | -2.9466                 | 0.12893              | -2.29408                 |
| CRM1        | 0.0135826            | -1.72361                 | 0.0611767             | -1.32346                  | 0.0490247             | -1.85653                  | 0.00257214          | -2.29114                | 0.0189887           | -5.4908                 | 0.0454657            | -1.40782                 |
| ITIH1       | 0.028303             | -1.62803                 | 0.00896909            | -1.42349                  | 0.00896909            | -1.42349                  | 0.00896909          | -1.42349                | 0.00896909          | -1.42349                | 0.00896909           | -1.42349                 |
| ETV6        | 0.00191191           | -1.84544                 | 0.125118              | -1.23921                  | 0.15319               | -1.09873                  | 0.00512845          | -2.28577                | 0.0112588           | -1.67879                | 0.112754             | 1.36156                  |
| FTH1        | 0.00059882           | -1.98908                 | 0.0250916             | -1.16223                  | 0.737006              | -1.04594                  | 0.0012032           | -2.29984                | 0.0260958           | -2.08046                | 0.395706             | 1.05405                  |
| RAE27A      | 0.0120287            | -1.78758                 | 0.0435844             | -1.28704                  | 0.0435888             | -1.81193                  | 0.0059162           | -2.30069                | 0.00578785          | -3.22896                | 0.0602635            | -1.40782                 |
| BMP1        | 0.0181887            | -1.91587                 | 0.18233               | -1.29323                  | 0.18233               | -1.29323                  | 0.0043014           | -2.40029                | 0.0026762           | -3.74662                | 0.031475             | 1.2116                   |
| ARHGAP18    | 0.017825             | -1.75225                 | 0.0205522             | -2.52609                  | 0.0047281             | -2.30569                  | 0.0047281           | -2.30569                | 0.0143144           | -4.42634                | 0.10009              | -1.92141                 |
| MYO1C       | 0.0338759            | -1.4657                  | 0.0467768             | -1.60886                  | 0.279955              | -1.31683                  | 0.00411528          | -2.34334                | 0.0380935           | -1.91823                | 0.132464             | 1.22146                  |
| OPD3        | 0.0580303            | -1.20832                 | 0.0208                |                           |                       |                           |                     |                         |                     |                         |                      |                          |

|          |             |         |            |          |            |          |            |          |            |          |            |          |
|----------|-------------|---------|------------|----------|------------|----------|------------|----------|------------|----------|------------|----------|
| NCAPH    | 0.00784854  | 2.76233 | 0.0144006  | -3.90517 | 0.0420337  | -2.74215 | 0.00124699 | -10.7874 | 0.00519856 | -7.57472 | 0.172949   | 1.42413  |
| FAS      | 0.0038196   | 6.04861 | 0.0117875  | -1.81016 | 0.1336     | -2.04896 | 0.0048802  | -10.949  | 0.0154631  | -12.3994 | 0.675078   | -1.13247 |
| TIGIT    | 0.00145008  | 7.82949 | 0.0336596  | -1.48894 | 0.470843   | -1.31538 | 0.0032079  | -11.7344 | 0.0164199  | -10.2974 | 0.759548   | 1.13955  |
| CDH1     | 0.079209    | 2.75838 | 0.0169505  | -4.34523 | 0.134166   | 2.44033  | 0.00214294 | -11.9858 | 0.371855   | -1.13033 | 0.00539789 | 10.6038  |
| EPHA4    | 0.000455354 | 10.3023 | 0.0555098  | -1.45813 | 0.61964    | -1.16331 | 0.00163882 | -15.0221 | 0.0131437  | -11.8947 | 0.332974   | 1.25344  |
| ENTPD1   | 0.00890102  | 9.34916 | 0.252552   | -1.69392 | 0.312745   | 1.86998  | 0.00815629 | -15.8367 | 0.038338   | -4.95456 | 0.026307   | 3.19539  |
| FLI16686 | 0.0185017   | 3.67103 | 0.0446678  | -4.34908 | 0.00743623 | -7.45856 | 0.00430776 | -15.9656 | 0.0102081  | -27.3806 | 0.389456   | -1.71497 |
| FAM129A  | 0.00416919  | 5.87993 | 0.00515485 | -3.46155 | 0.0196464  | -2.71332 | 0.00447987 | -20.3537 | 0.00705909 | -15.9542 | 0.205219   | 1.27576  |
| CS17     | 0.00403939  | 8.06281 | 0.0193134  | -2.6812  | 0.0380605  | -4.13029 | 0.00162365 | -21.6716 | 0.00578962 | -33.3843 | 0.372903   | -1.54047 |
| CCR4     | 0.0113644   | 2.05857 | 0.0011714  | -16.1374 | 0.202573   | -2.67881 | 0.00064425 | -33.236  | 0.0698114  | -5.51719 | 0.0901197  | 6.02408  |
| CCL5     | 0.00444921  | 32.679  | 0.74343    | -1.03011 | 0.00503524 | -1.43937 | 0.0075545  | -33.663  | 0.00295064 | -47.0371 | 0.0771795  | -1.39729 |
| GZMK     | 0.00497381  | 75.0522 | 0.295884   | -1.26205 | 0.693754   | -1.17197 | 0.00929638 | -94.7195 | 0.00826343 | -87.9588 | 0.829096   | 1.07686  |



# Supplementary Table 8 Differentially regulated genes among TN and TEM

| Gene Symbol | p-value(TSCM vs. TN) | Fold-Change(TSCM vs. TN) | p-value(TSCM vs. TCM) | Fold-Change(TSCM vs. TCM) | p-value(TSCM vs. TEM) | Fold-Change(TSCM vs. TEM) | p-value(TN vs. TCM) | Fold-Change(TN vs. TCM) | p-value(TN vs. TEM) | Fold-Change(TN vs. TEM) | p-value(TCM vs. TEM) | Fold-Change(TCM vs. TEM) |
|-------------|----------------------|--------------------------|-----------------------|---------------------------|-----------------------|---------------------------|---------------------|-------------------------|---------------------|-------------------------|----------------------|--------------------------|
| SEI         | 0.00145361           | 1.113186                 | 0.00249524            | 1.092654                  | 0.00249524            | 1.092654                  | 0.00249524          | 1.092654                | 0.00249524          | 1.092654                | 0.00249524           | 1.092654                 |
| NRCAM       | 0.00183407           | -8.8258                  | 0.259817              | 1.04222                   | 0.254878              | 0.0140954                 | 16.9828             | 0.00265062              | 22.49               | 0.384196                | 1.32458              |                          |
| SUL1B1      | 0.0133697            | -0.007019                | 0.189641              | 0.0590558                 | 0.04532               | 0.00307328                | 9.17902             | 0.00340866              | 20.2557             | 0.006361                | 2.20673              |                          |
| USC1        | 0.178877             | -1.39142                 | 0.12244               | 1.98372                   | 0.00361216            | 14.3569                   | 0.0140665           | 2.73236                 | 0.0138929           | 19.8765                 | 0.0126318            |                          |
| NOG         | 0.00536838           | 0.0287452                | 0.0287452             | 0.0287452                 | 0.00536838            | 0.0287452                 | 0.00536838          | 0.0287452               | 0.00536838          | 0.0287452               | 0.00536838           | 0.0287452                |
| LEF1        | 0.0150759            | -1.23562                 | 0.0585569             | 1.25608                   | 0.00825779            | 7.34183                   | 0.00538289          | 1.55204                 | 0.00870699          | 9.0177                  | 0.0170306            | 5.84502                  |
| LRRN1       | 0.0025955            | -2.67153                 | 0.00865301            | 1.81412                   | 0.0244988             | 2.95665                   | 0.00610973          | 4.84648                 | 0.00324048          | 7.73848                 | 0.0935411            | 1.59672                  |
| RRM11       | 0.000510298          | -2.12077                 | 0.246266              | 1.37006                   | 0.039989              | 2.38066                   | 0.0211581           | 4.39894                 | 0.0063877           | 7.64375                 | 0.0376119            | 1.73763                  |
| TFAB4       | 0.0431436            | -1.75373                 | 0.354641              | 1.60411                   | 0.00155366            | 0.066558                  | 2.81318             | 0.00135155              | 7.37381             | 0.112897                | 2.62117              |                          |
| NBEA        | 0.00632862           | -3.62393                 | 0.989431              | 1.0011                    | 0.0101654             | 2.03419                   | 0.00851575          | 3.2792                  | 0.00162885          | 7.37175                 | 0.0241657            | 2.03195                  |
| TM64        | 0.392733             | -1.1021                  | 0.0202324             | 3.31465                   | 0.00987478            | 6.49749                   | 0.00591748          | 3.55306                 | 0.0021242           | 7.1279                  | 0.0265116            | 1.95116                  |
| KRT73       | 0.495482             | -1.12752                 | 0.0640508             | 3.25343                   | 0.0173855             | 6.18711                   | 0.0165664           | 3.66831                 | 0.0026775           | 6.9761                  | 0.0140205            | 1.90172                  |
| PTPRK       | 0.00780948           | -3.96543                 | 0.255671              | 1.30618                   | 0.0238035             | 1.7026                    | 0.00866956          | 5.17956                 | 0.00174703          | 6.7796                  | 0.118497             | 1.3086                   |
| MYB         | 0.178035             | 1.33191                  | 0.0098121             | 2.96185                   | 0.0021667             | 8.68021                   | 0.0373774           | 2.22376                 | 0.00177171          | 6.51711                 | 0.0249431            | 2.93068                  |
| TSN2        | 0.168897             | 1.41768                  | 0.817598              | 1.85455                   | 0.0167533             | 9.00871                   | 0.188864            | 1.51076                 | 0.00243364          | 6.34273                 | 0.0038939            | 9.61255                  |
| LLEST       | 0.00356465           | -2.02168                 | 0.63256               | 1.11083                   | 0.013613              | 2.85814                   | 0.0310896           | 2.24575                 | 0.00231292          | 5.77825                 | 0.00792746           | 2.57297                  |
| PFPIBP2     | 0.00970509           | -1.78824                 | 0.00974233            | 2.33102                   | 0.00972407            | 3.1754                    | 0.00202062          | 4.16844                 | 0.00197413          | 5.6784                  | 0.0140039            | 1.36224                  |
| SLC40A1     | 0.00149271           | -3.14034                 | 0.0011072             | 1.51702                   | 0.0400159             | 1.71975                   | 0.00606869          | 2.07008                 | 0.00730159          | 5.40059                 | 0.0414414            | 2.60889                  |
| CLB8        | 0.00279628           | -1.72597                 | 1.85455               | 0.0278187                 | 3.10529               | 0.00281196                | 3.38231             | 0.00909166              | 5.39663             | 0.087846                | 1.57894              |                          |
| EPHA2       | 0.13694              | -1.78258                 | 0.822686              | 1.06706                   | 0.0362708             | 2.78694                   | 0.0846608           | 1.90212                 | 0.00371172          | 4.88474                 | 0.0124686            | 2.61179                  |
| BCL9        | 0.0356847            | -2.22703                 | 0.75678               | 1.04818                   | 0.0486984             | 2.19311                   | 0.0126126           | 2.33433                 | 0.000248249         | 4.96121                 | 0.0233955            | 2.0923                   |
| LOC203007   | 0.00282007           | -2.37345                 | 0.0674129             | 1.81592                   | 0.0145922             | 1.53689                   | 0.00918213          | 1.222123                | 0.00985253          | 4.86607                 | 0.558919             | 1.1525                   |
| LRRIC16A    | 0.001273             | 1.69086                  | 0.149743              | 1.33124                   | 0.00630459            | 2.8346                    | 0.0285334           | 2.25094                 | 0.0027091           | 4.79292                 | 0.021877             | 1.2193                   |
| SDK2        | 0.00385422           | -2.12094                 | 0.00377969            | 1.60841                   | 0.0163392             | 2.24881                   | 0.0014058           | 3.41134                 | 0.00245489          | 4.7696                  | 0.105115             | 1.39816                  |
| TFP1        | 0.100588             | -2.18429                 | 0.0382623             | 2.33351                   | 0.145724              | 2.14324                   | 0.00470538          | 5.08814                 | 0.00202649          | 4.68146                 | 0.0641129            | 1.98445                  |
| LOC1219293  | 0.00210438           | -1.82461                 | 0.0203782             | 1.22049                   | 1.471826              | 0.0176268                 | 1.652626            | 0.0024526               | 4.25626             | 0.0019212               | 1.3438               |                          |
| FAM153B     | 0.0406805            | -1.42768                 | 0.0801025             | 1.23203                   | 0.00635873            | 3.1924                    | 0.0602238           | 1.90314                 | 0.00191942          | 4.55773                 | 0.017118             | 1.39648                  |
| CHMP7       | 0.00585986           | -1.63599                 | 0.107089              | 1.38895                   | 0.010149              | 0.68467                   | 0.0021927           | 2.27231                 | 0.00410468          | 4.34909                 | 0.0088347            | 1.93287                  |
| KRT72       | 0.370173             | -1.19011                 | 0.0219252             | 2.19113                   | 0.0328657             | 3.65507                   | 0.00455275          | 2.80769                 | 0.00369687          | 4.39295                 | 0.068548             | 1.66812                  |
| CAM5AP1L    | 0.00504477           | -1.82461                 | 0.143872              | 1.24829                   | 0.143872              | 1.24829                   | 0.143872            | 1.24829                 | 0.143872            | 1.24829                 | 0.143872             | 1.24829                  |
| STXBP1      | 0.0427608            | -1.19438                 | 0.0405117             | 1.48229                   | 0.0115778             | 3.52381                   | 0.021094            | 1.70592                 | 0.00822834          | 4.20853                 | 0.0429125            | 2.46701                  |
| PTK2        | 0.0143369            | -1.81875                 | 0.509117              | 1.21728                   | 0.0257068             | 2.29919                   | 0.1655636           | 1.49411                 | 0.00554016          | 4.18165                 | 0.059478             | 2.79876                  |
| SLC7A8      | 0.0134083            | -3.38121                 | 0.0213103             | 1.72541                   | 0.472553              | 1.18727                   | 0.0131946           | 5.83397                 | 0.00582696          | 4.0144                  | 0.305484             | 1.45326                  |
| DEPTOR      | 0.02403787           | -1.82461                 | 0.198697              | 1.22049                   | 0.0079152             | 1.64732                   | 0.0038132           | 3.24899                 | 0.00471123          | 4.0144                  | 0.305484             | 1.45326                  |
| TNFRSD3T1   | 0.000190095          | -2.79014                 | 0.189291              | 1.16442                   | 0.087616              | 1.37686                   | 0.00419666          | 3.24899                 | 0.00471123          | 4.0144                  | 0.305484             | 1.45326                  |
| ANKRD31     | 0.0107563            | -2.47482                 | 0.347277              | 1.13348                   | 0.0117014             | 1.529                     | 0.0137527           | 2.80515                 | 0.00297852          | 3.78399                 | 0.157542             | 1.34894                  |
| RAG1-DOA    | 0.0022467            | -1.85745                 | 0.139197              | 1.36197                   | 0.0144406             | 1.91972                   | 0.00389121          | 1.92514                 | 0.00389121          | 1.92514                 | 0.00389121           | 1.92514                  |
| MAP1D       | 0.00666863           | -1.65528                 | 0.0636104             | 1.25916                   | 0.00286378            | 1.2459                    | 0.00274415          | 2.08426                 | 0.0184182           | 3.55207                 | 0.0270446            | 1.70423                  |
| LMO7        | 0.0293286            | -1.52677                 | 0.225677              | 1.34762                   | 0.00344167            | 2.28789                   | 0.0613674           | 2.05741                 | 0.01058639          | 3.49233                 | 0.127921             | 1.69773                  |
| GNAA1       | 0.197769             | -2.24082                 | 0.224082              | 1.41091                   | 0.0233441             | 1.73246                   | 0.0373971           | 2.79304                 | 0.00686893          | 3.42627                 | 0.286304             | 1.22719                  |
| NBEADS      | 0.00153587           | -1.85745                 | 0.288912              | 1.24829                   | 0.028912              | 1.64829                   | 0.0083186           | 1.70351                 | 0.00193765          | 4.25626                 | 0.0192944            | 1.39244                  |
| ZNF135      | 0.0272928            | -2.11507                 | 0.270104              | 1.32684                   | 0.0844529             | 1.5702                    | 0.0356079           | 2.81016                 | 0.00140868          | 3.32107                 | 0.0451786            | 1.18181                  |
| FAM153C     | 0.125067             | -1.49591                 | 0.0180384             | 1.35104                   | 0.0312979             | 2.20418                   | 0.0350747           | 2.02103                 | 0.00370561          | 3.29277                 | 0.011817             | 1.63147                  |
| CT10r48     | 0.0333272            | -1.50435                 | 0.134263              | 1.37629                   | 0.0030536             | 2.19066                   | 0.0474169           | 2.07043                 | 0.0431266           | 3.29253                 | 0.0374965            | 1.59171                  |
| HALL2       | 0.102917             | -1.82461                 | 0.079931              | 1.39811                   | 0.0145922             | 1.53689                   | 0.00918213          | 1.222123                | 0.00985253          | 4.86607                 | 0.558919             | 1.1525                   |
| TMEM220     | 0.0269253            | -2.05968                 | 0.11197               | 1.52774                   | 0.126272              | 1.54176                   | 0.0136092           | 3.14667                 | 0.00523471          | 3.17554                 | 0.081964             | 1.00917                  |
| GALNT4      | 0.00548412           | -1.54171                 | 0.0281167             | 1.5782                    | 0.0112249             | 2.02833                   | 0.0023375           | 2.43312                 | 0.00431507          | 3.17271                 | 0.180511             | 1.28622                  |
| FAM153B     | 0.0392869            | -1.12708                 | 0.0392869             | 1.39197                   | 0.0145922             | 1.53689                   | 0.00918213          | 1.222123                | 0.00985253          | 4.86607                 | 0.558919             | 1.1525                   |
| RAG1-DOA    | 0.0022467            | -1.85745                 | 0.139197              | 1.36197                   | 0.0144406             | 1.91972                   | 0.00389121          | 1.92514                 | 0.00389121          | 1.92514                 | 0.00389121           | 1.92514                  |
| FAM117B     | 0.0543794            | -1.23605                 | 0.0578279             | 1.51856                   | 0.0010752             | 2.4717                    | 0.0117159           | 1.87701                 | 0.0044003           | 3.05514                 | 0.0679078            | 1.62766                  |
| OCM2        | 0.638401             | -1.03388                 | 0.332784              | 1.15258                   | 0.00140589            | 1.95989                   | 0.194078            | 1.19162                 | 0.00606448          | 3.03338                 | 0.00741561           | 2.54558                  |
| UNKNOOWN    | 0.0036385            | -1.98901                 | 0.544015              | 1.49524                   | 0.013613              | 2.85814                   | 0.0310896           | 2.24575                 | 0.00231292          | 5.77825                 | 0.00792746           | 2.57297                  |
| PIM2        | 0.0058341            | -1.5372                  | 0.0450077             | 1.32401                   | 0.0199871             | 1.95277                   | 0.0100162           | 2.03066                 | 0.00362373          | 2.99501                 | 0.0570805            | 1.47489                  |
| CCNE1       | 0.0497242            | -1.19044                 | 0.215854              | 1.50368                   | 0.00666673            | 3.39942                   | 0.339731            | 1.26313                 | 0.0037024           | 2.8556                  | 0.0277398            | 2.26704                  |
| PRAGMIN     | 0.00226267           | -1.8922                  | 0.00412842            | 1.76287                   | 0.0015417             | 1.67908                   | 0.00129176          | 3.01662                 | 3.06E-05            | 2.84134                 | 0.280812             | 1.06169                  |
| CT10r10     | 0.0244945            | -1.85745                 | 0.139197              | 1.36197                   | 0.0144406             | 1.91972                   | 0.00389121          | 1.92514                 | 0.00389121          | 1.92514                 | 0.00389121           | 1.92514                  |
| RGM8        | 0.0786522            | -1.42335                 | 0.10852               | 1.0667371                 | 1.94006               | 0.0813559                 | 1.35253             | 0.00822602              | 2.76137             | 0.0012346               | 2.04166              |                          |
| ZNF542      | 0.0457114            | -1.56389                 | 0.09343               | 1.00112                   | 0.0157788             | 1.71632                   | 0.031475            | 1.56564                 | 0.0040627           | 2.68413                 | 0.00931137           | 1.71439                  |
| ANKRD48     | 0.0130358            | -1.42981                 | 0.1033581             | 1.24829                   | 0.0130358             | 1.24829                   | 0.0130358           | 1.24829                 | 0.0130358           | 1.24829                 | 0.0130358            | 1.24829                  |
| GIPC3       | 0.601321             | -1.05807                 | 0.0215355             | 1.75881                   | 0.0270911             | 2.51613                   | 0.0508373           | 1.86096                 | 0.00624043          | 2.66225                 | 0.179056             | 1.43058                  |
| DCBLD2      | 0.0164805            | -1.71595                 | 0.0652256             | 1.24426                   | 0.0226018             | 1.52325                   | 0.0118073           | 2.13508                 | 0.0064452           | 2.61227                 | 0.0027104            | 1.2235                   |
| OLFML2      | 0.023851             | -1.76899                 | 0.789233              | -1.03761                  | 0.0206346             | 1.47238                   | 0.0124655           | 1.70488                 | 0.0074539           | 2.60403                 | 0.0391888            | 1.52775                  |
| RAG1-DOA    | 0.0022467            | -1.85745                 | 0.139197              | 1.36197                   | 0.0144406             | 1.91972                   | 0.00389121          | 1.92514                 | 0.00389121          | 1.92514                 | 0.00389121           | 1.92514                  |
| HLA-DQA     | 0.0204796            | -1.69044                 | 0.100695              | 1.15947                   | 0.002569              | 1.51637                   | 0.0163763           | 1.96419                 | 0.00419019          | 2.5688                  | 0.0208659            | 1.30782                  |
| ZNF238      | 0.203962             | -1.14016                 | 0.0821234             | 1.14537                   | 0.001317              | 2.21422                   | 0.0217633           | 1.30591                 | 0.00740518          | 2.5457                  | 0.0098159            | 1.93319                  |
| CEP85       | 0.25325              | -1.10398                 | 0.816954              | 1.02029                   | 0.00213062            | 2.26061                   | 0.431534            | 1.12707                 | 0.00878429          | 2.49566                 | 0.00222545           | 2.12429                  |
| NCRNA00185  | 0.00147766           | -1.85745                 | 0.139197              | 1.36197                   | 0.0144406             | 1.91972                   | 0.00389121          | 1.92514                 | 0.00389121          | 1.92514                 | 0.00389121           | 1.92514                  |
| PTIPN2      | 0.0144766            | -1.3772                  | 0.0565731             | 1.52133                   | 0.00746167            | 1.76753                   | 0.0236995           | 2.09518                 | 0.0097077           | 2.42424                 | 0.0286166            | 1.16183                  |
| PRKAR1B     | 0.0393905            | -1.34666                 | 0.106756              | 1.53396                   | 0.043761              | 1.80251                   | 0.0238064           | 2.06752                 | 0.00333212          | 2.42737                 | 0.165213             | 1.17507                  |
| C20orf67    | 0.0062527            | -1.07733                 | 0.625733              | 1.08461                   | 0.0233221             | 1.10665                   | 0.0103956           | 2.36154                 | 0.0081867           | 2.40953                 | 0.009819             | 1.02332                  |
| RPL125      | 0.0172945            | -1.02923                 | 0.172945              | 1.02923                   | 0.0172945             | 1.02923                   | 0.0172945           | 1.02923                 | 0.0172945           | 1.02923                 | 0.0172945            | 1.02923                  |
| SGTB        | 0.120704             | -1.20704                 | 0.207798              | 1.1307                    | 0.00171385            | 1.97479                   | 0.0301383           | 1.36848                 | 0.000819015         | 2.38365                 |                      |                          |

|          |             |          |             |           |            |          |             |          |             |           |            |          |
|----------|-------------|----------|-------------|-----------|------------|----------|-------------|----------|-------------|-----------|------------|----------|
| ACOT9    | 0.002024    | 1.95583  | 0.326282    | -1.10728  | 0.0100305  | -1.57221 | 0.00444024  | -2.16565 | 0.00101711  | -3.07499  | 0.0458664  | -1.41989 |
| METRNL   | 0.0315461   | 2.93453  | 0.576408    | -1.10963  | 0.750361   | -1.06907 | 0.0106401   | -3.25623 | 0.00119388  | -3.17421  | 0.702667   | 1.03794  |
| BMP1R1A  | 0.0019376   | 1.7922   | 0.355192    | -1.3362   | 0.0025175  | -1.78118 | 0.00014383  | -2.79676 | 0.00021412  | -3.74442  | 0.037475   | -1.33401 |
| LRIG1    | 0.00893925  | 2.58571  | 0.085408    | -1.36406  | 0.0297177  | -1.23479 | 0.00323754  | -3.52707 | 0.00466887  | -3.1928   | 0.25104    | 1.1047   |
| APOBEC3G | 0.748311    | -1.05892 | 0.0256601   | -1.78605  | 0.00948943 | -3.38529 | 0.0441537   | -1.89612 | 0.00682943  | -3.19848  | 0.0500511  | -1.88485 |
| CACNB3   | 0.0702267   | 1.39541  | 0.0105111   | -1.68772  | 0.00130522 | -2.30777 | 0.0142975   | -2.35507 | 0.00316527  | -3.2203   | 0.028163   | -1.36739 |
| RNF19A   | 0.00487637  | 1.79001  | 0.0864489   | -1.46405  | 0.00646492 | -1.80421 | 0.00759114  | -2.62067 | 0.00155449  | -3.22956  | 0.132191   | -1.23234 |
| RAB27A   | 0.0120287   | 1.78758  | 0.0435844   | -1.28704  | 0.0453868  | -1.81193 | 0.00639162  | -2.30069 | 0.00578785  | -3.28924  | 0.0605235  | -1.40782 |
| FADS3    | 0.0712811   | 1.77896  | 0.0451474   | -1.67029  | 0.0310213  | -1.82114 | 0.0358407   | -2.97137 | 0.00214633  | -3.23973  | 0.660151   | -1.09031 |
| ACTN4    | 0.0241505   | 1.51055  | 0.0431144   | -1.43993  | 0.0280679  | -2.25365 | 0.00928651  | -2.17523 | 0.00702453  | -3.40448  | 0.042688   | -1.56511 |
| TBKP1    | 0.00239856  | 1.80721  | 0.501156    | -1.09357  | 0.0241556  | -1.9014  | 0.0160235   | -1.97631 | 0.00195502  | -3.48223  | 0.0995403  | -1.73871 |
| FAM53B   | 0.0977467   | 1.26095  | 0.00335127  | -1.71551  | 0.0167665  | -2.75586 | 0.00374111  | -2.16316 | 0.00468793  | -3.74499  | 0.051909   | -1.60644 |
| MAN1A    | 0.0176308   | 1.34504  | 0.117549    | -1.16881  | 0.00675998 | -2.59619 | 0.00188922  | -1.5721  | 0.00121467  | -3.47852  | 0.00220774 | -2.21266 |
| FAM38A   | 0.0236923   | 2.03902  | 0.0119389   | -1.57233  | 0.0115776  | -1.71683 | 0.00567471  | -3.20444 | 0.00197659  | -3.49892  | 0.260166   | -1.0919  |
| GRFL1    | 0.0819647   | 1.19111  | 0.00823955  | -1.56666  | 0.0164551  | -2.69819 | 0.0130592   | -2.0534  | 0.00124872  | -3.5522   | 0.045307   | -1.73332 |
| B4GALT5  | 0.264966    | 1.23818  | 0.183681    | -1.1777   | 0.0174164  | -2.9681  | 0.0228849   | -1.45821 | 0.0011094   | -3.67257  | 0.00662494 | -2.51855 |
| WIP1     | 0.0265406   | 1.54537  | 0.0694513   | -1.31069  | 0.0125226  | -2.37265 | 0.01252     | -2.02944 | 0.00330716  | -3.67373  | 0.057474   | -1.81022 |
| DUSP2    | 0.00432637  | 1.76475  | 0.105221    | -1.79914  | 0.0241188  | -2.13124 | 0.0263586   | -3.17504 | 0.00572672  | -3.76111  | 0.203041   | -1.18458 |
| UNKNOWN  | 0.282598    | 1.29783  | 0.0132068   | -1.03054  | 0.0132068  | -2.89842 | 0.18418     | -1.33746 | 0.0039006   | -3.76125  | 0.0140347  | -2.81253 |
| ANKA5    | 0.0487483   | 1.47546  | 0.154798    | -1.62814  | 0.017857   | -2.55025 | 0.0522389   | -2.40225 | 0.00942268  | -3.76278  | 0.0388949  | -1.56636 |
| AHNAK    | 0.00403359  | 2.09702  | 0.0493339   | -1.36318  | 0.0374452  | -1.79678 | 0.000191818 | -2.85862 | 0.00751324  | -3.76788  | 0.121815   | -1.31808 |
| CLIC1    | 0.00333307  | 1.87803  | 0.195357    | -1.42148  | 0.0225686  | -2.04491 | 0.0221552   | -2.66959 | 0.00300364  | -3.80441  | 0.0665079  | -1.43588 |
| MAP3K5   | 0.0223524   | 2.21064  | 0.209135    | -1.15874  | 0.00591493 | -1.77036 | 0.00180736  | -2.56157 | 0.00911751  | -3.91363  | 0.0457219  | -1.52783 |
| STES1A   | 0.00777112  | 3.9827   | 0.122733    | -1.34792  | 0.7017     | -1.04361 | 0.0031738   | -5.36836 | 0.000483408 | -4.1564   | 0.127185   | 1.29159  |
| TARP     | 0.151806    | 1.17291  | 0.0590849   | -1.07804  | 0.0152693  | -3.64367 | 0.324498    | -1.26444 | 0.00190662  | -4.27368  | 0.0174563  | -3.37391 |
| ADAM8    | 0.000465304 | 1.7226   | 0.00365572  | -1.55274  | 0.00311766 | -2.48769 | 0.00151303  | -2.67476 | 0.00173831  | -4.2853   | 0.00411283 | -1.60213 |
| CLIC1    | 0.00206263  | 2.07474  | 0.125021    | -2.0698   | 0.0100777  | -2.0698  | 0.0123889   | -2.99093 | 0.00301585  | -4.28431  | 0.0694171  | -1.43578 |
| MAIK     | 0.0241342   | 1.77404  | 0.409541    | -1.19423  | 0.00163301 | -2.46051 | 0.0365457   | -2.1186  | 0.00205422  | -4.36304  | 0.0344578  | -2.06034 |
| SLFN12L  | 0.0346539   | 1.60953  | 0.0863894   | -1.46707  | 0.00235666 | -2.76966 | 0.013792    | -2.35297 | 0.00689414  | -4.43911  | 0.065267   | -1.891   |
| PIK3R3   | 0.253422    | 1.22671  | 0.00628986  | -1.38821  | 0.0363201  | -3.67104 | 0.0738368   | -1.70293 | 0.00809574  | -4.50331  | 0.0718519  | -2.64444 |
| FAM46C   | 0.000151847 | 2.38455  | 0.199178    | -1.30603  | 0.0221943  | -1.99378 | 0.0140223   | -3.1143  | 0.00470007  | -4.74229  | 0.0481726  | -1.5266  |
| C1       | 0.00165965  | 1.9252   | 0.160715    | -1.34358  | 0.00943528 | -2.34358 | 0.0174676   | -2.82533 | 0.00162867  | -4.82523  | 0.016448   | -1.51648 |
| ANKA2    | 0.00944822  | 2.14981  | 0.0447382   | -1.69677  | 0.00869701 | -2.31306 | 0.0198343   | -3.17423 | 0.00840153  | -4.97263  | 0.0141684  | -1.36522 |
| CTNNA1   | 0.0389416   | 1.60943  | 0.111984    | -1.44082  | 0.0199904  | -3.19215 | 0.0200334   | -2.3189  | 0.00382756  | -5.13752  | 0.0027605  | -2.3815  |
| NPC1     | 0.0327133   | 1.63156  | 0.03474     | -1.3467   | 0.00365103 | -3.14888 | 0.00828624  | -2.19723 | 0.00617869  | -5.1376   | 0.020795   | -2.23221 |
| ADRX2    | 0.00120844  | 1.46537  | 0.114046    | -1.34693  | 0.00623767 | -4.67704 | 0.0531329   | -2.5997  | 0.0033705   | -5.13798  | 0.011066   | -2.52836 |
| ERNA     | 0.0125268   | 1.91519  | 0.0200908   | -2.03407  | 0.0073597  | -3.0052  | 0.00386083  | -3.89736 | 0.00518703  | -5.5552   | 0.178128   | -1.47678 |
| YPEL1    | 0.0695082   | 1.89975  | 0.0215944   | -1.69428  | 0.0348141  | -3.15733 | 0.0286234   | -3.2187  | 0.00851851  | -5.98913  | 0.16276    | -1.86352 |
| TBXT2    | 0.00152381  | 2.97171  | 0.240503    | -1.10384  | 0.035002   | -2.05205 | 0.00727051  | -3.27971 | 0.00657339  | -6.09809  | 0.0585335  | -1.85934 |
| CDM      | 0.0029587   | 1.60953  | 0.0424174   | -1.20337  | 0.0344485  | -1.94075 | 0.00065977  | -3.78073 | 0.00695307  | -6.09809  | 0.0387652  | -1.61694 |
| PHACTR2  | 0.0197976   | 2.1235   | 0.000158255 | -2.3582   | 0.0214872  | -2.99937 | 0.00426335  | -2.89937 | 0.00266193  | -6.34793  | 0.02189    | -2.6765  |
| GBP5     | 0.0171298   | 2.40454  | 0.560373    | 1.06214   | 0.0169404  | -2.71925 | 0.0392015   | -2.26386 | 0.000116626 | -6.53855  | 0.0258359  | -2.89823 |
| ADRX1    | 0.00747854  | 1.46537  | 0.114046    | -1.34693  | 0.00623767 | -4.67704 | 0.0531329   | -2.5997  | 0.0033705   | -6.53928  | 0.011066   | -2.52836 |
| UNKNOWN  | 0.00117643  | 2.91816  | 0.652053    | -1.09569  | 0.095773   | -2.2674  | 0.0319668   | -3.19739 | 0.00805024  | -6.16665  | 0.146589   | -2.06939 |
| PIK3AP1  | 0.005689    | 1.50323  | 0.217086    | -1.42813  | 0.00931001 | -4.40381 | 0.0597582   | -2.14681 | 0.0036406   | -6.61996  | 0.045906   | -3.03862 |
| UNKNOWN  | 0.0229876   | 1.56156  | 0.198417    | -1.58827  | 0.00580939 | -4.26118 | 0.0943058   | -2.48018 | 0.00255969  | -6.64029  | 0.106231   | -2.8629  |
| DUSP10   | 0.0220658   | 3.10753  | 0.465729    | -1.19387  | 0.00425221 | -2.18533 | 0.0289338   | -3.70399 | 0.00491971  | -6.7941   | 0.114225   | -1.3313  |
| PTGDR    | 0.00291546  | 1.58251  | 0.129484    | -1.62677  | 0.00952846 | -4.42195 | 0.0676344   | -2.57438 | 0.00427871  | -6.99778  | 0.0970549  | -2.71823 |
| EOMES    | 0.00150508  | 2.93308  | 0.241966    | -1.57202  | 0.0064771  | -2.48984 | 0.0324695   | -4.41087 | 0.000904876 | -7.21227  | 0.319225   | -1.56419 |
| MAF      | 0.0354317   | 1.60456  | 0.0264973   | -2.64936  | 0.0098329  | -4.4993  | 0.00614224  | -4.25105 | 0.00113806  | -7.21937  | 0.0197814  | -1.69826 |
| TSPG1    | 0.0385455   | 0.94057  | 0.0240551   | -1.93644  | 0.00314364 | -2.38539 | 0.0053254   | -5.93536 | 0.00709768  | -7.27294  | 0.0660552  | -1.23185 |
| NBEAL2   | 0.0112494   | 2.22995  | 0.0163264   | -2.38181  | 2.52E-06   | -3.34526 | 0.00274559  | -5.31132 | 0.00177255  | -7.49375  | 0.0948669  | -1.4045  |
| NCAPI    | 0.00784854  | 2.76233  | 0.0144006   | -3.90517  | 0.0420337  | -2.74215 | 0.00124699  | -10.7874 | 0.00519856  | -7.57472  | 0.172949   | 1.42413  |
| SLOC44   | 0.0318743   | 1.81279  | 0.238015    | -1.28015  | 0.0089362  | -4.22451 | 0.0245667   | -3.23605 | 0.00986106  | -7.65614  | 0.0522746  | -3.30001 |
| FOSL2    | 0.00301153  | 3.85086  | 0.0217722   | -1.41245  | 0.0299182  | -2.00316 | 0.00034848  | -5.58039 | 0.0019427   | -8.02086  | 0.0019427  | -1.43733 |
| RG52     | 0.022378    | 3.9777   | 0.366924    | -1.159616 | 0.159616   | -2.0389  | 0.00542704  | -4.88297 | 0.00386204  | -8.11014  | 0.100037   | -1.6609  |
| TGFB3    | 0.0180451   | 2.41474  | 0.00718025  | -2.10423  | 0.0198162  | -3.37037 | 0.00900298  | -5.08118 | 0.00555393  | -8.13858  | 0.0801087  | -1.60171 |
| MYO1F    | 0.00563135  | 2.98031  | 0.052077    | -1.62434  | 0.00853022 | -2.88121 | 0.00792721  | -4.80854 | 0.00160004  | -8.52927  | 0.019711   | -1.77378 |
| C17orf66 | 0.0376484   | 3.78024  | 0.186116    | -1.38676  | 0.11911    | -2.32949 | 0.0122284   | -5.24228 | 0.000938591 | -8.80602  | 0.17538    | -1.67981 |
| CYTH3    | 0.00253907  | 1.48984  | 0.0198375   | -2.97485  | 0.007553   | -6.02106 | 0.0136016   | -4.43219 | 0.00431021  | -8.97041  | 0.142238   | -2.02392 |
| WEI1     | 0.0016158   | 4.14954  | 0.0407973   | -2.13723  | 0.063864   | -2.35598 | 0.00363499  | -8.8688  | 0.00964717  | -9.77624  | 0.527878   | -1.10236 |
| PYHIN1   | 0.0171511   | 5.12975  | 0.109847    | -1.32085  | 0.158648   | -1.91206 | 0.00781467  | -6.77429 | 0.0119598   | -9.80649  | 0.25848    | -1.4476  |
| F2R      | 0.00489907  | 5.44255  | 0.353924    | -1.39095  | 0.0147183  | -2.17584 | 0.0395073   | -6.18487 | 0.00305018  | -9.83877  | 0.326577   | -1.56428 |
| UNKNOWN  | 0.147581    | 2.14897  | 0.0981469   | -2.98607  | 0.00273673 | -8.00644 | 0.0427356   | -3.72354 | 0.00709793  | -9.98378  | 0.173715   | -2.68126 |
| TARP     | 0.0192343   | 2.09912  | 0.0329152   | -1.40936  | 0.0132221  | -4.93237 | 0.00481382  | -2.95841 | 0.00119677  | -10.3345  | 0.0134388  | -3.93327 |
| TBS1     | 0.00128369  | 2.22071  | 0.539797    | -1.08979  | 0.00269698 | -5.30128 | 0.006272    | -2.37571 | 0.000629317 | -11.7726  | 1.84E-05   | -4.95642 |
| CD58     | 0.00471822  | 4.26874  | 0.004386    | -2.12697  | 0.00212238 | -2.85231 | 0.000512353 | -9.07948 | 0.0016947   | -12.15788 | 0.041692   | -1.34102 |
| UNKNOWN  | 0.0323405   | 2.37392  | 0.189769    | -1.39528  | 0.00247522 | -5.34257 | 0.00350993  | -3.31227 | 0.001112961 | -12.6828  | 0.0085749  | -3.82904 |
| AUTS2    | 0.0381008   | 1.65322  | 0.016258    | -2.49284  | 0.0098942  | -8.96817 | 0.00056275  | -4.22058 | 0.0015602   | -15.1851  | 0.00715705 | -3.59786 |
| FAM128A  | 0.00416919  | 5.87953  | 0.00515485  | -3.46155  | 0.0196464  | -2.71332 | 0.00447987  | -20.3537 | 0.00709509  | -15.9542  | 0.205219   | 1.27576  |
| TNIP3    | 0.0221607   | 3.32963  | 0.00242619  | -1.7967   | 0.0487888  | -3.08583 | 0.0110076   | -9.57576 | 0.00687684  | -16.4463  | 0.14262    | -1.7175  |
| GZMA     | 0.0285766   | 3.13224  | 0.0424644   | -1.85988  | 0.0489932  | -5.5604  | 0.0299847   | -8.82559 | 0.00545218  | -17.4165  | 0.170594   | -2.89966 |
| PRXSL    | 0.0731053   | 2.12985  | 0.0642123   | -3.43862  | 0.0242373  | -8.88834 | 0.0020686   | -9.25179 | 0.0094646   | -18.5059  | 0.126653   | -2.00025 |
| PRDM1    |             |          |             |           |            |          |             |          |             |           |            |          |

## Supplementary Table 9 Differentially regulated genes among TCM and TEM

| Gene Symbol | p-value(TSCM vs. TN) | Fold-Change(TSCM vs. TN) | p-value(TSCM vs. TCM) | Fold-Change(TSCM vs. TCM) | p-value(TSCM vs. TEM) | Fold-Change(TSCM vs. TEM) | p-value(TN vs. TCM) | Fold-Change(TN vs. TCM) | p-value(TN vs. TEM) | Fold-Change(TN vs. TEM) | p-value(TCM vs. TEM) | Fold-Change(TCM vs. TEM) |
|-------------|----------------------|--------------------------|-----------------------|---------------------------|-----------------------|---------------------------|---------------------|-------------------------|---------------------|-------------------------|----------------------|--------------------------|
| SELL        | 0.487505             | 1.06449                  | 0.232693              | 1.13116                   | 0.00459254            | 30.0668                   | 0.272967            | 1.06263                 | 0.00859592          | 28.2452                 | 0.0026915            | 26.5806                  |
| CDH1        | 0.079209             | 2.75838                  | 0.0169505             | -4.34523                  | 0.134166              | 2.44033                   | 0.00214294          | -1.19858                | 0.371855            | -1.13033                | 0.00539789           | 10.6038                  |
| TSHZ2       | 0.168897             | 1.41554                  | 0.877598              | -1.06727                  | 0.0127453             | 9.00671                   | 0.188064            | -1.51076                | 0.00243344          | 6.36273                 | 0.0038939            | 9.61255                  |
| SESN3       | 0.0427483            | 2.57498                  | 0.0819508             | -1.17751                  | 0.00157746            | 6.14378                   | 0.028145            | -3.03206                | 0.075412            | 2.38995                 | 0.00102589           | 7.23433                  |
| IL6T        | 0.00356465           | -2.02168                 | 0.53256               | 1.11083                   | 0.013613              | 2.85814                   | 0.0316966           | 2.24675                 | 0.00231292          | 5.77825                 | 0.00792746           | 2.57297                  |
| KIAA0748    | 0.0304212            | -1.1488                  | 0.733517              | 1.0488                    | 0.0176314             | 2.67605                   | 0.203334            | 1.20486                 | 0.00918107          | 3.07426                 | 0.00748204           | 2.55155                  |
| OCM2        | 0.636401             | -1.03388                 | 0.332784              | 1.15258                   | 0.00140659            | 2.93399                   | 0.194078            | 1.19162                 | 0.000606448         | 3.03338                 | 0.00741561           | 2.54558                  |
| HMGGB3      | 0.0155736            | 1.68247                  | 0.00862397            | -2.02835                  | 0.0018988             | 1.24741                   | 0.00743596          | -3.41264                | 0.0574914           | -1.34878                | 0.00137723           | 2.53017                  |
| WNT7A       | 0.241275             | 1.11277                  | 0.986515              | 1.00163                   | 0.00381162            | 2.48233                   | 0.13267             | -1.11055                | 0.0113532           | 2.23077                 | 0.0107343            | 2.47828                  |
| CEP68       | 0.25325              | -1.10398                 | 0.805954              | 1.02092                   | 0.00213062            | 2.26061                   | 0.431534            | 1.12707                 | 0.00878429          | 2.49566                 | 0.0022545            | 2.21429                  |
| SULT1B1     | 0.0133697            | -5.00719                 | 0.189641              | 1.83317                   | 0.0590558             | 4.04532                   | 0.00307328          | 9.17902                 | 0.00340866          | 20.2557                 | 0.006361             | 2.20673                  |
| C16orf45    | 0.0565525            | 1.55575                  | 0.996177              | 1.00061                   | 0.0247002             | 2.09759                   | 0.0675954           | -1.55479                | 0.0526339           | 1.34628                 | 0.00630052           | 2.0963                   |
| SFXN1       | 0.0327926            | 1.17265                  | 0.151773              | -1.15786                  | 0.0185127             | 1.78087                   | 0.0237491           | -1.35776                | 0.0253302           | 1.57867                 | 0.00087825           | 2.062                    |
| RGMB        | 0.0786522            | -1.42335                 | 0.10852               | -1.05236                  | 0.00667371            | 1.94006                   | 0.0813559           | 1.35253                 | 0.00822602          | 2.76137                 | 0.00712346           | 2.04164                  |
| SH2D2A      | 0.0120844            | 2.02574                  | 0.0210689             | -1.3314                   | 0.00490969            | -2.77655                  | 0.00190058          | -2.89706                | 0.0041498           | -5.62456                | 0.00923322           | -2.08544                 |
| GALNT10     | 0.0988905            | 1.1232                   | 0.0988945             | 1.27651                   | 0.0417848             | -1.65646                  | 0.391697            | 1.1365                  | 0.050958            | -1.87064                | 0.0161641            | -2.12597                 |
| OSBPL5      | 0.00425357           | -2.09942                 | 0.543527              | 1.05539                   | 0.028139              | -2.05199                  | 0.0147978           | 2.21571                 | 0.875666            | 1.02311                 | 0.0545625            | -2.16566                 |
| MAN1A1      | 0.0176308            | 1.34504                  | 0.117549              | -1.16881                  | 0.00675898            | -2.58619                  | 0.00188692          | -1.5721                 | 0.00121487          | -3.47852                | 0.00220774           | -2.21266                 |
| CTNNA1      | 0.0389416            | 1.60943                  | 0.111984              | -1.44082                  | 0.0199904             | -3.19215                  | 0.0200334           | -2.3189                 | 0.00382756          | -5.13752                | 0.00927605           | -2.2155                  |
| B4GALT5     | 0.264966             | 1.23816                  | 0.183661              | -1.1777                   | 0.0174164             | -2.3661                   | 0.0228849           | -1.45821                | 0.0011084           | -3.67257                | 0.00662494           | -2.18555                 |
| FASLG       | 0.429314             | 1.05158                  | 0.045263              | -2.30097                  | 0.0168423             | -5.82944                  | 0.0530057           | -2.41965                | 0.0203691           | -6.25228                | 0.0032631            | -2.57694                 |
| AUTS2       | 0.0381008            | 1.69322                  | 0.018258              | -2.49264                  | 0.00988942            | -8.96817                  | 0.000658275         | -4.22058                | 0.00175802          | -15.1851                | 0.00715705           | -3.59786                 |
| MYBL1       | 0.0069762            | 3.93023                  | 0.0403337             | -1.57598                  | 0.0143397             | -5.95765                  | 0.000569471         | -6.19395                | 0.00138638          | -23.4149                | 0.00287117           | -3.78029                 |
| UNKNOWN     | 0.0323405            | 2.37392                  | 0.189769              | -1.38528                  | 0.00247522            | -5.34257                  | 0.00350993          | -3.31227                | 0.00112961          | -12.8828                | 0.00855749           | -3.82904                 |
| GALNT3      | 0.0749899            | 1.25115                  | 0.56637               | -1.11177                  | 0.0328758             | -5.20491                  | 0.259545            | -1.391                  | 0.035054            | -6.51215                | 0.0094753            | -4.68164                 |
| THBS1       | 0.00128369           | 2.22071                  | 0.539797              | -1.08979                  | 0.00260658            | -5.30128                  | 0.0062272           | -2.37571                | 0.000626317         | -11.7726                | 1.84E-05             | -4.95542                 |
| GNLY        | 0.133864             | 1.92029                  | 0.0312633             | -2.30714                  | 0.00939853            | -15.0732                  | 0.0672597           | -4.43037                | 0.0119439           | -28.3449                | 0.0080462            | -6.53329                 |
| ST8SIA6     | 0.470914             | 1.12935                  | 0.0933289             | -2.44753                  | 0.0141034             | -16.9712                  | 0.114817            | -2.76411                | 0.022599            | -19.1663                | 0.00395659           | -6.93401                 |

## Supplementary Methods

**Enumeration of adoptively transferred T cells into NSG mice.** CD8-enriched PBMC were sorted into  $T_N$ ,  $T_{SCM}$ ,  $T_{CM}$  and  $T_{EM}$ . CD8<sup>-</sup> PBMC resulting from the negative selection of CD8<sup>+</sup> T cells were stained with FITC anti-CD8 Ab and sorted on a FACS Aria to avoid any possible contamination by remaining CD8<sup>+</sup> T cells. We adoptively transferred via i.v. injection at least  $5 \times 10^6$  CD8<sup>-</sup> PBMC with or without  $10^6$  sorted subset-specific T cells per mouse. Three replicate mice received the same T cell subset to avoid variability due to the inefficiency of the engraftment. Mice were sacrificed five weeks after adoptive transfer. Spleen, liver, lungs and LN were minced and meshed on the top of a 100  $\mu$ m cell strainer (BD Biosciences); total bone marrow was obtained by flushing the femurs with Hank's balanced salt solution. Mononuclear cells were then isolated by Ficoll gradient centrifugation. Cell suspensions were stained with ViViD as described above and with a cocktail of fluorescently-conjugated mAbs directed to surface antigens, including Cy7PE rat anti-mouse CD45 (mCD45) and Cy5PE mouse anti-human CD45 (hCD45) to detect both mouse and human cells, respectively. To determine the total live cell count, aliquots of cells were resuspended in a solution containing ethidium bromide and acridine orange (Invitrogen), and counted using a Cellometer (Nexcelom Biosciences). Total cell counts per single organ were calculated as the number of live mCD45<sup>+</sup> and hCD45<sup>+</sup>

cells in the lymphocyte gate. Complete Blood Counts (NIH Clinical Laboratory) revealed the number of circulating cells in the blood.

### **Determination of telomerase activity**

Telomerase activity was evaluated using TRAPeze Telomerase Detection Kit (EMD Millipore). Quantification of the amount of telomerase product was determined using the following formula:

$$\text{TPG (units)} = [(x - x_0) / c] / [(r - r_0) / c_R] \times 100$$

$x$  = TRAP product ladder bands from all non-heat-treated samples;  $x_0$  = TRAP product ladder bands from all heat-treated samples;  $r$  = TSR8 quantitation control;  $r_0$  = primer-dimer/PCR contamination control;  $c$  = internal standard (S-IC) in non-heat-treated samples;  $c_R$  = internal standard (S-IC) in TSR8 quantitation control. Each unit of TPG corresponds to the number of TS primers (in  $1 \times 10^{-3}$  a mole or 600 molecules) extended with at least 4 telomeric repeats by telomerase in the extract in a 30 minute incubation at 30 °C.

### **Full gene names of selected transcripts**

*LEF1*, lymphoid enhancer-binding factor 1; *ACTN1*, actinin, alpha 1; *FOXPI*, forkhead box P1; *IL6ST*, interleukin 6 signal transducer (gp130, oncostatin M receptor); *LASS6*, LAG1 homolog, ceramide synthase 6; *TAF4B*, TAF4b RNA

polymerase II, TATA box binding protein (TBP)-associated factor, 105kDa; *EOMES*, eomesodermin; *GZMA*, granzyme A (granzyme 1, cytotoxic T-lymphocyte-associated serine esterase 3); *TBX21*, T-box 21; *PRF1*, perforin 1 (pore forming protein); *PRDM1*, PR domain containing 1, with ZNF domain; *KLRG1*, killer cell lectin-like receptor subfamily G, member 1; *ALOX5AP*, arachidonate 5-lipoxygenase-activating protein; *TGFBR3*, transforming growth factor, beta receptor III; *PHACTR2*, phosphatase and actin regulator 2; *FAM129A*, family with sequence similarity 129, member A; *CD58*, CD58 molecule; *TOX*, thymocyte selection-associated high mobility group box; *HNRPLL*, heterogeneous nuclear ribonucleoprotein L-like; *SLFN11*, schlafen family member 11; *DUSP4*, dual specificity phosphatase 4; *PRR5L*, proline rich 5 like; *GLUL*, glutamate-ammonia ligase; *IL9R*, interleukin 9 receptor; *HMGB3*, high mobility group box 3; *CCR4*, chemokine (C-C motif) receptor 4; *MYB*, v-myb myeloblastosis viral oncogene homolog (avian); *TIMD4*, T-cell immunoglobulin and mucin domain containing 4; *PPFIBP2*, PTPRF interacting protein, binding protein 2 (liprin beta 2); *FCER1G*, Fc fragment of IgE, high affinity I, receptor for; gamma polypeptide; *IGF1R*, insulin-like growth factor 1 receptor.

### Supplementary references

1. Romero, P. *et al.* Four functionally distinct populations of human effector-memory CD8<sup>+</sup> T lymphocytes. *J. Immunol.* **178**, 4112-4119 (2007).
